# Supplementary material for: Description of a Sarcoptic Mange Outbreak in Alpine Chamois Using an Enhanced Surveillance Approach
Source: MDPI journal article supplement (doi:10.3390/ani12162077), 2022-08-15
Supplement: s1 [file s1]

| Table S1 - Mange management strategy in chamois populations of Trento Province |                                                               |                                                                     |                                                                                                                                                                                                                                                                                                                                                                                                                               |
|--------------------------------------------------------------------------------|---------------------------------------------------------------|---------------------------------------------------------------------|-------------------------------------------------------------------------------------------------------------------------------------------------------------------------------------------------------------------------------------------------------------------------------------------------------------------------------------------------------------------------------------------------------------------------------|
| Type                                                                           | Description                                                   | Prioritary management aims                                          | Management                                                                                                                                                                                                                                                                                                                                                                                                                    |
| 1                                                                              | First mange cases in naïve zone                               | Monitoring                                                          | Eventual increase of hunting bag (up to 20% of previous census)                                                                                                                                                                                                                                                                                                                                                               |
| 2                                                                              | Mange cases with no (<15%) population decline                 | No hunting restrictions                                             | As with no demographic decline                                                                                                                                                                                                                                                                                                                                                                                                |
| 3                                                                              | Mange cases with moderate (15-30%) population decline         | No hunting restrictions                                             | Hunting bag < 10% of previous census                                                                                                                                                                                                                                                                                                                                                                                          |
| 4                                                                              | Mange cases with evident (30-40%) population decline          | Spare resistant animals; limit disturbance on infected animals      | Hunting bag < 5% of previous census                                                                                                                                                                                                                                                                                                                                                                                           |
| 5                                                                              | Mange cases with evident (>40%) population decline            | Spare resistant animals; limit disturbance on infected animals      | No hunting                                                                                                                                                                                                                                                                                                                                                                                                                    |
| 6                                                                              | Naïve zone bordering affected areas                           | Monitoring                                                          | Eventual increase of hunting bag (up to 20% of previous census)                                                                                                                                                                                                                                                                                                                                                               |
| 7                                                                              | Post epidemic situation (applicable for no more than 3 years) | Promote demographic recovery ( $\geq 50\%$ of pre-epidemic status). | <p>Hunting bag is defined according to the effective demography recovery. Hunting must return to normality following these steps:</p> <ul style="list-style-type: none"> <li>• 50-70% of pre-epidemic stocks: hunting bag <math>\leq 5\%</math> of census data</li> <li>• 70-80% of pre-epidemic stocks: hunting bag <math>\leq 10\%</math> of census data</li> <li>• <math>\geq 80\%</math>: ordinary hunting bag</li> </ul> |
