# Supplementary material for: Description of a Sarcoptic Mange Outbreak in Alpine Chamois Using an Enhanced Surveillance Approach
Source: MDPI journal article supplement (doi:10.3390/ani12162077), 2022-08-15
Supplement: s1 [file s1]

Table S2 - Summary of Mange strategy in mange zones 2006-2020

| Mange zone       | 2006      | 2007      | 2008      | 2009      | 2010      | 2011      | 2012      | 2013      | 2014      | 2015      | 2016      | 2017      | 2018      | 2019      | 2020      |
|------------------|-----------|-----------|-----------|-----------|-----------|-----------|-----------|-----------|-----------|-----------|-----------|-----------|-----------|-----------|-----------|
| PAN              | Type<br>3 | Type<br>3 | Type<br>3 | Type<br>3 | Type<br>3 | Type<br>4 | Type<br>4 | Type<br>5 | Type<br>5 | Type<br>7 | Type<br>7 | Type<br>7 | OM        | OM        | OM        |
| ROL              | Type<br>6 | Type<br>2 | Type<br>5 |
| LIT              | OM        | OM        | OM        | OM        | OM        | OM        | Type<br>2 | Type<br>3 | Type<br>3 | Type<br>4 | Type<br>4 | Type<br>3 | Type<br>3 | Type<br>3 | Type<br>3 |
| STE              | OM        | OM        | OM        | OM        | OM        | OM        | Type<br>2 | Type<br>3 | Type<br>3 | Type<br>3 | Type<br>3 | Type<br>4 | Type<br>4 | Type<br>4 | Type<br>4 |
| CAU              | Type<br>1 | Type<br>1 | Type<br>1 | Type<br>3 | Type<br>3 | Type<br>4 | Type<br>4 | Type<br>5 | Type<br>5 | Type<br>7 | Type<br>7 | Type<br>7 | OM        | OM        | OM        |
| LSO              | OM        | Type<br>2 | Type<br>2 | Type<br>3 | Type<br>3 | Type<br>7 | Type<br>7 | Type<br>7 | OM        |
| SCA              | Type<br>2 | Type<br>5 | Type<br>5 | Type<br>5 | Type<br>5 | Type<br>5 | Type<br>5 | Type<br>7 | Type<br>7 |
| TOT              | OM        | Type<br>1 | Type<br>2 | Type<br>2 | Type<br>3 | Type<br>4 | Type<br>5 | Type<br>6 |
| PAL              | Type<br>1 | Type<br>1 | Type<br>1 | Type<br>3 | Type<br>3 | Type<br>3 | Type<br>4 | Type<br>4 | Type<br>3 | Type<br>3 | Type<br>3 | Type<br>3 | Type<br>7 | Type<br>7 | Type<br>7 |
| OLT              | OM        | Type<br>4 | Type<br>4 | Type<br>2 | Type<br>2 | Type<br>7 | Type<br>7 | Type<br>7 |
| VFS <sup>1</sup> |           |           |           |           |           | OM        | OM        | OM        | OM        | OM        | Type<br>2 | Type<br>5 | Type<br>5 | Type<br>5 | Type<br>5 |
| VFM <sup>1</sup> |           |           |           |           |           | OM        | Type<br>4 | Type<br>5 | Type<br>5 |

OM - Ordinary management

<sup>1</sup>Vette Feltrine management unit was split into VFS and VMS in 2011
