# Supplementary figures and images for: Description of a Sarcoptic Mange Outbreak in Alpine Chamois Using an Enhanced Surveillance Approach
Source: MDPI journal article supplement (doi:10.3390/ani12162077), 2022-08-15

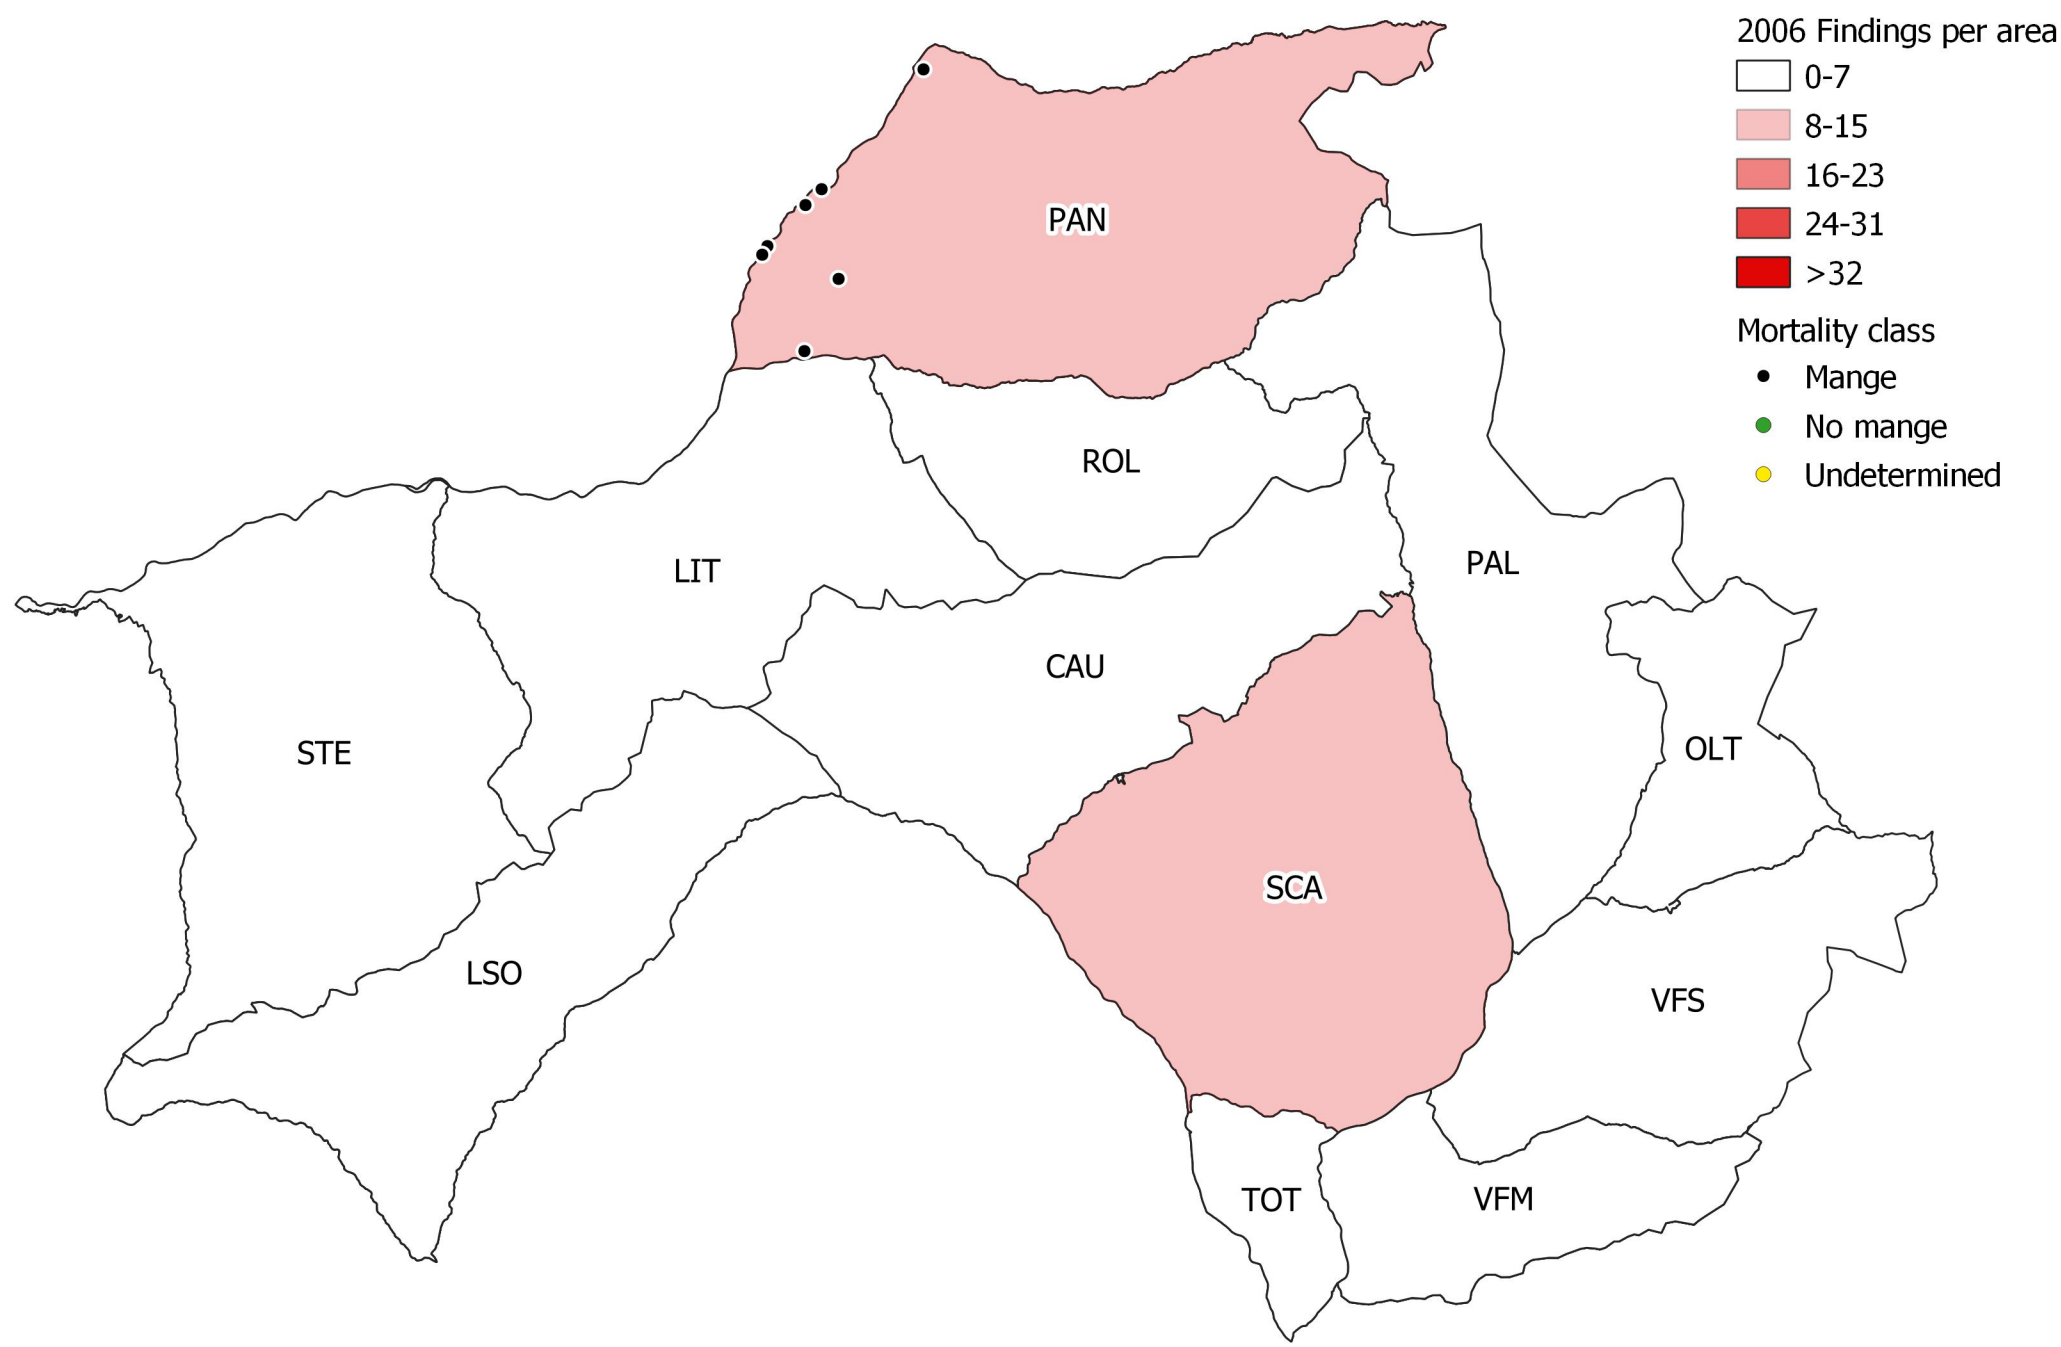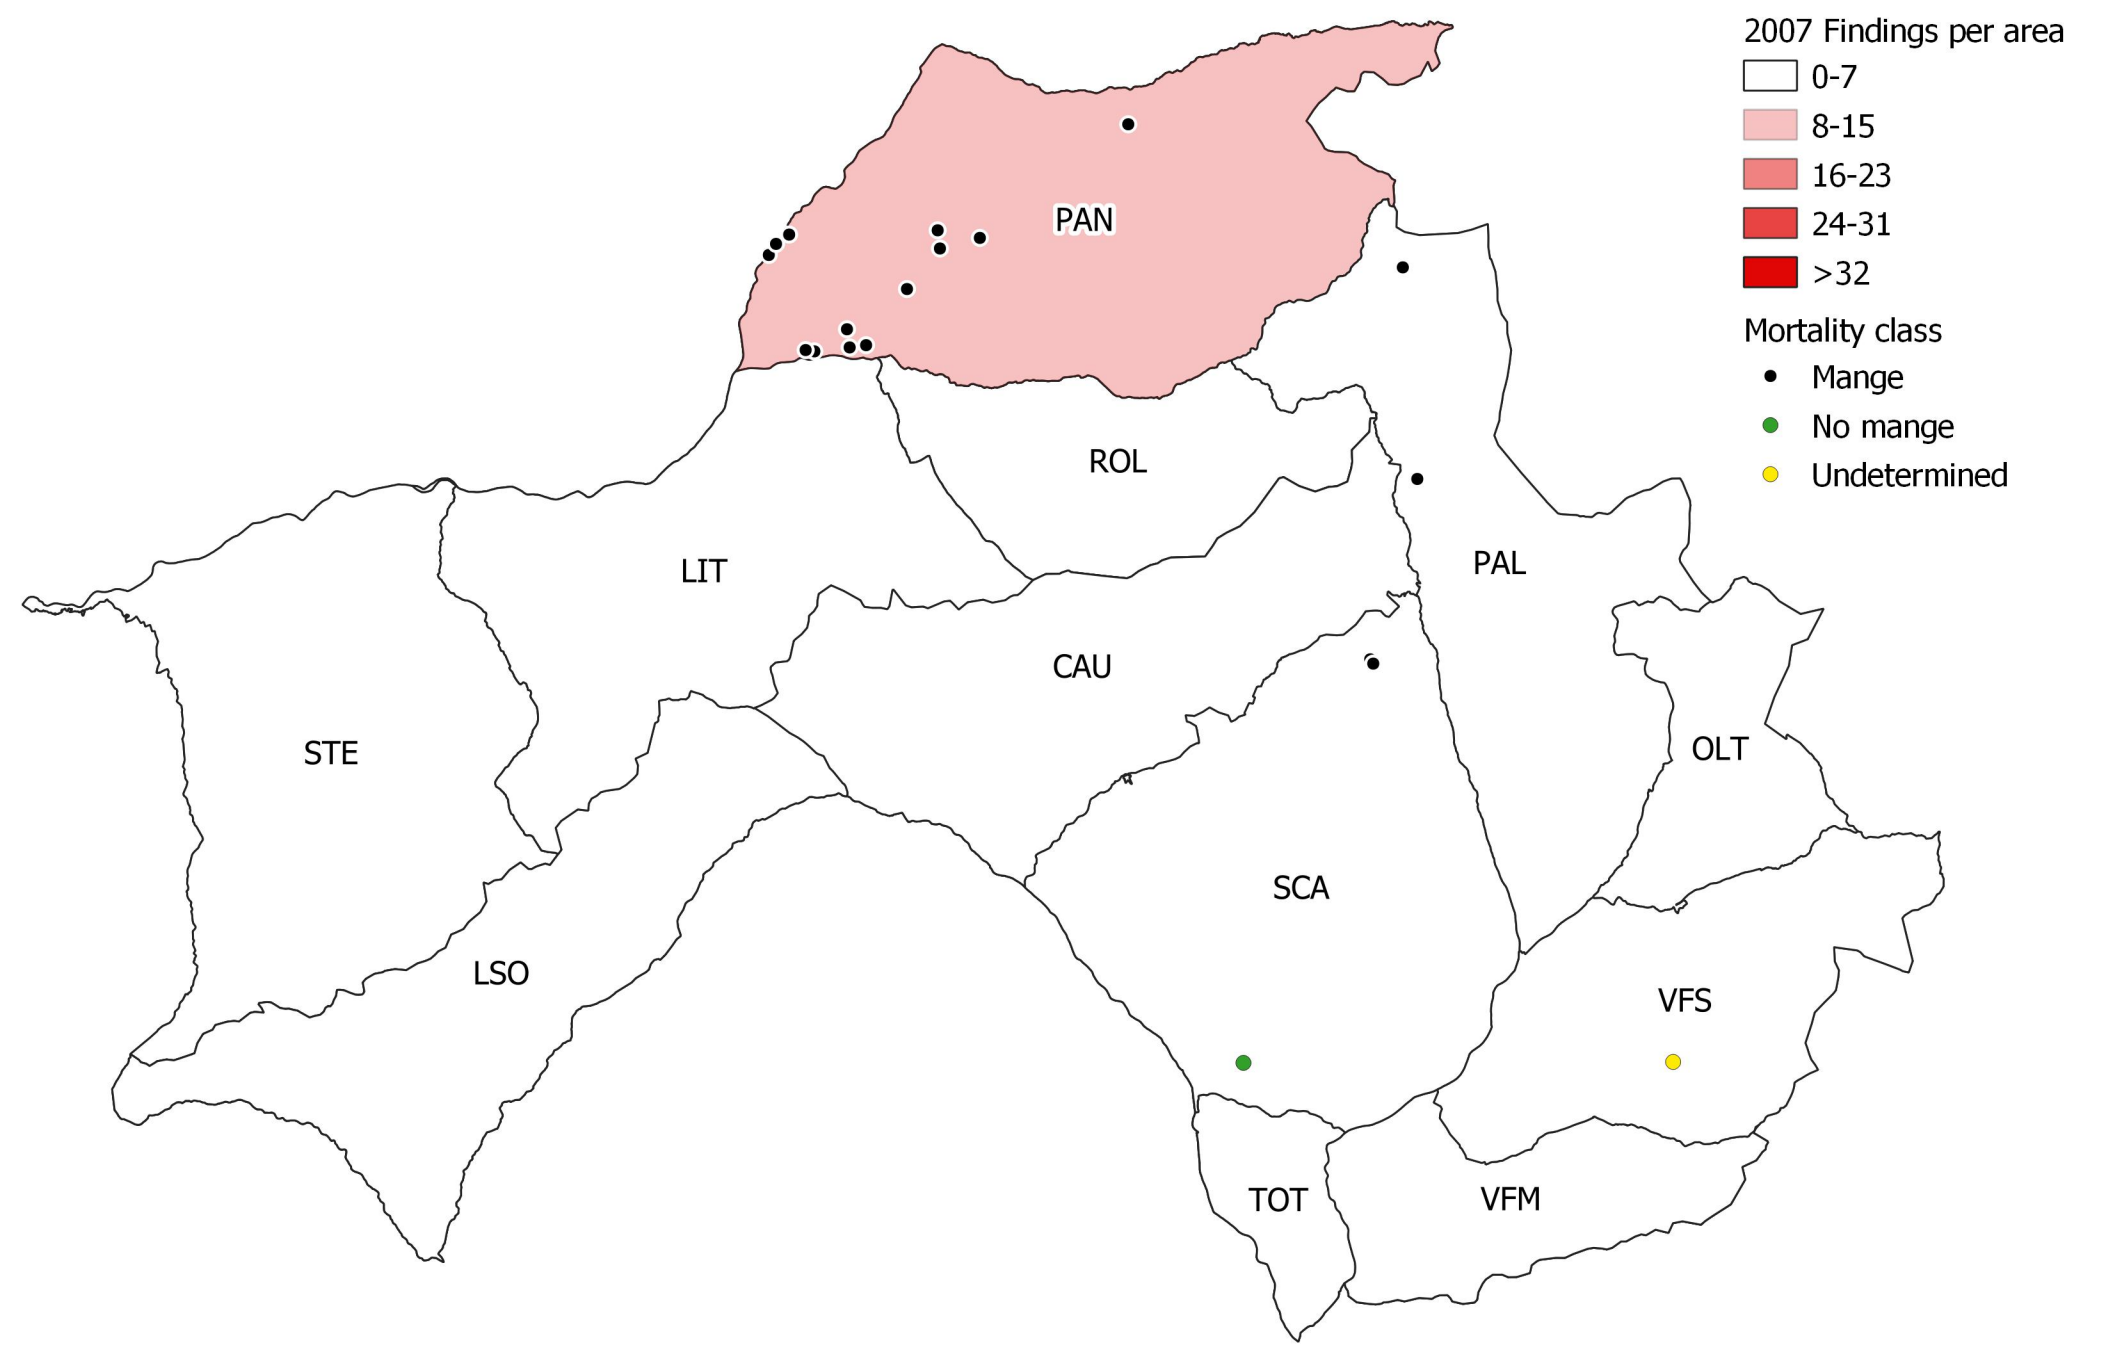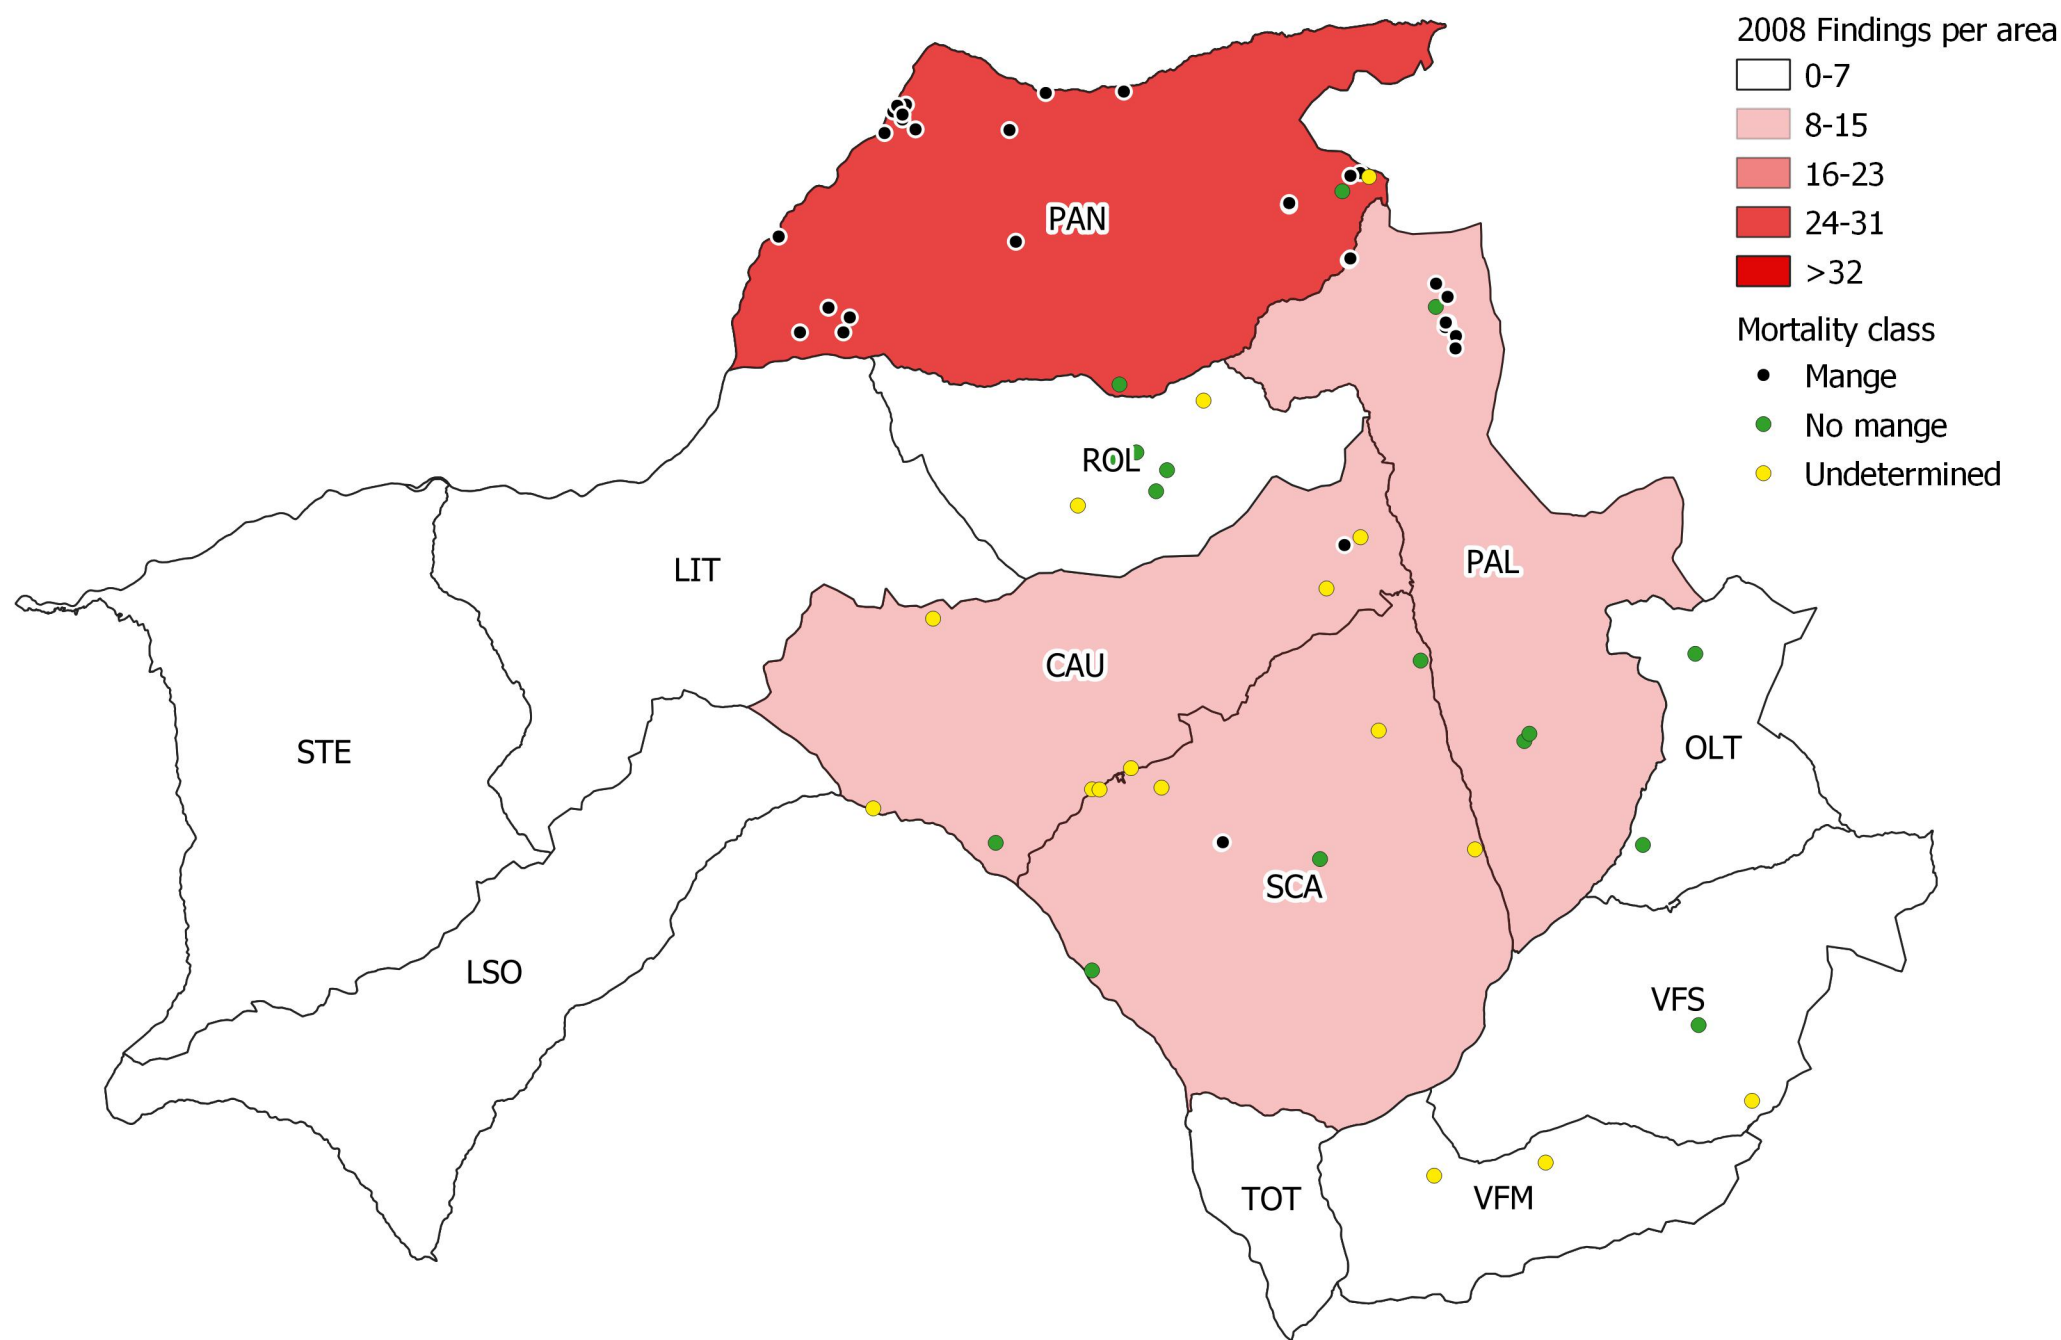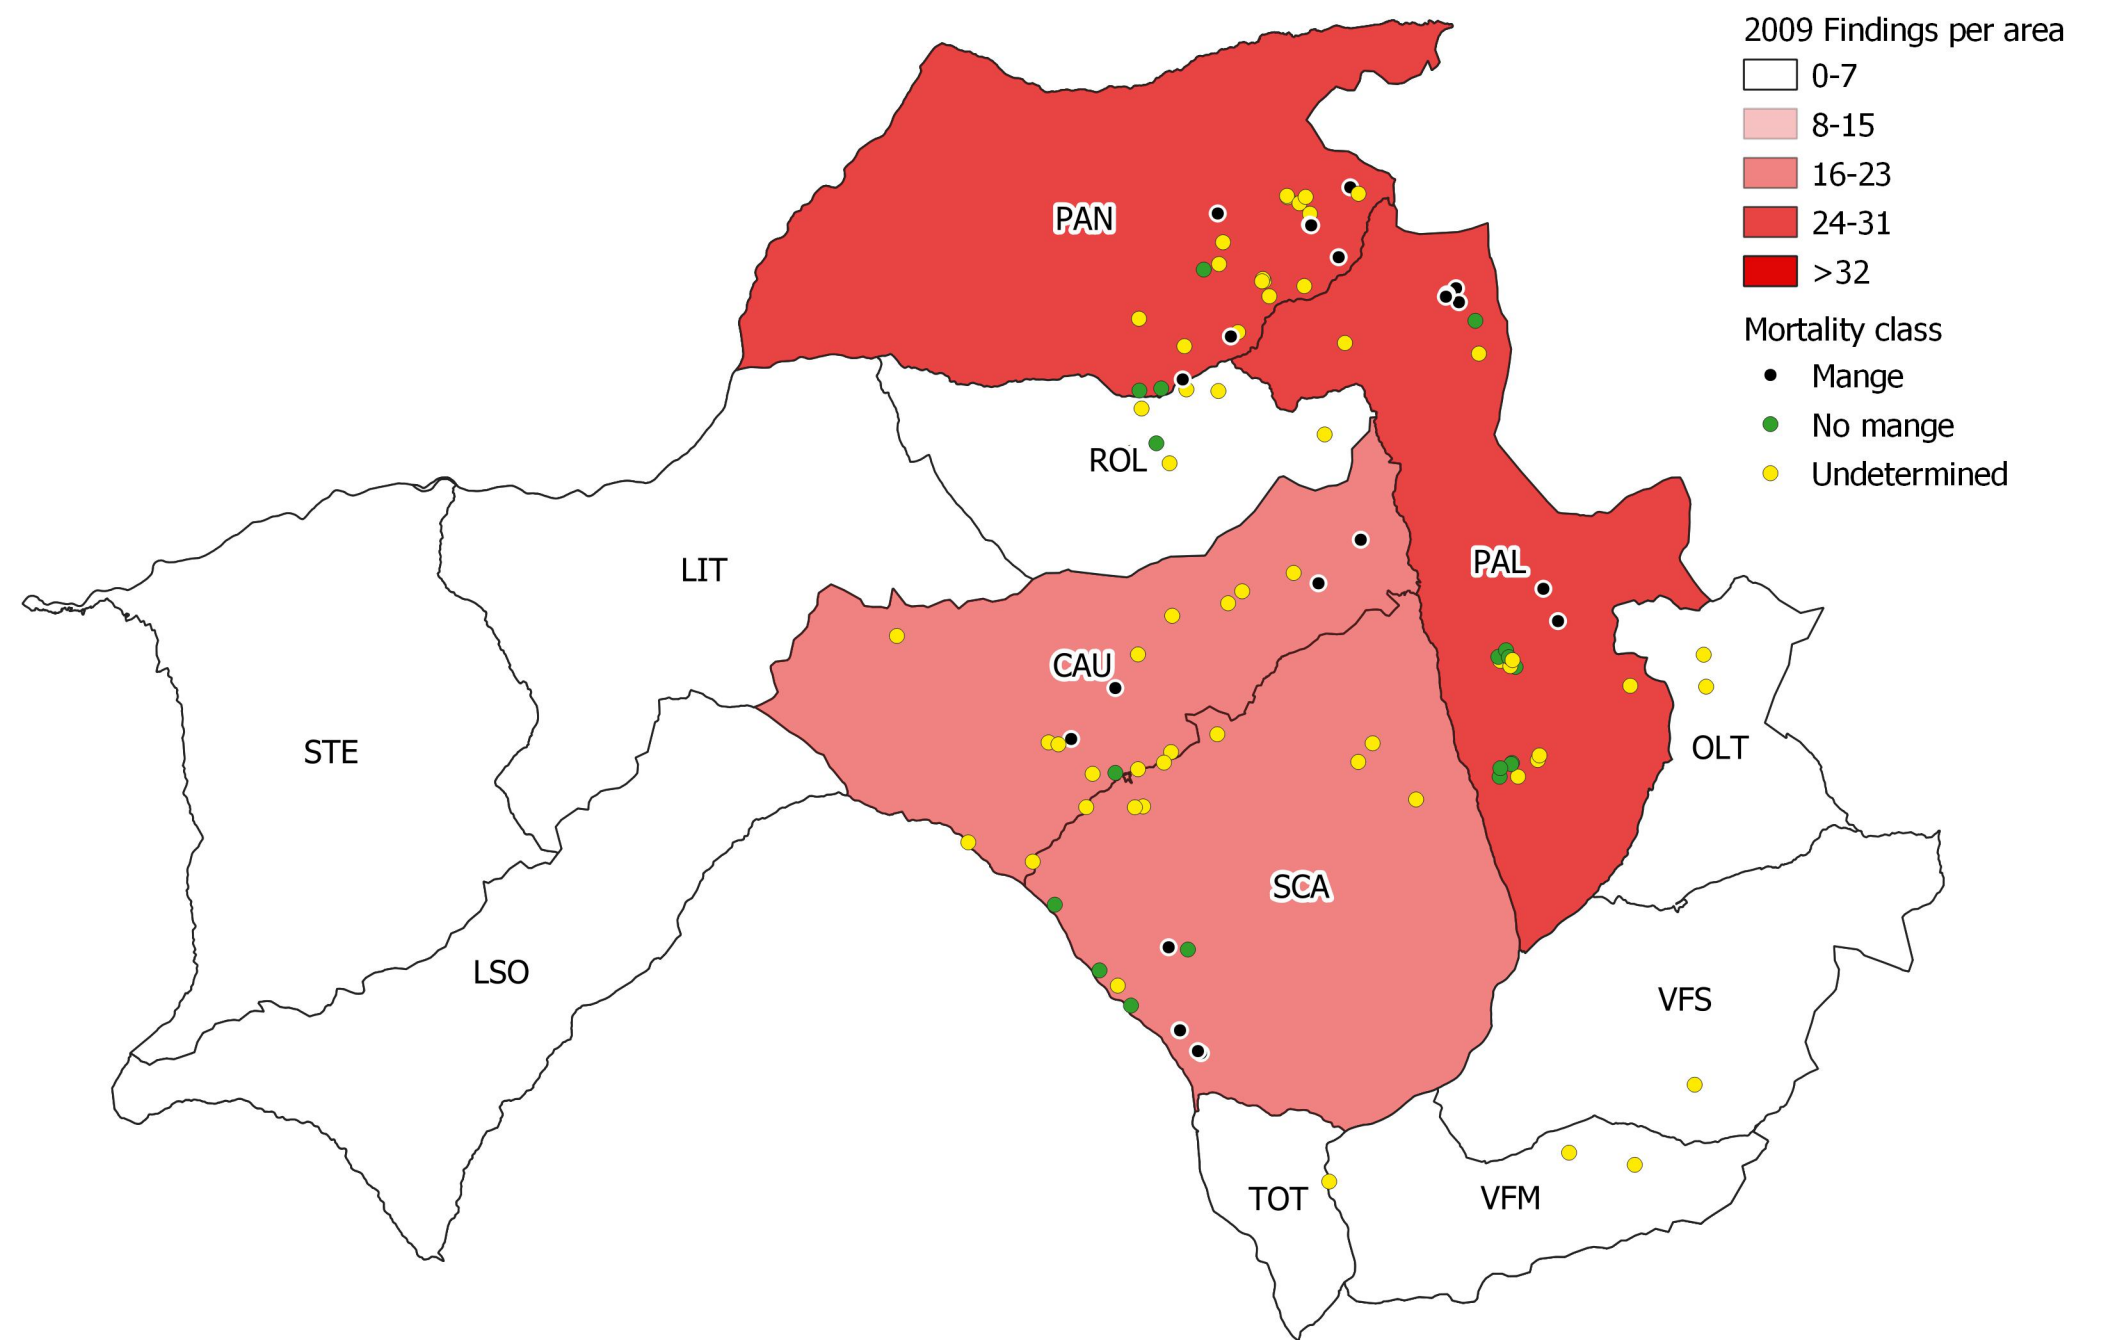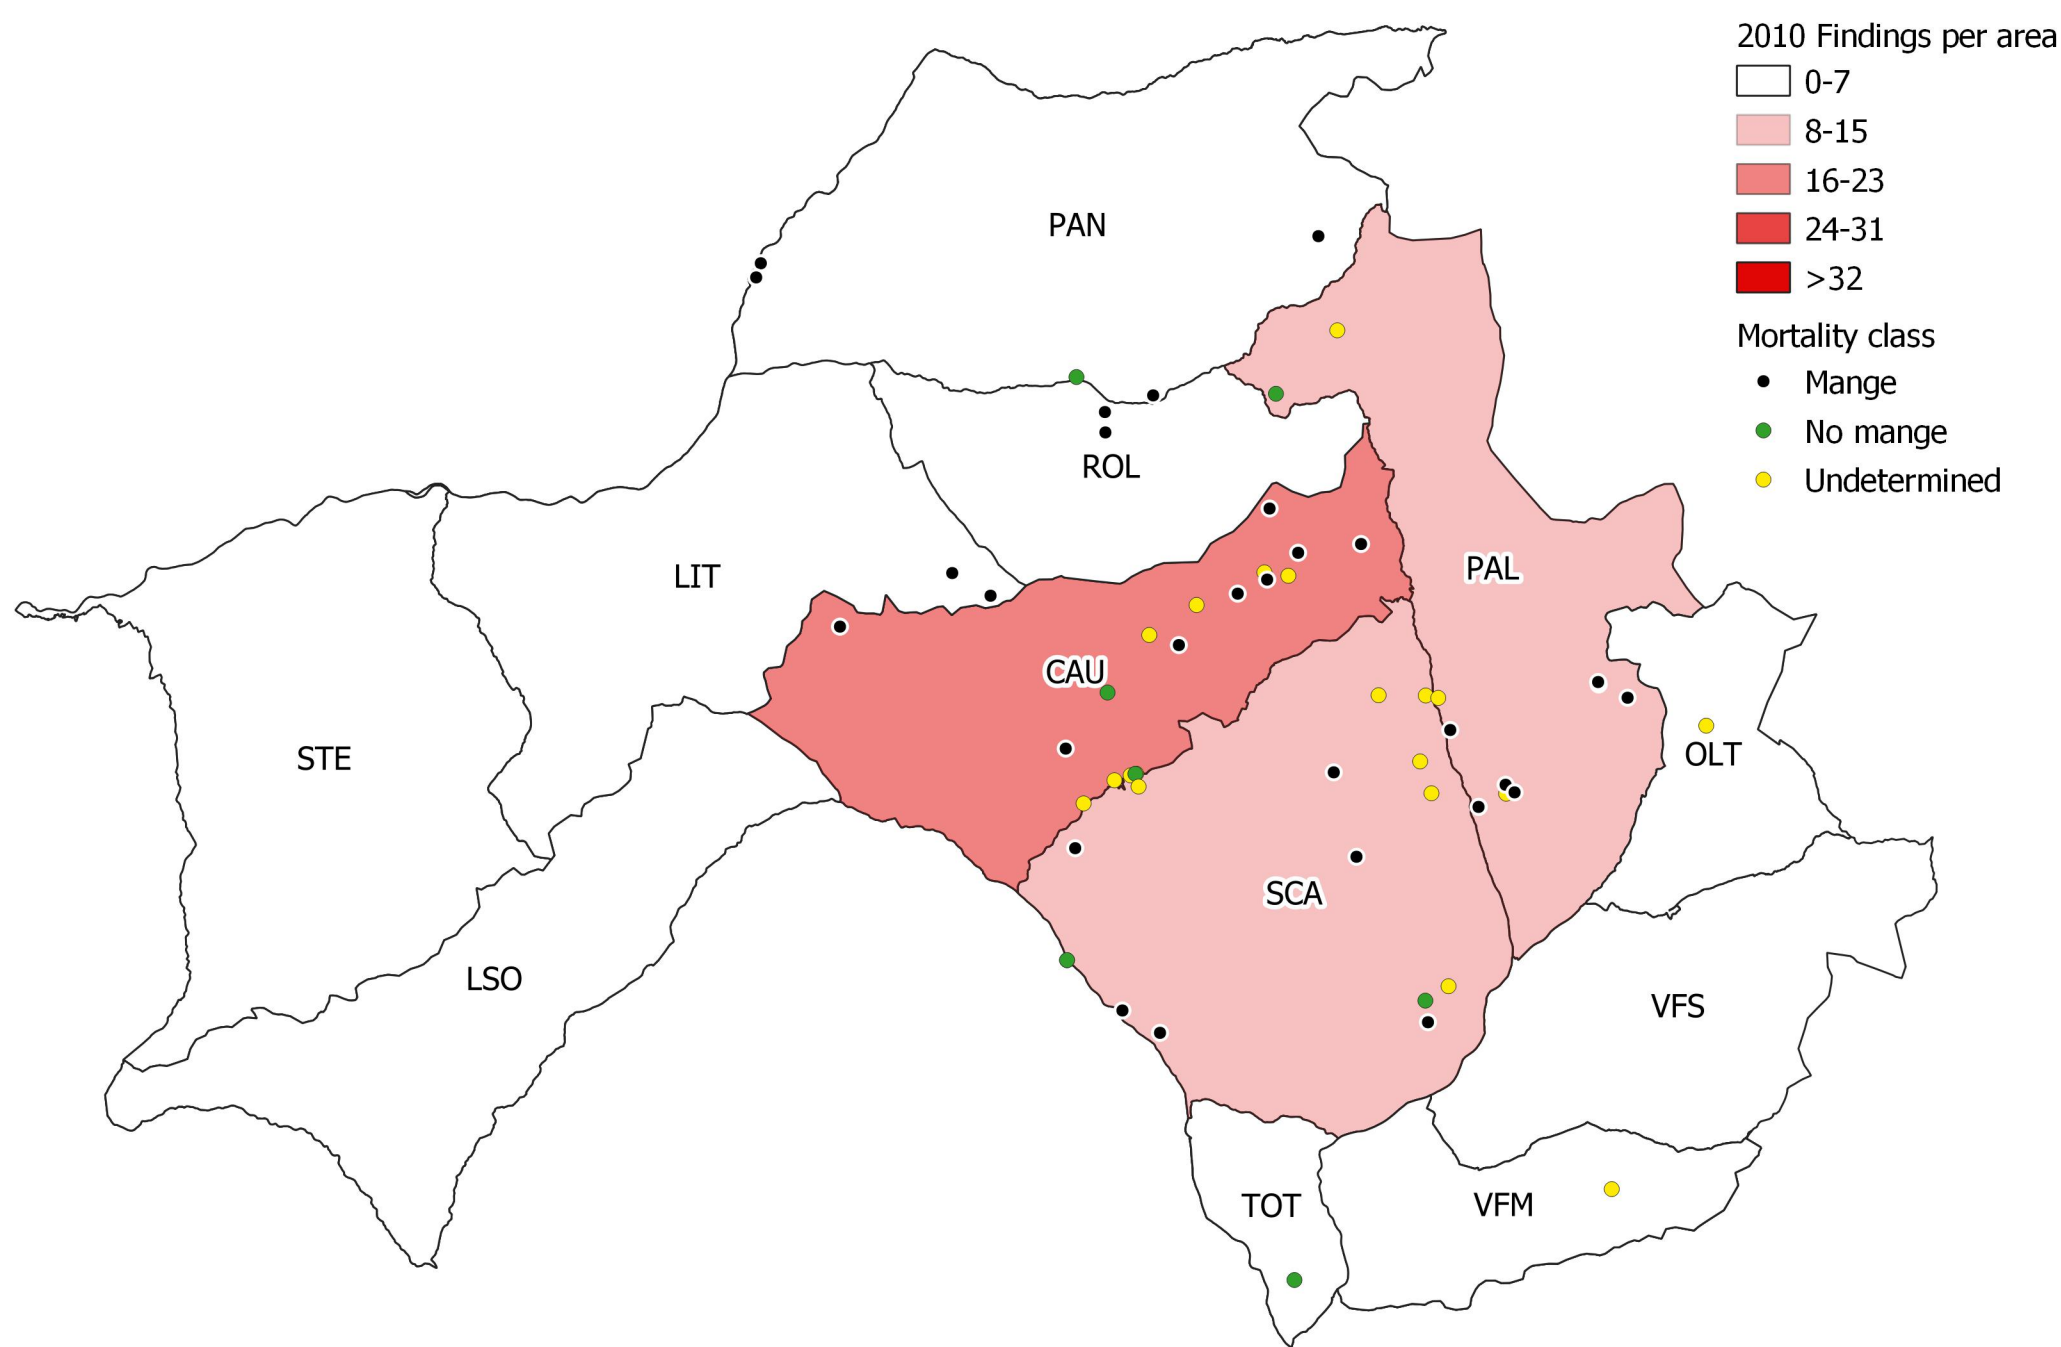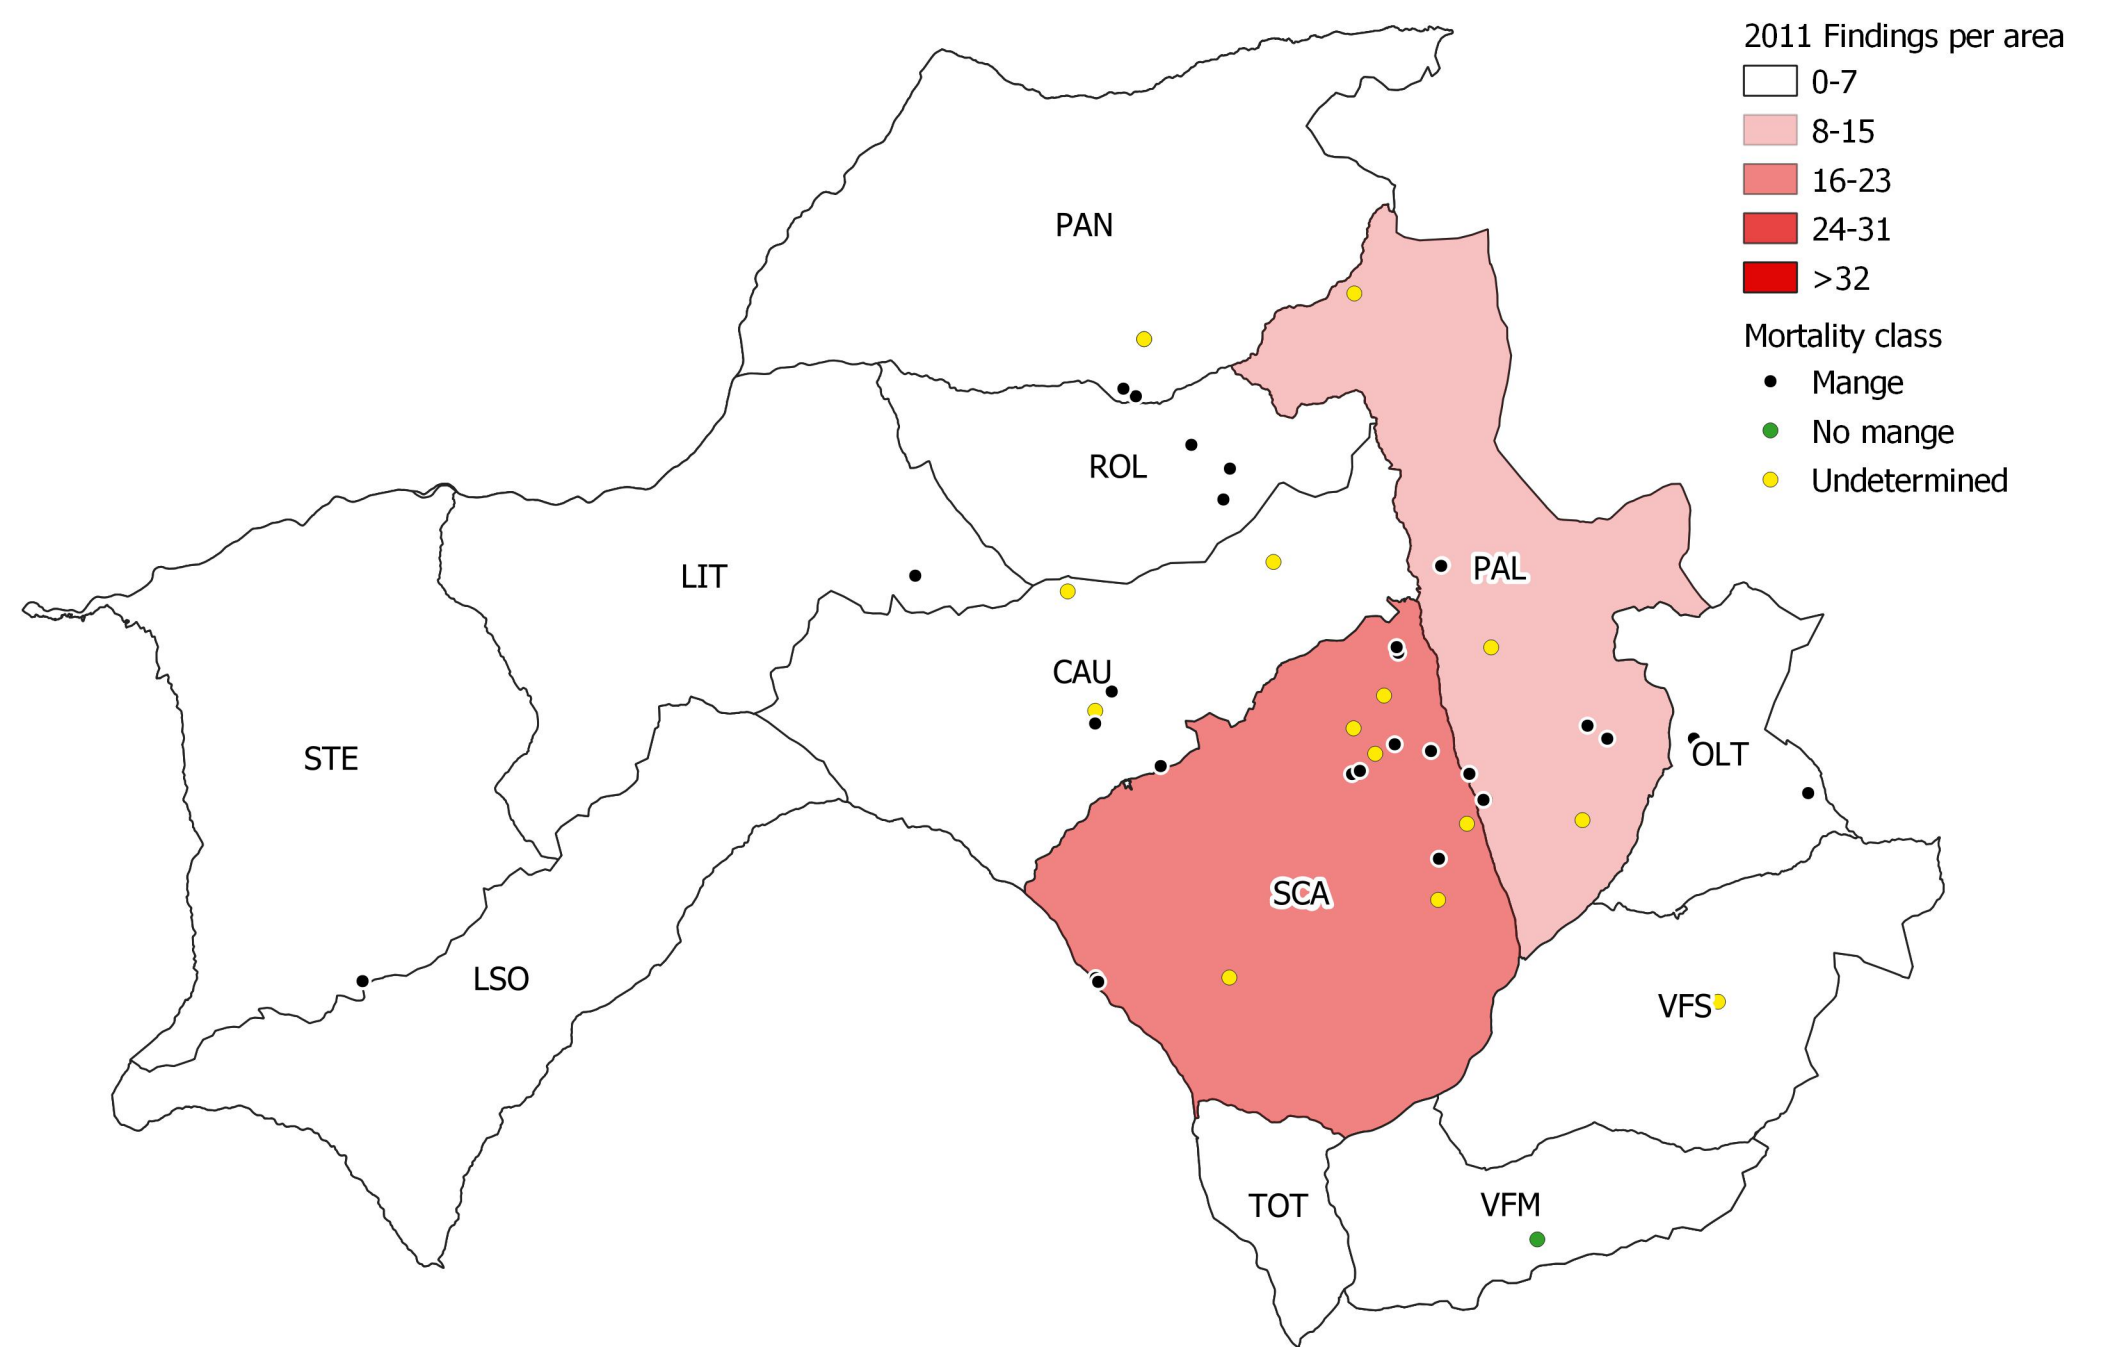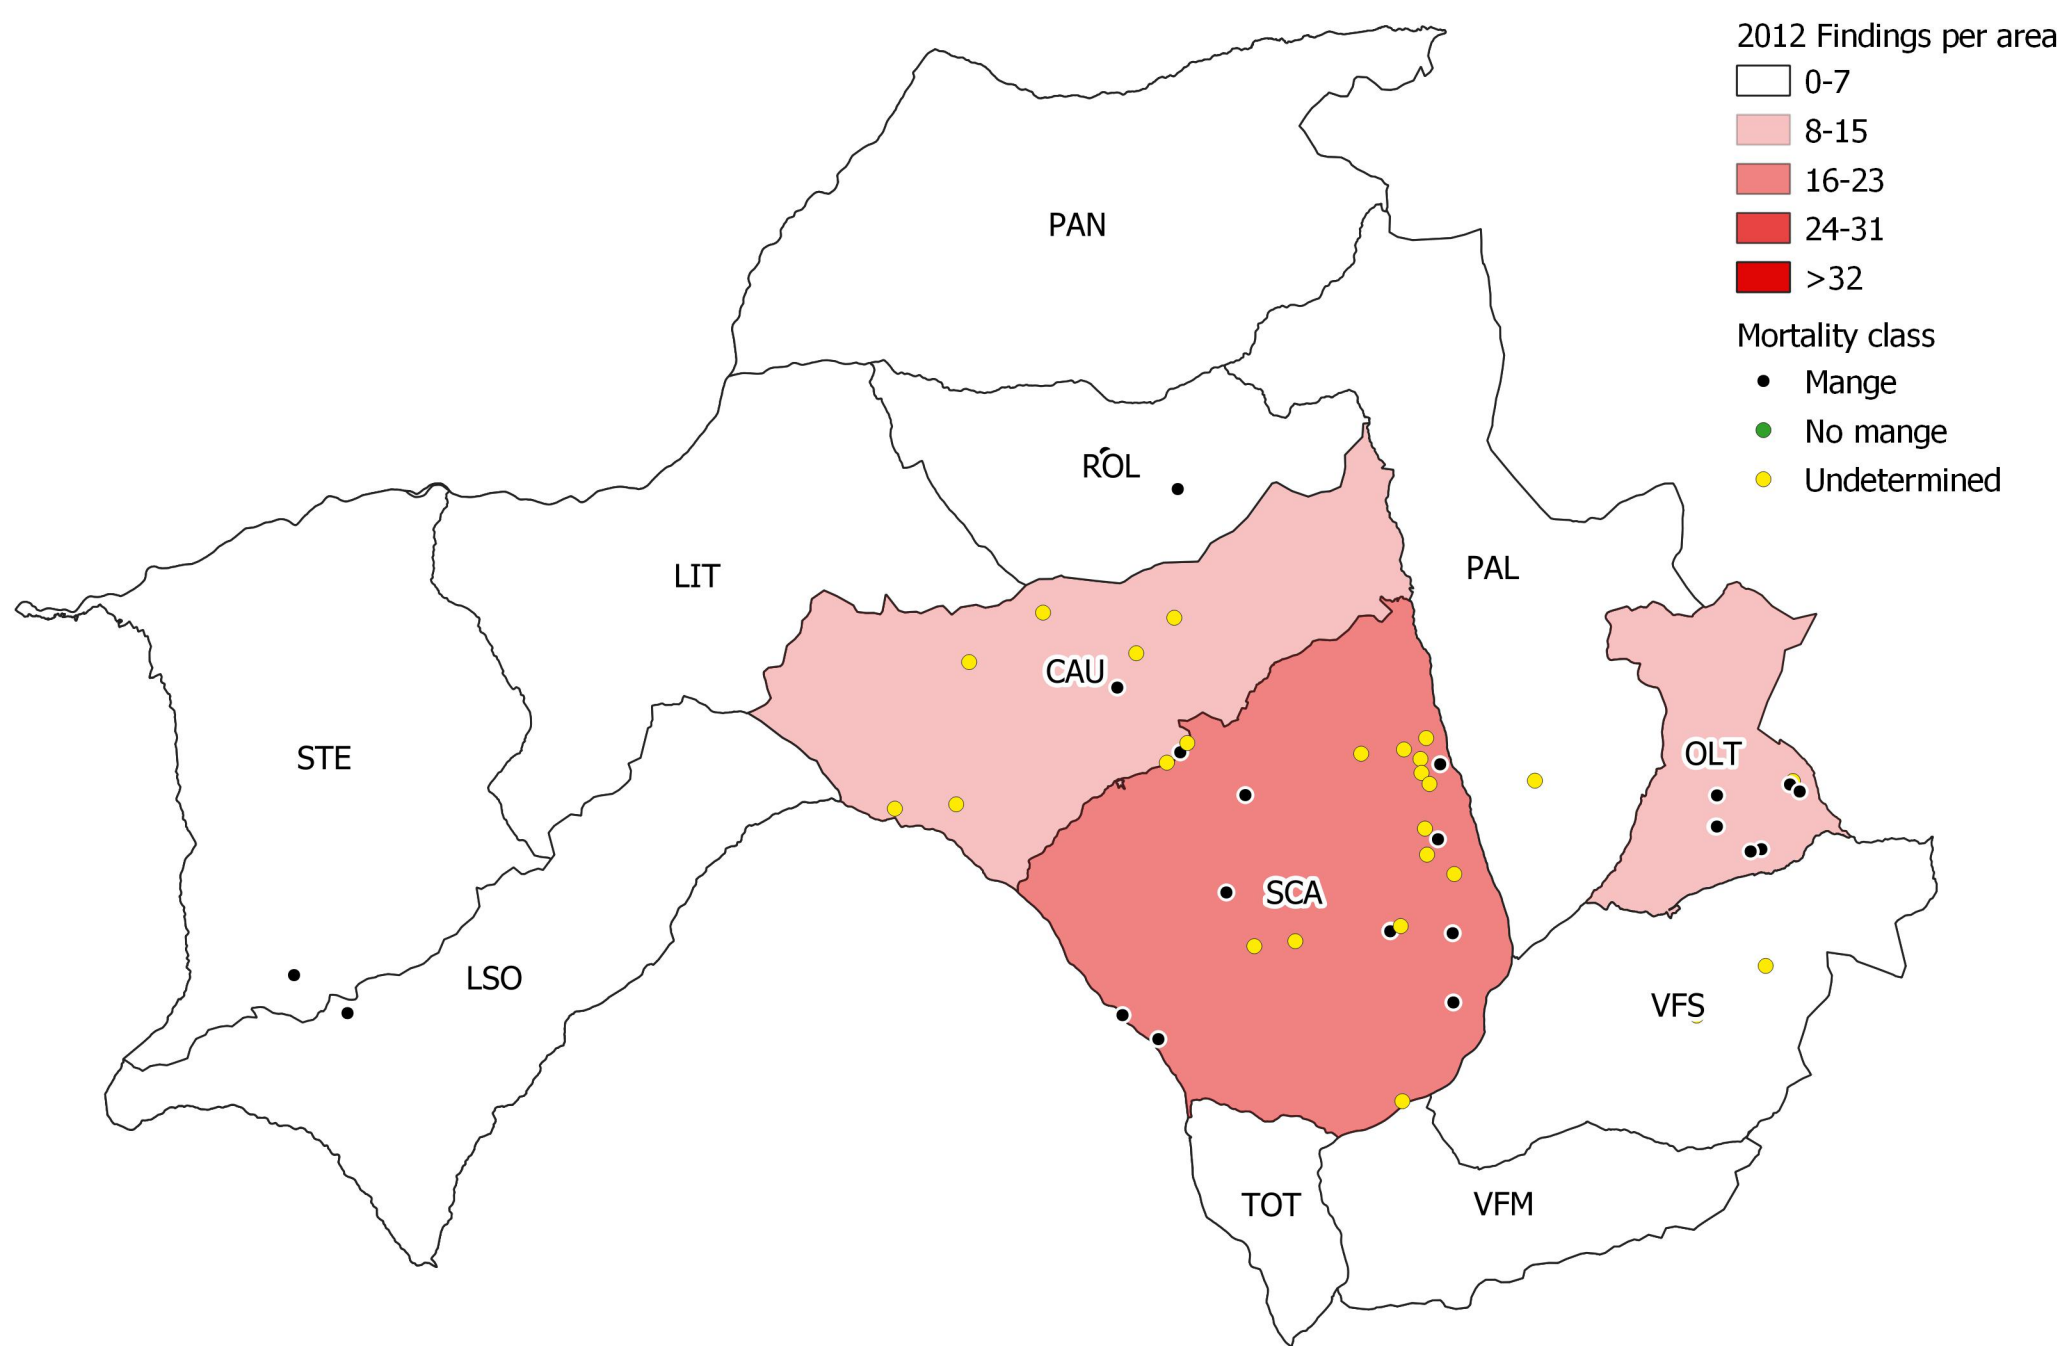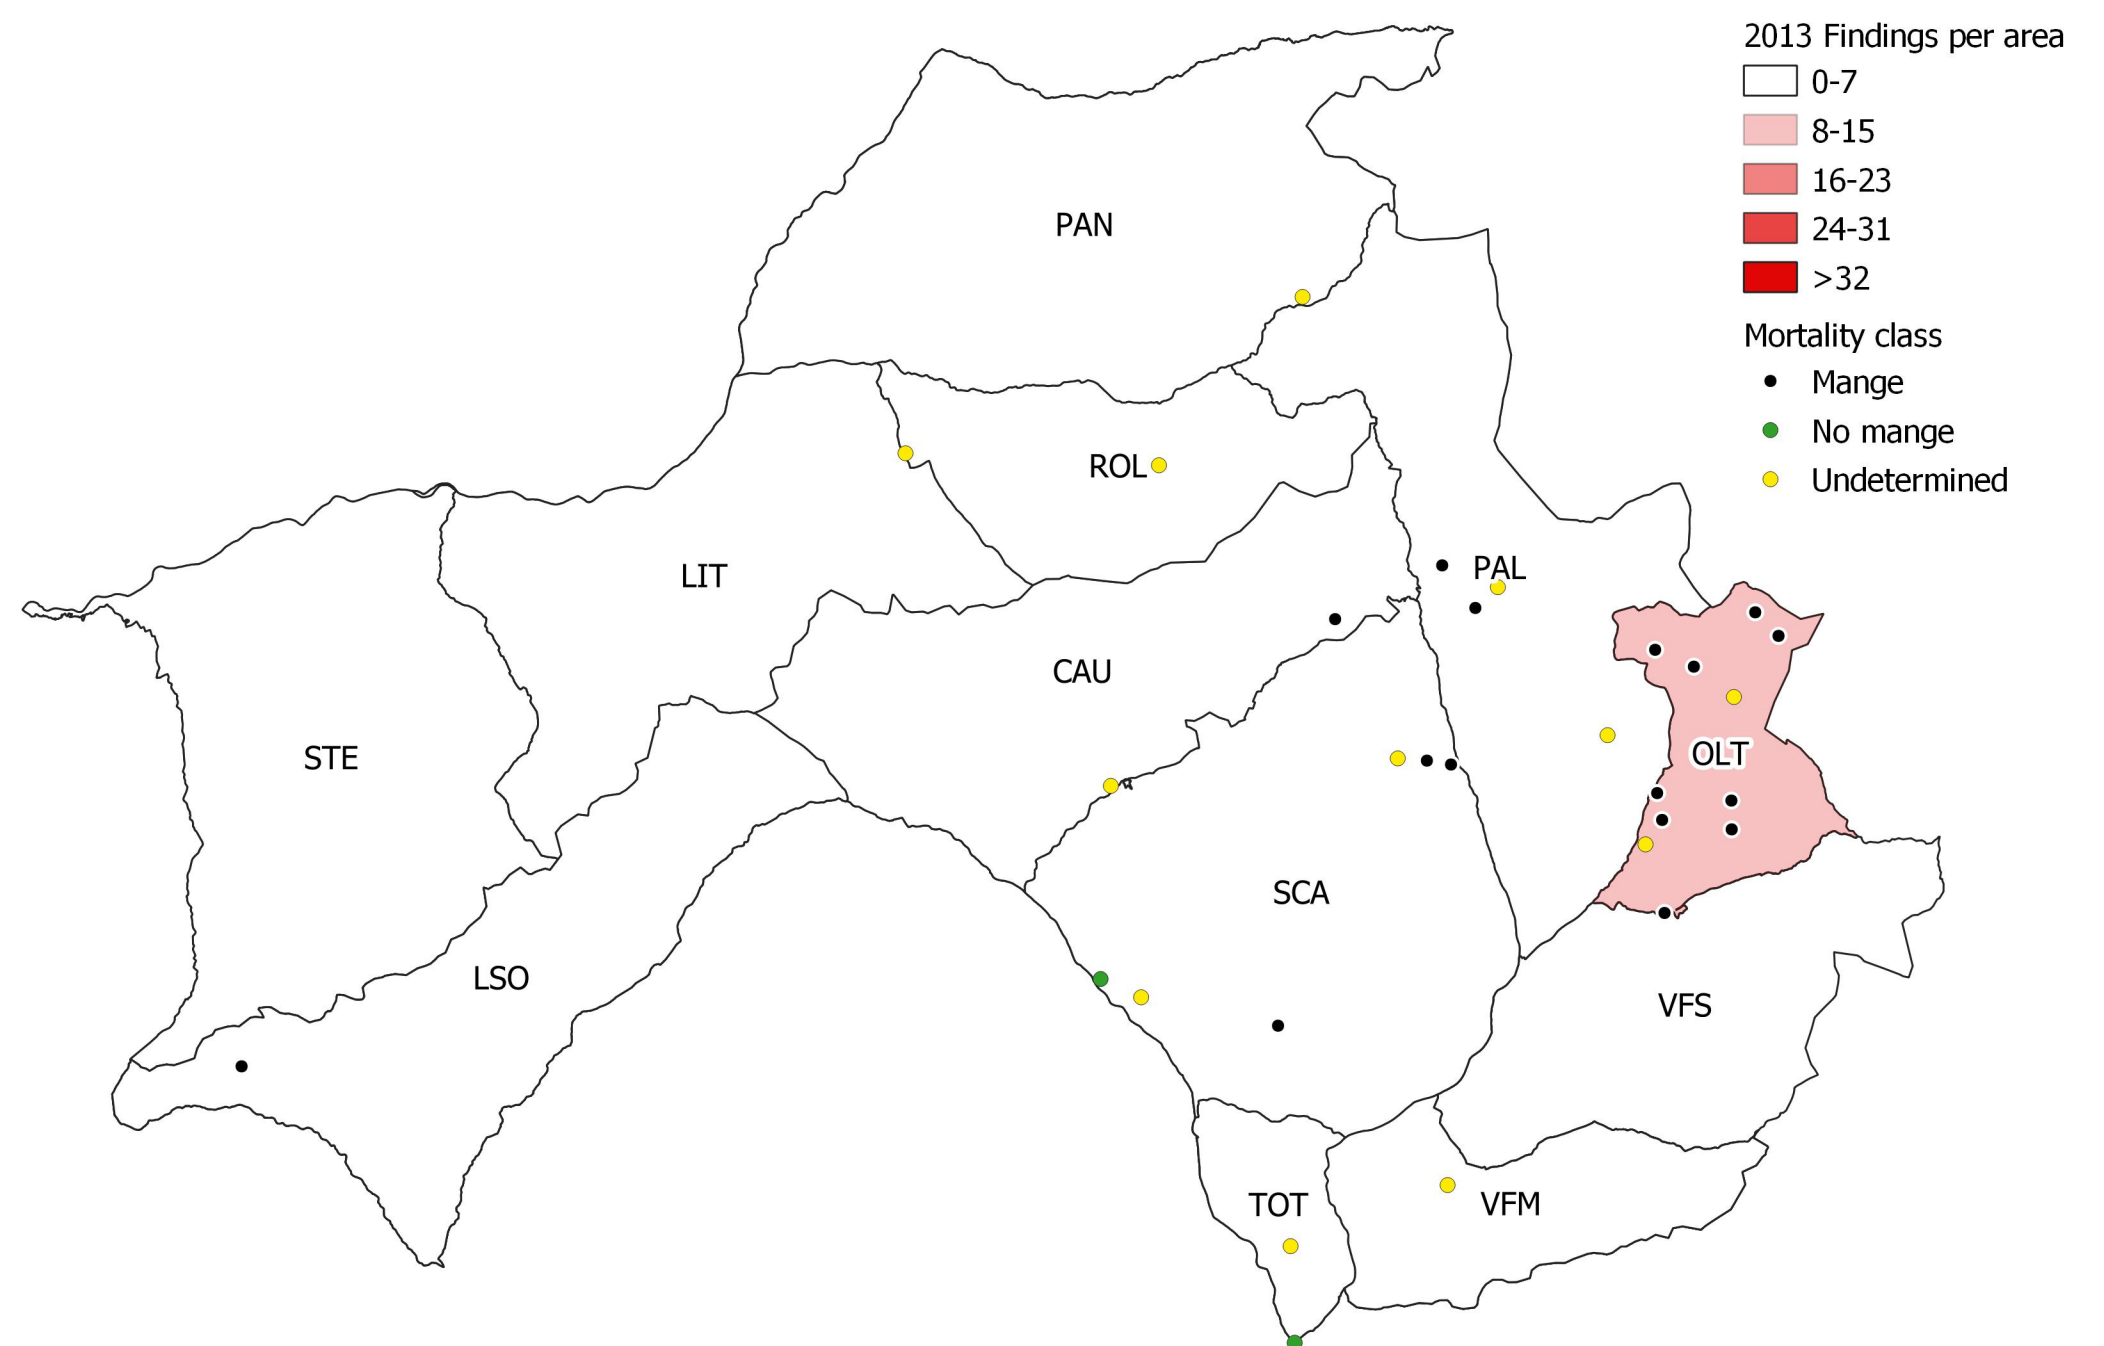



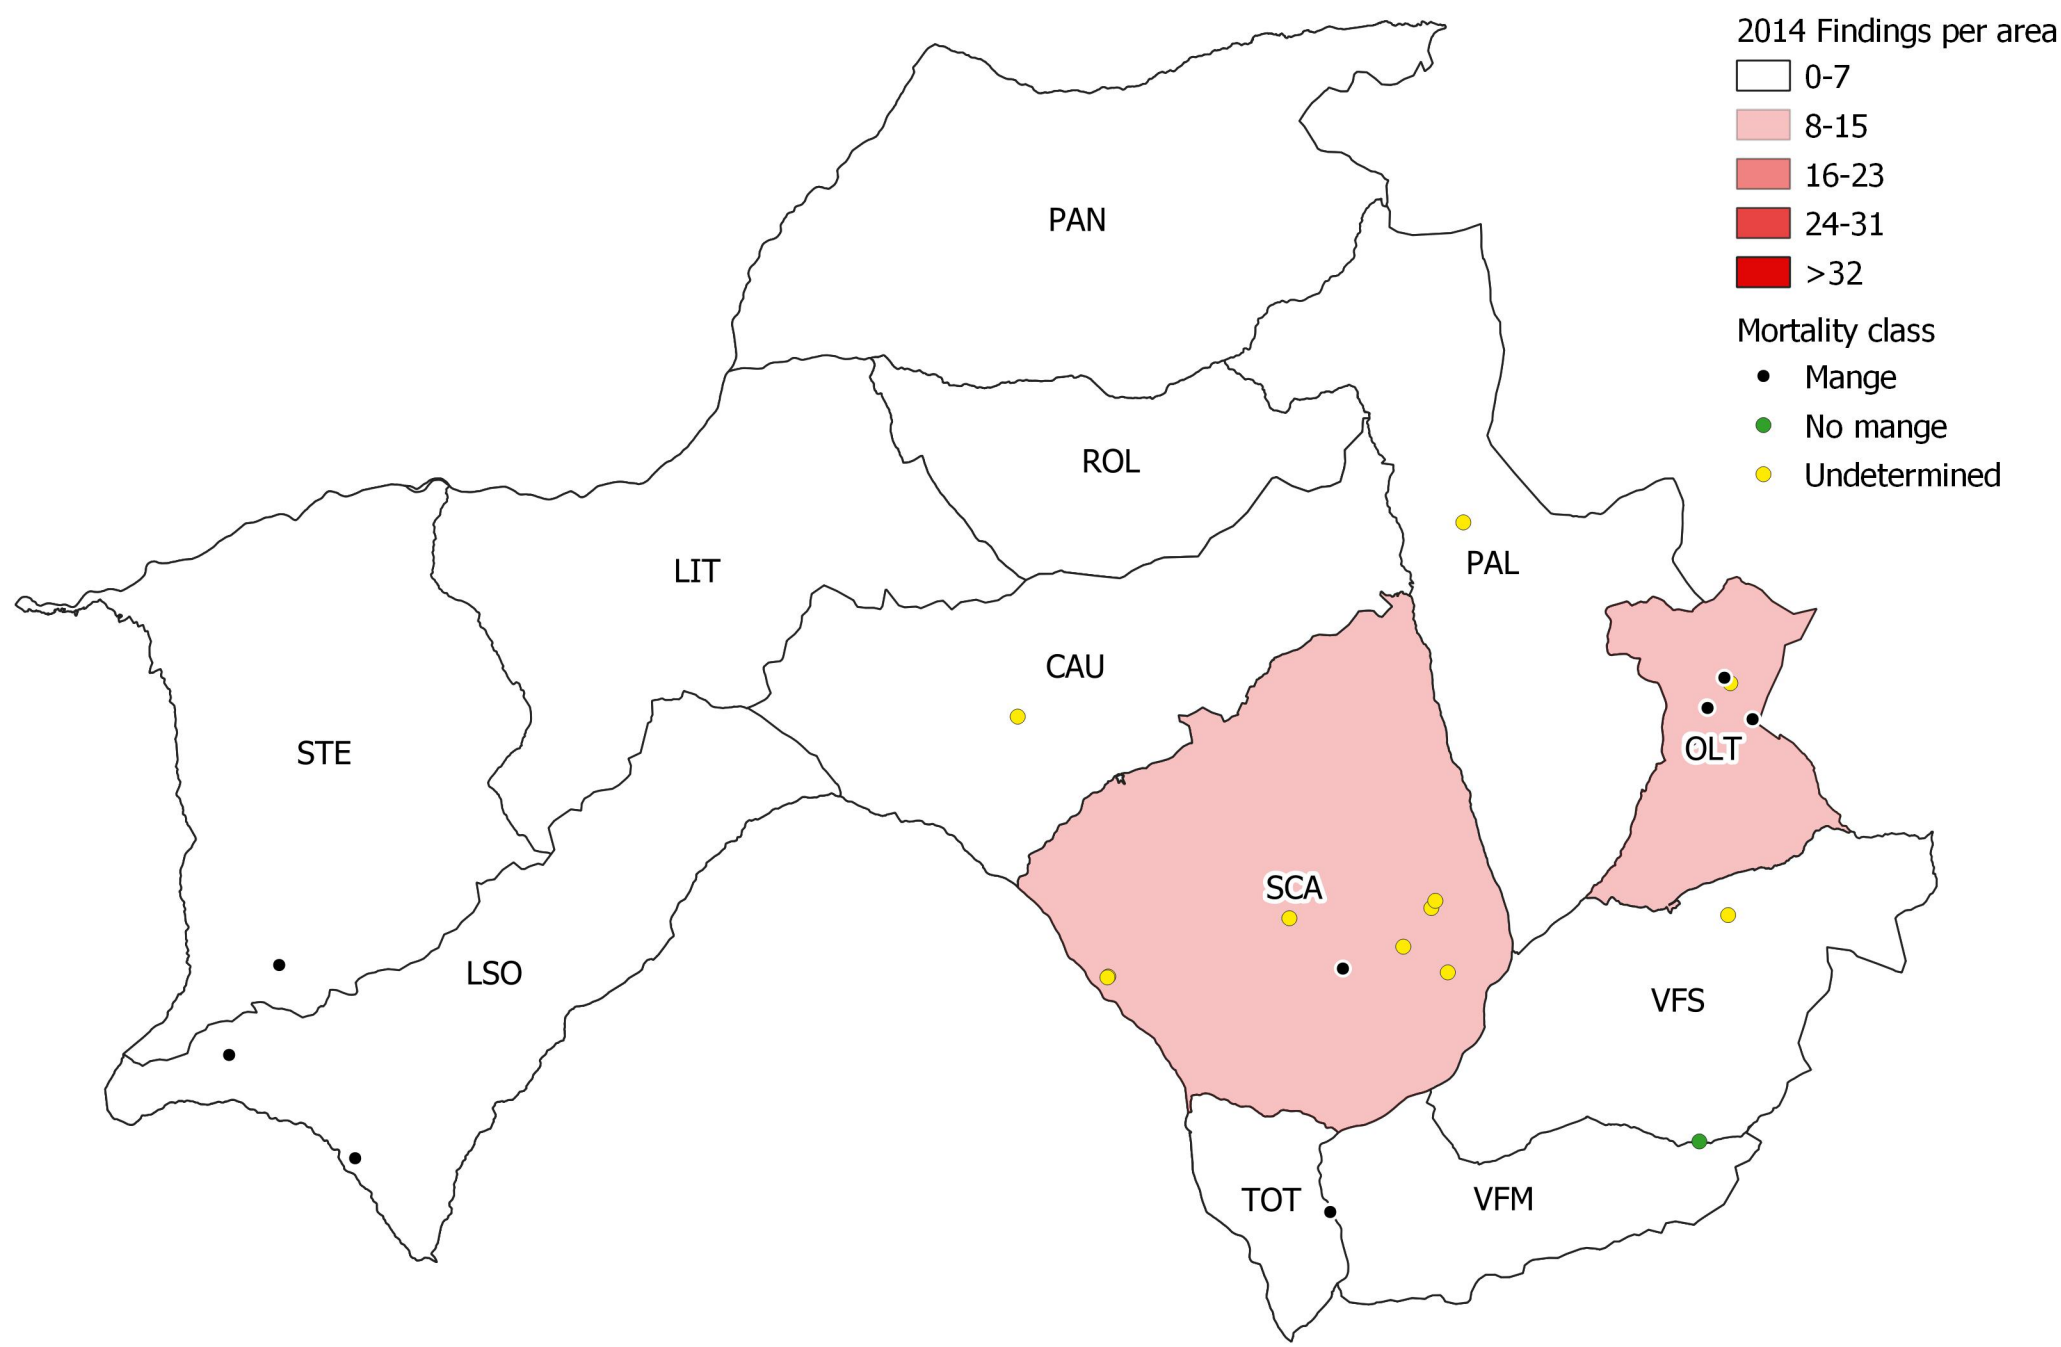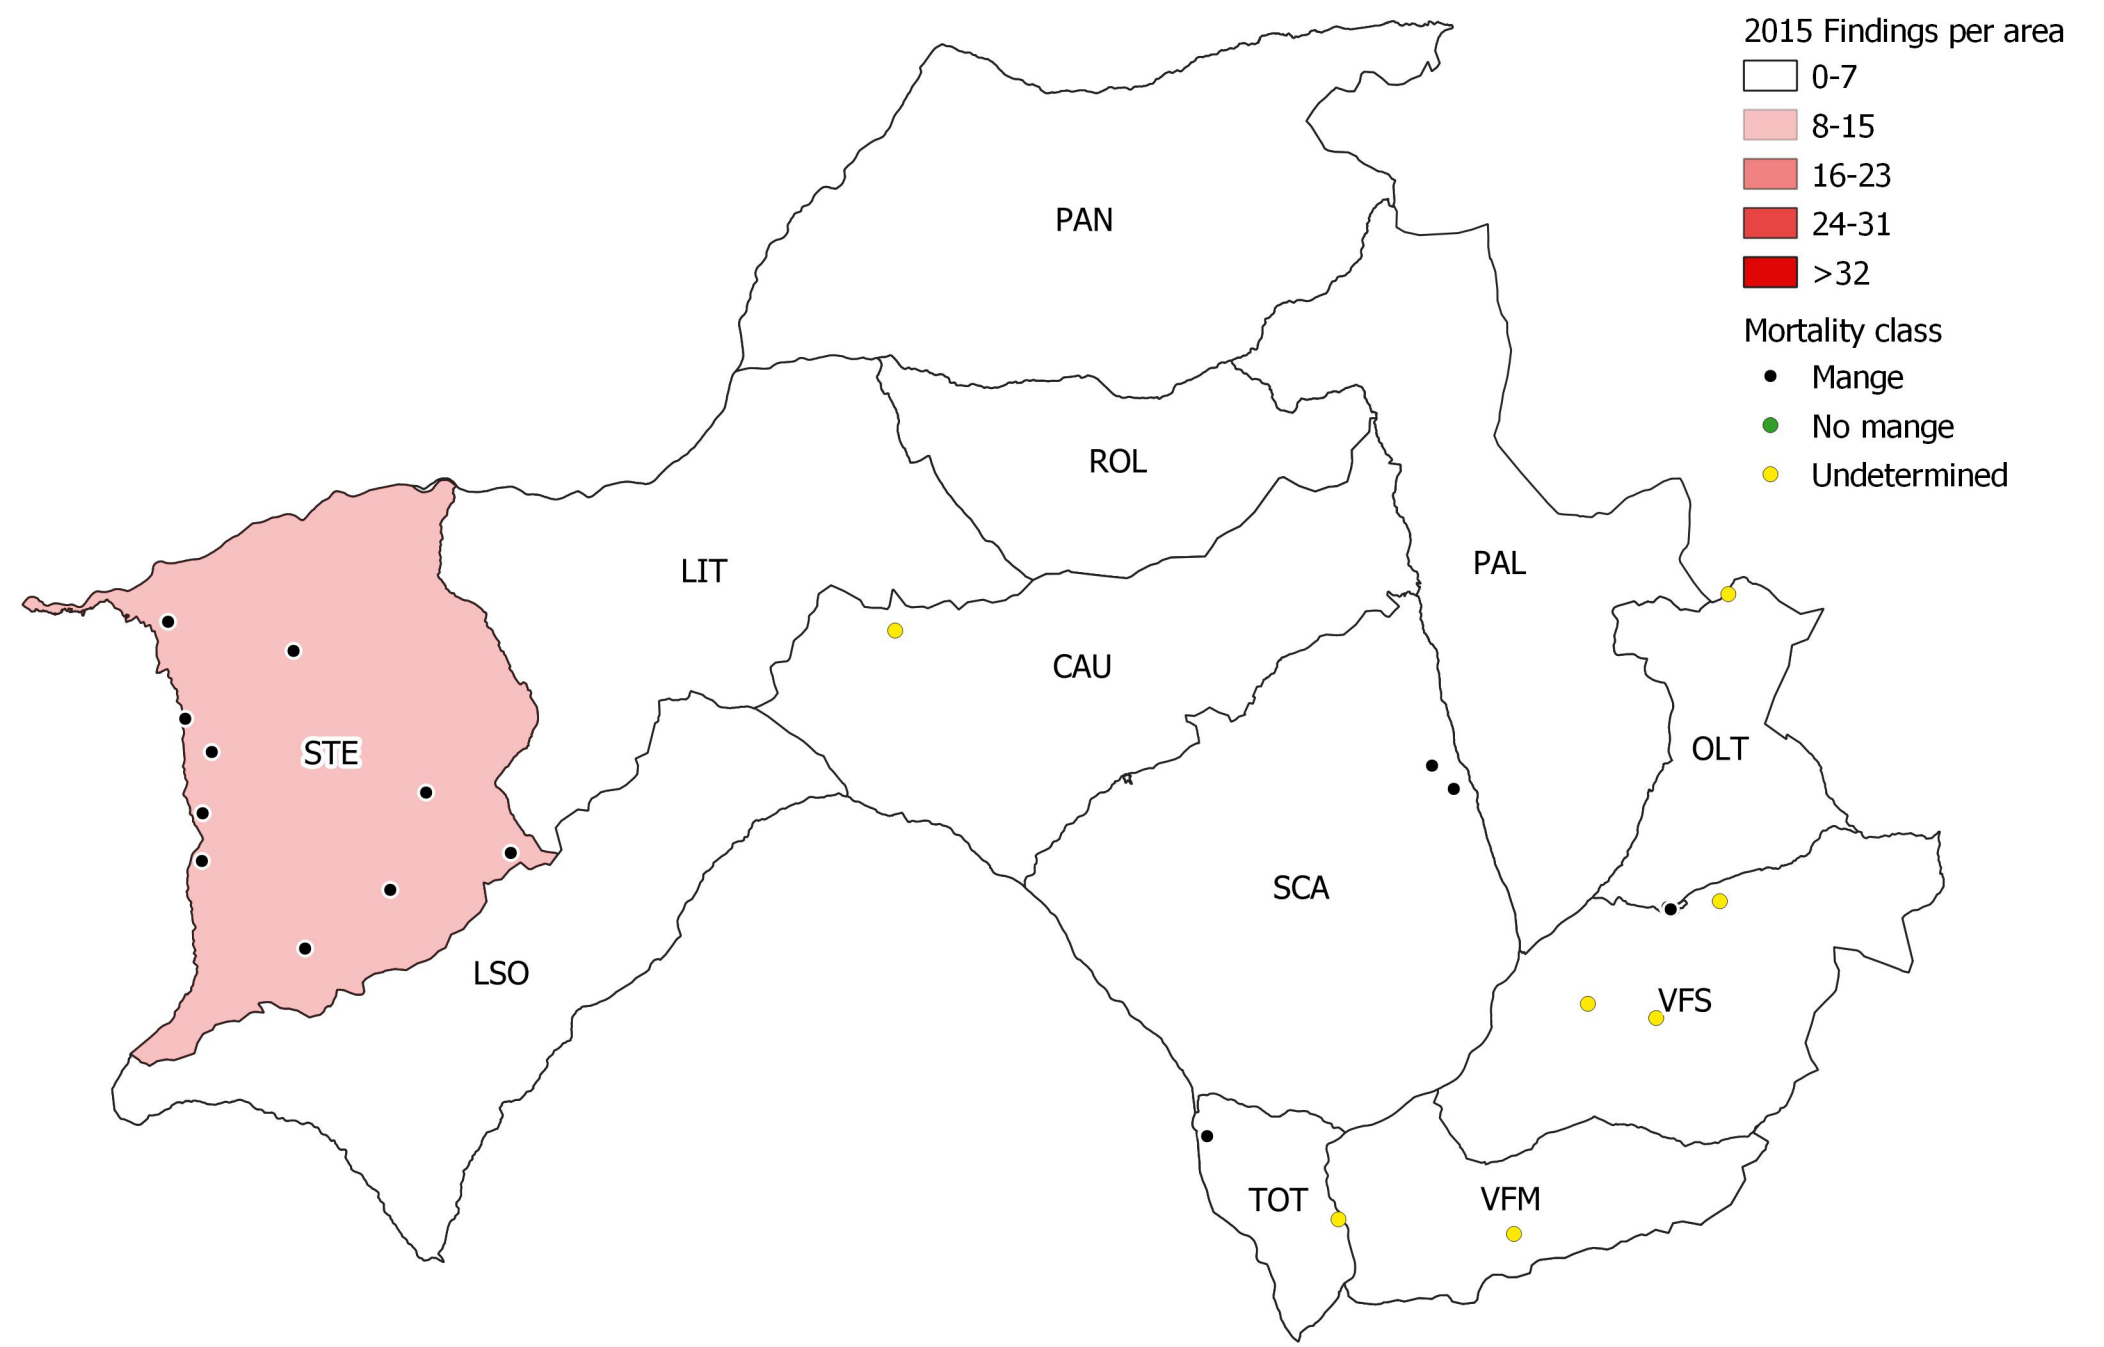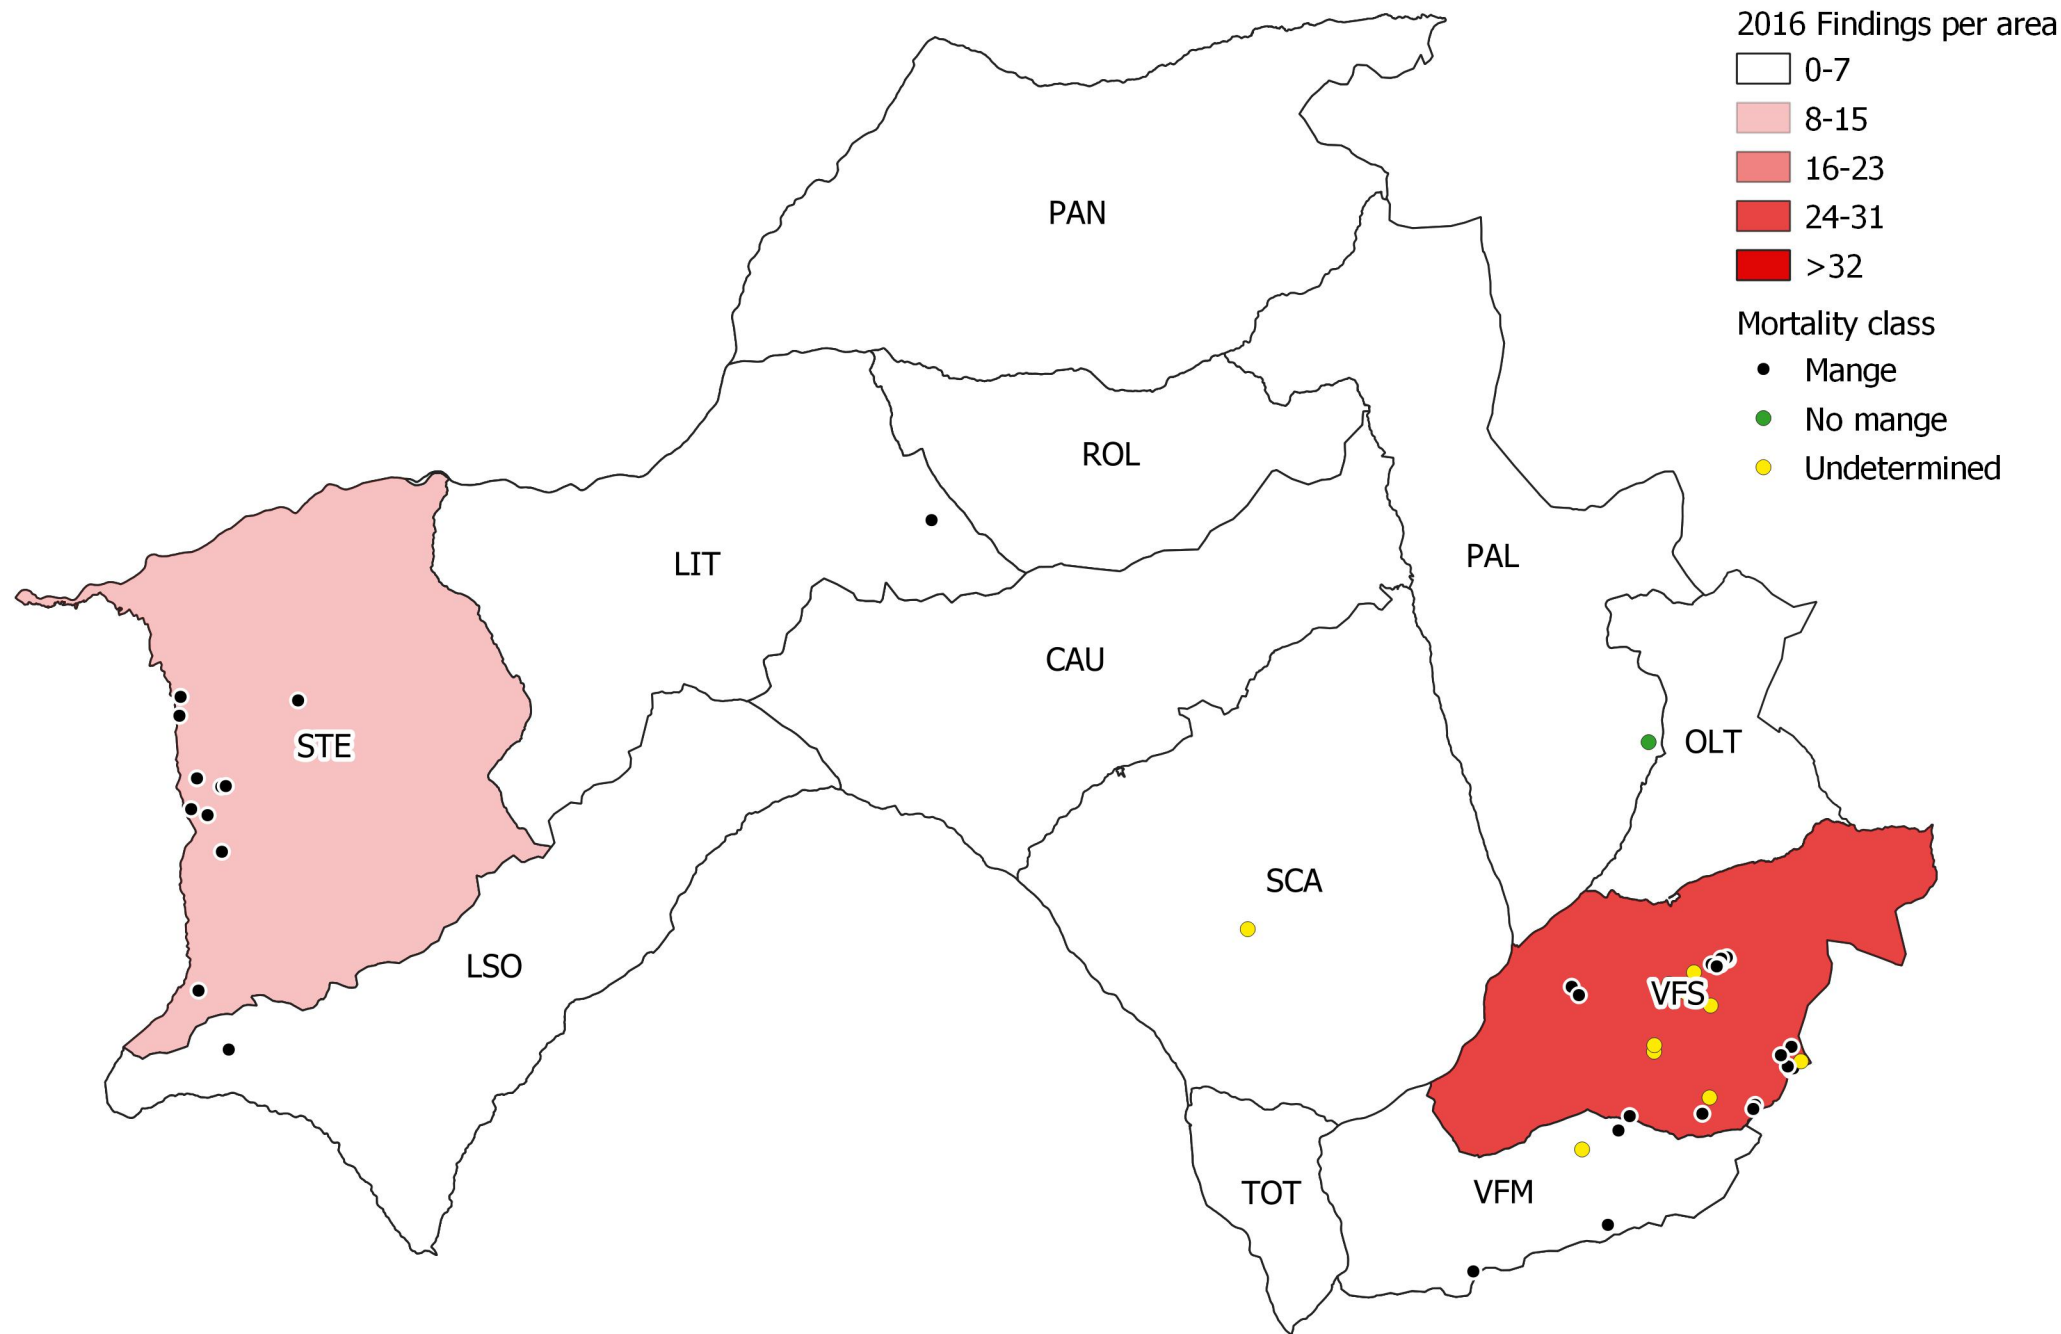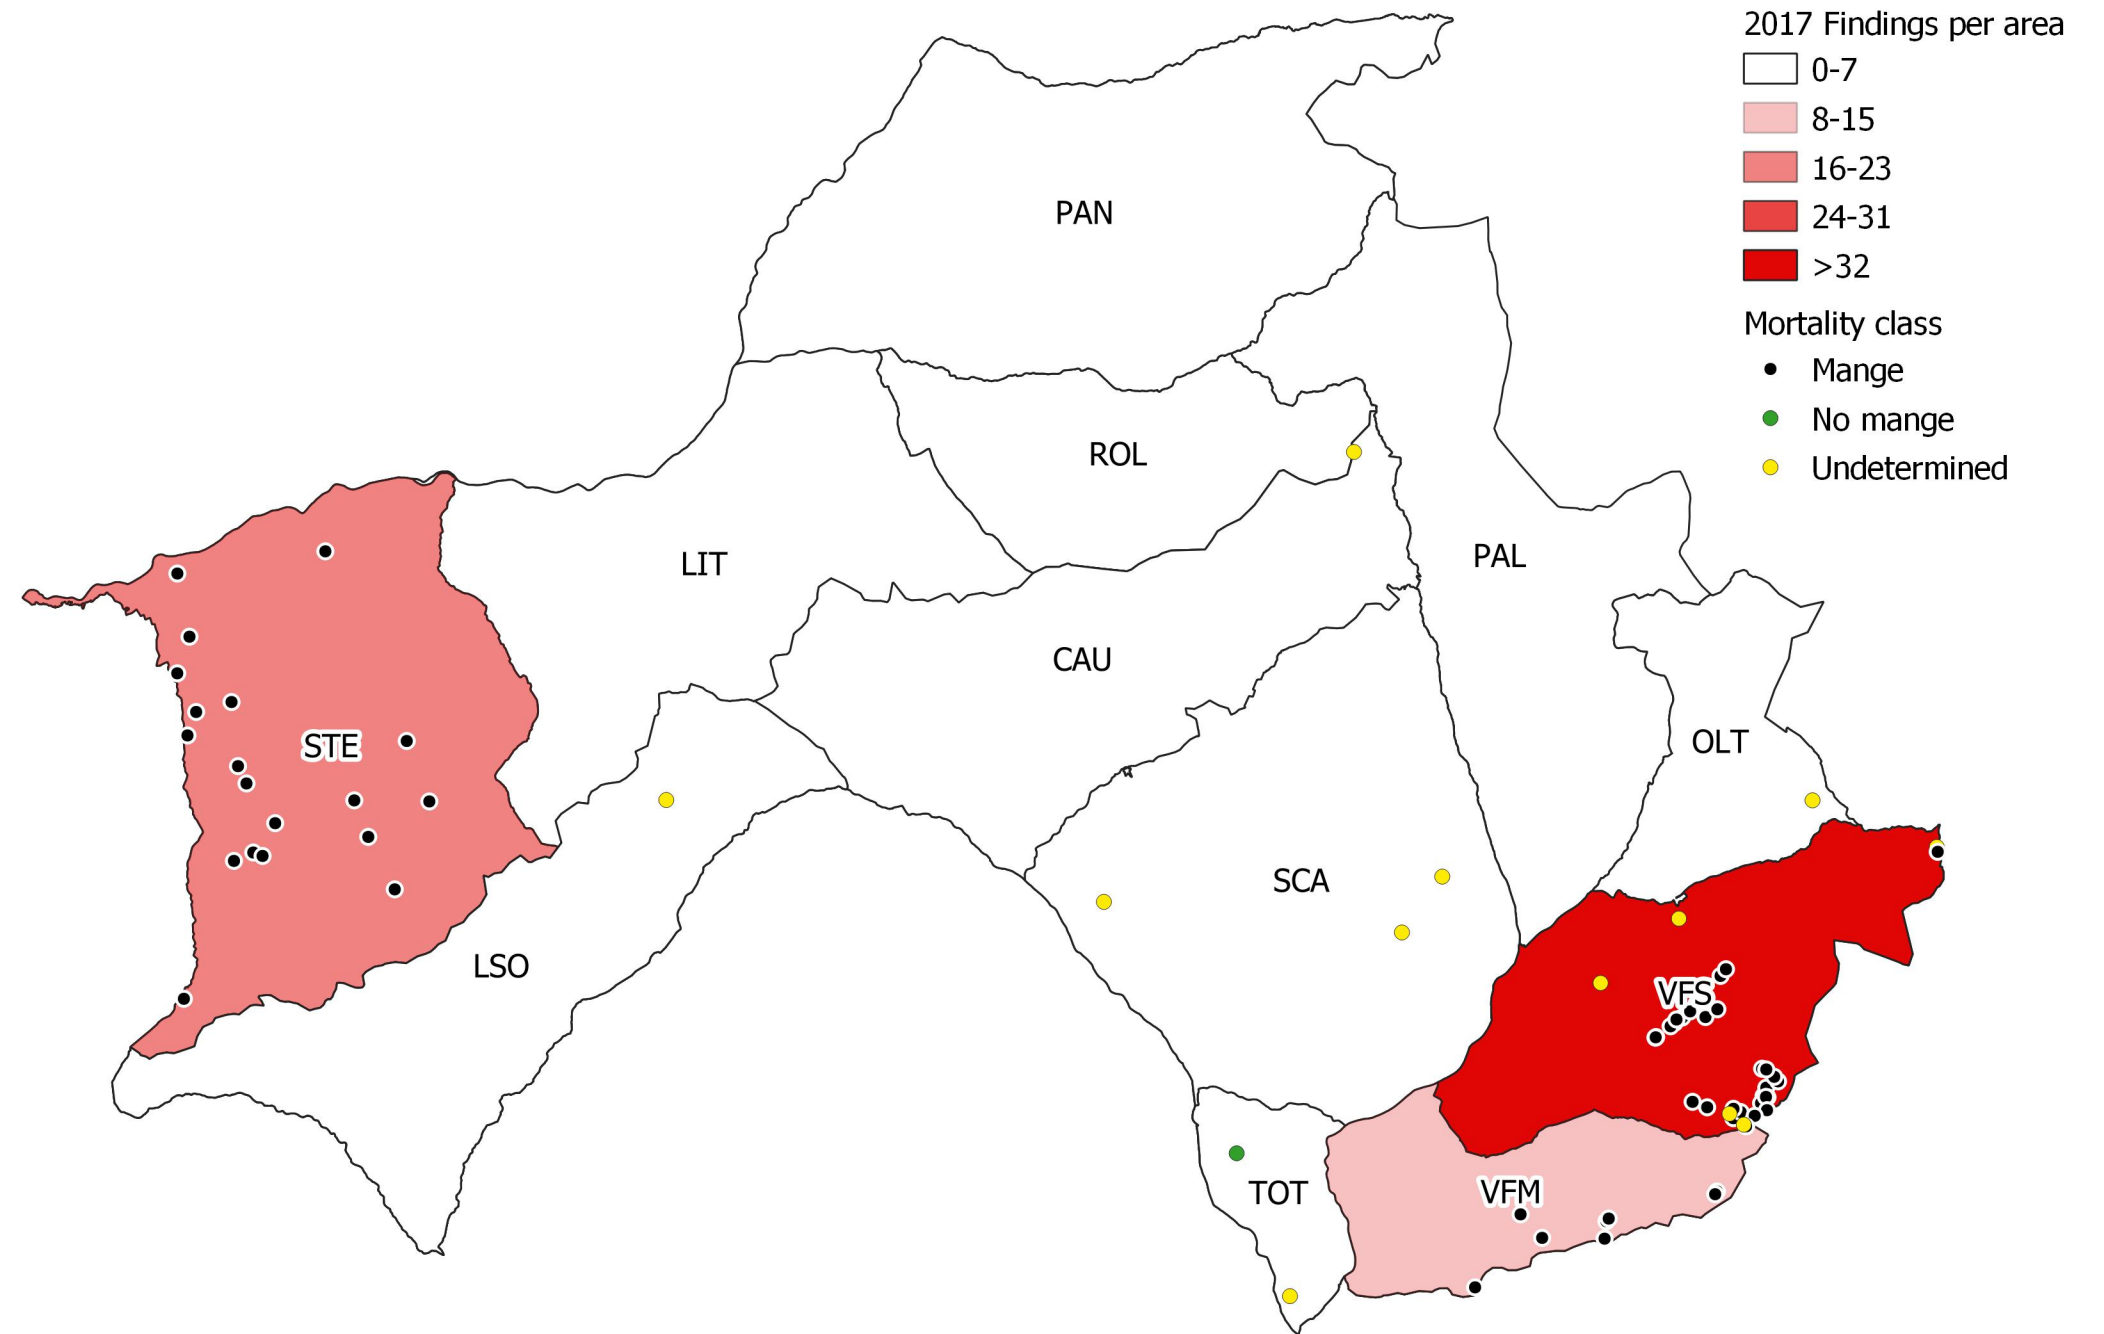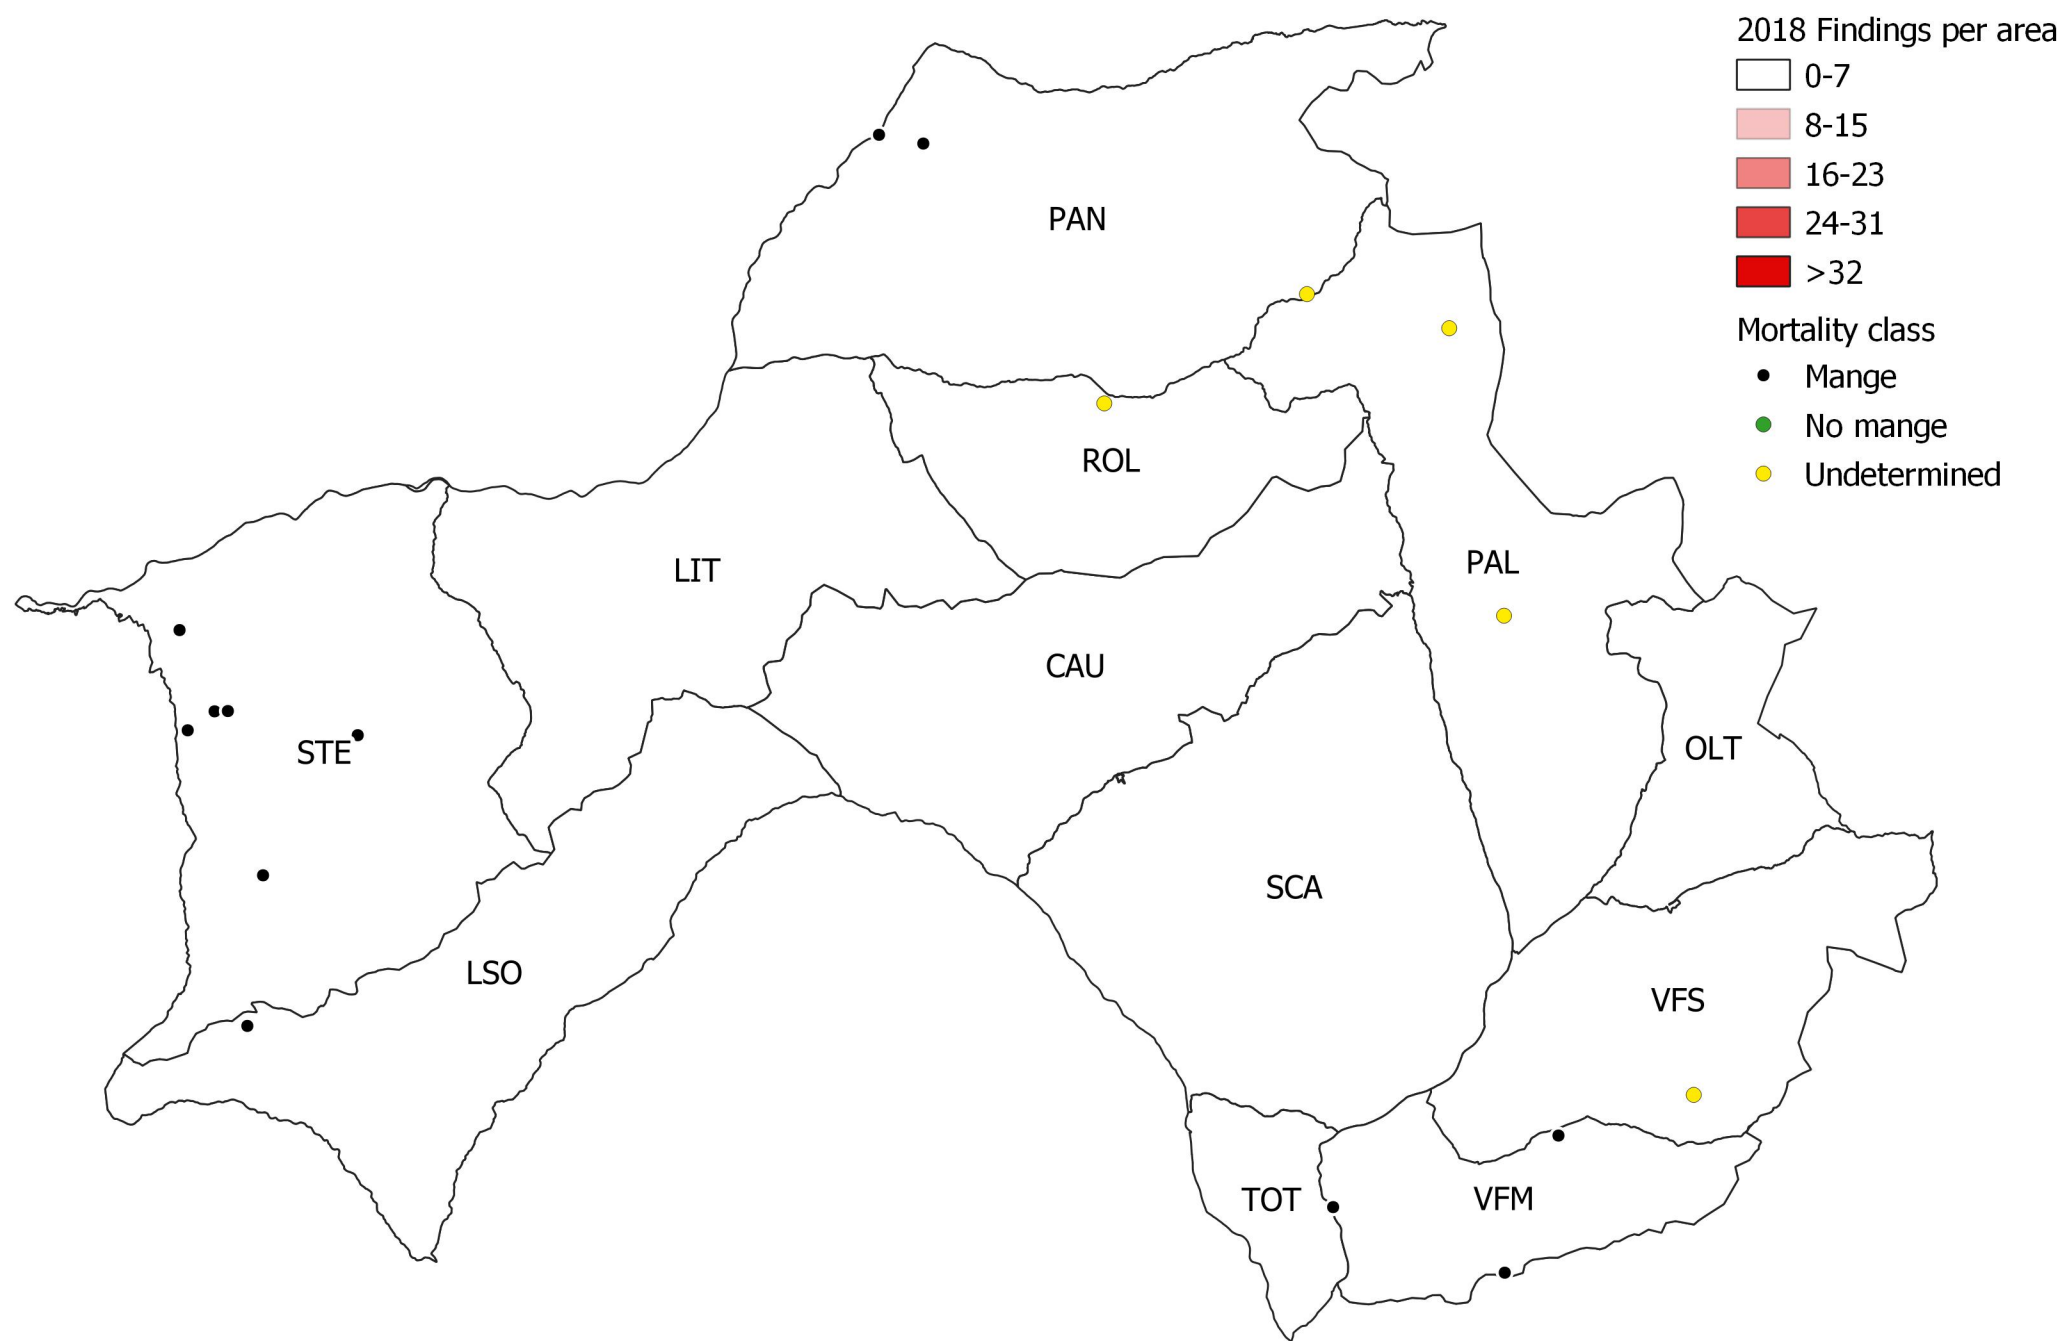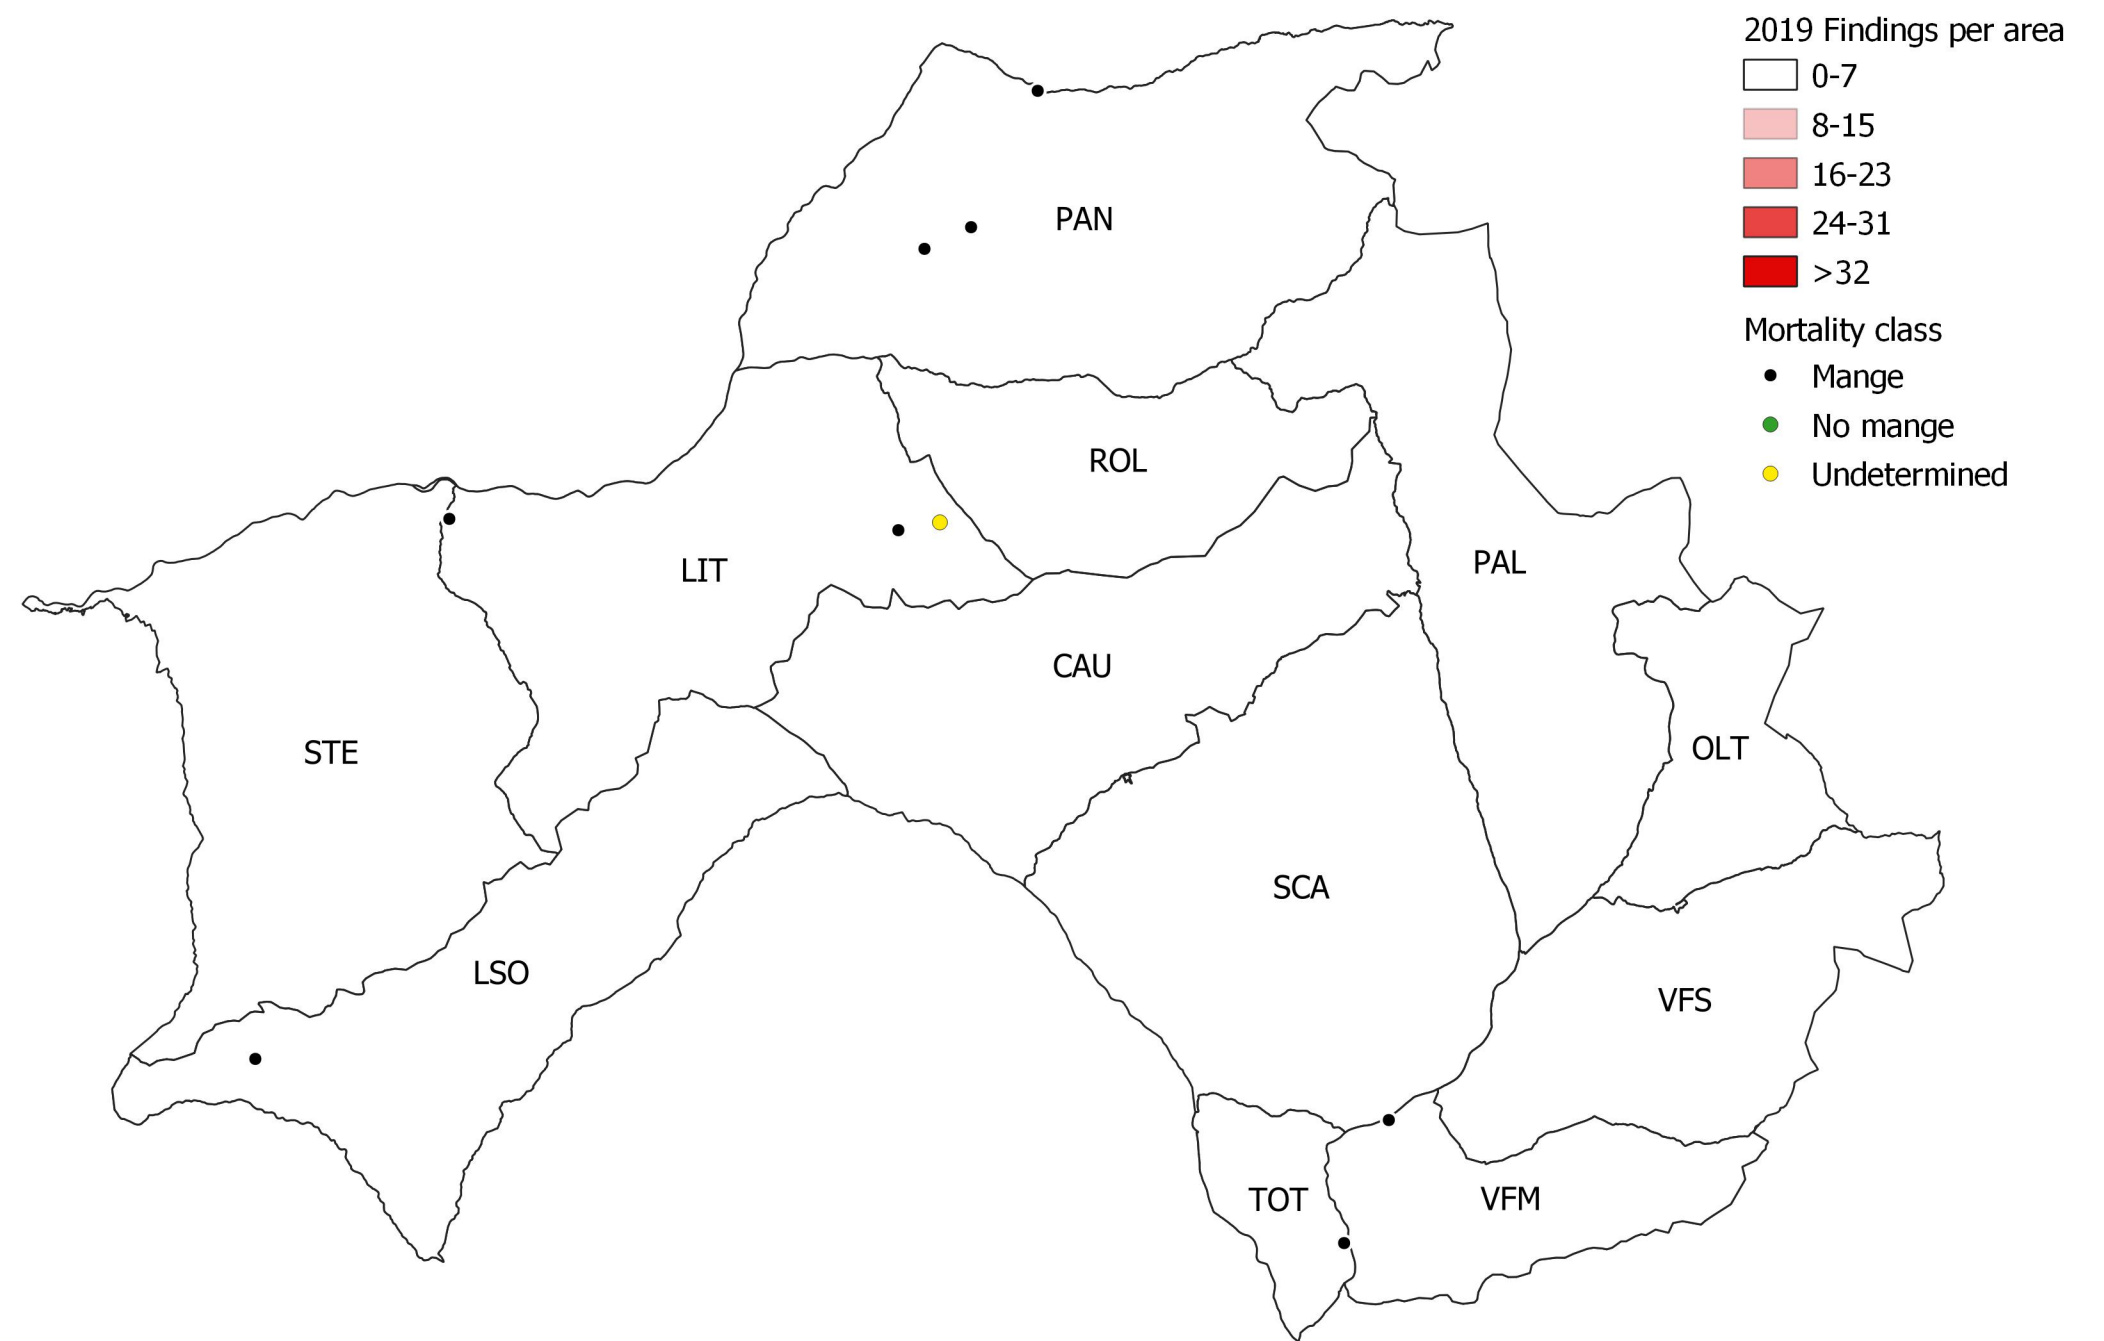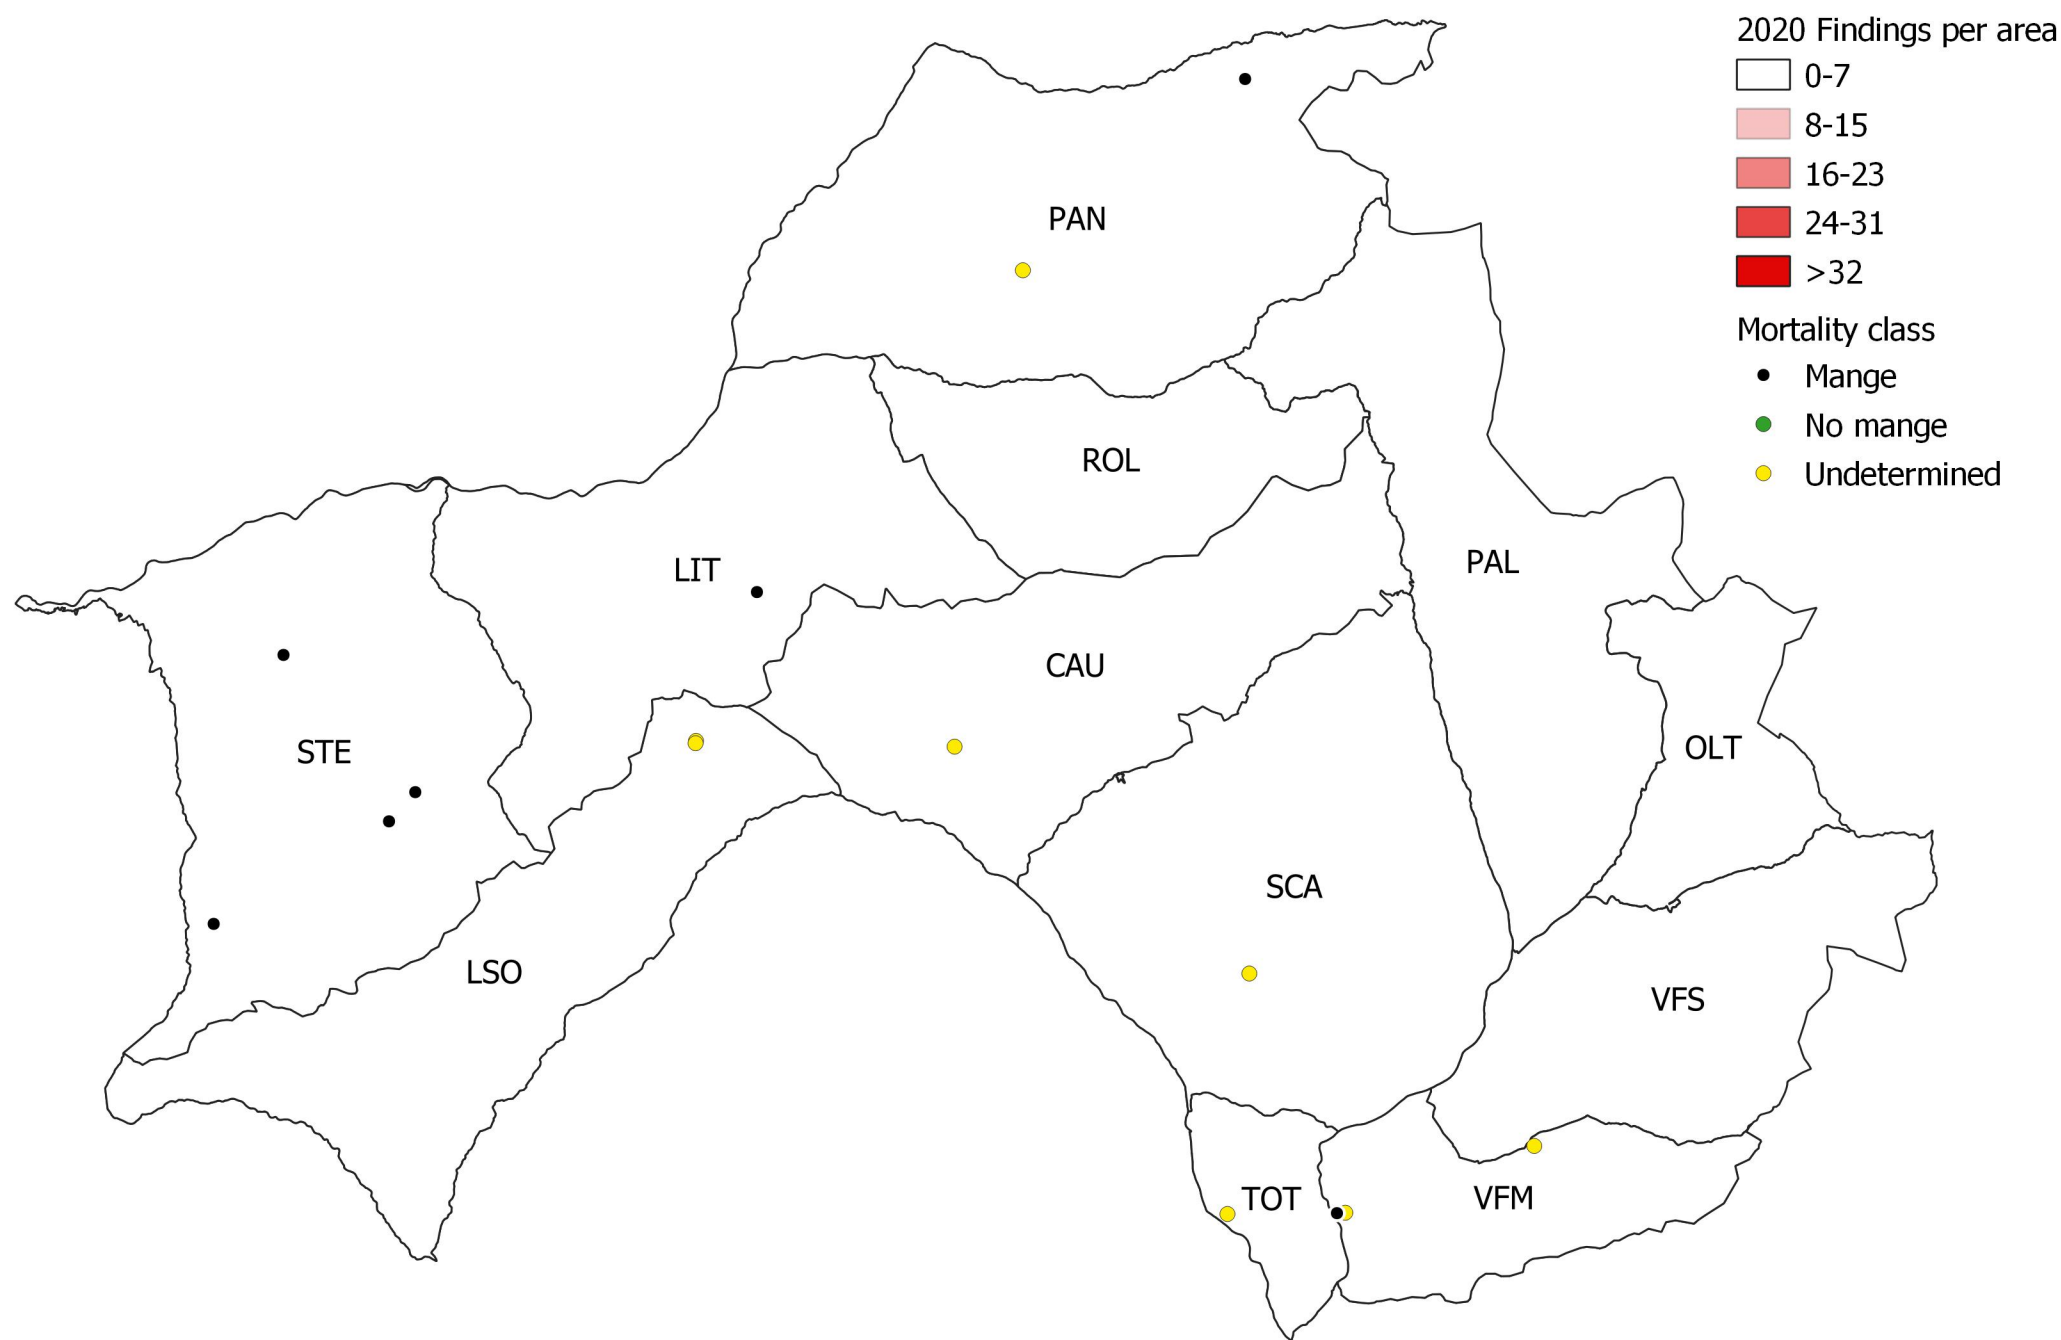

Supplement: s1 [file s1]

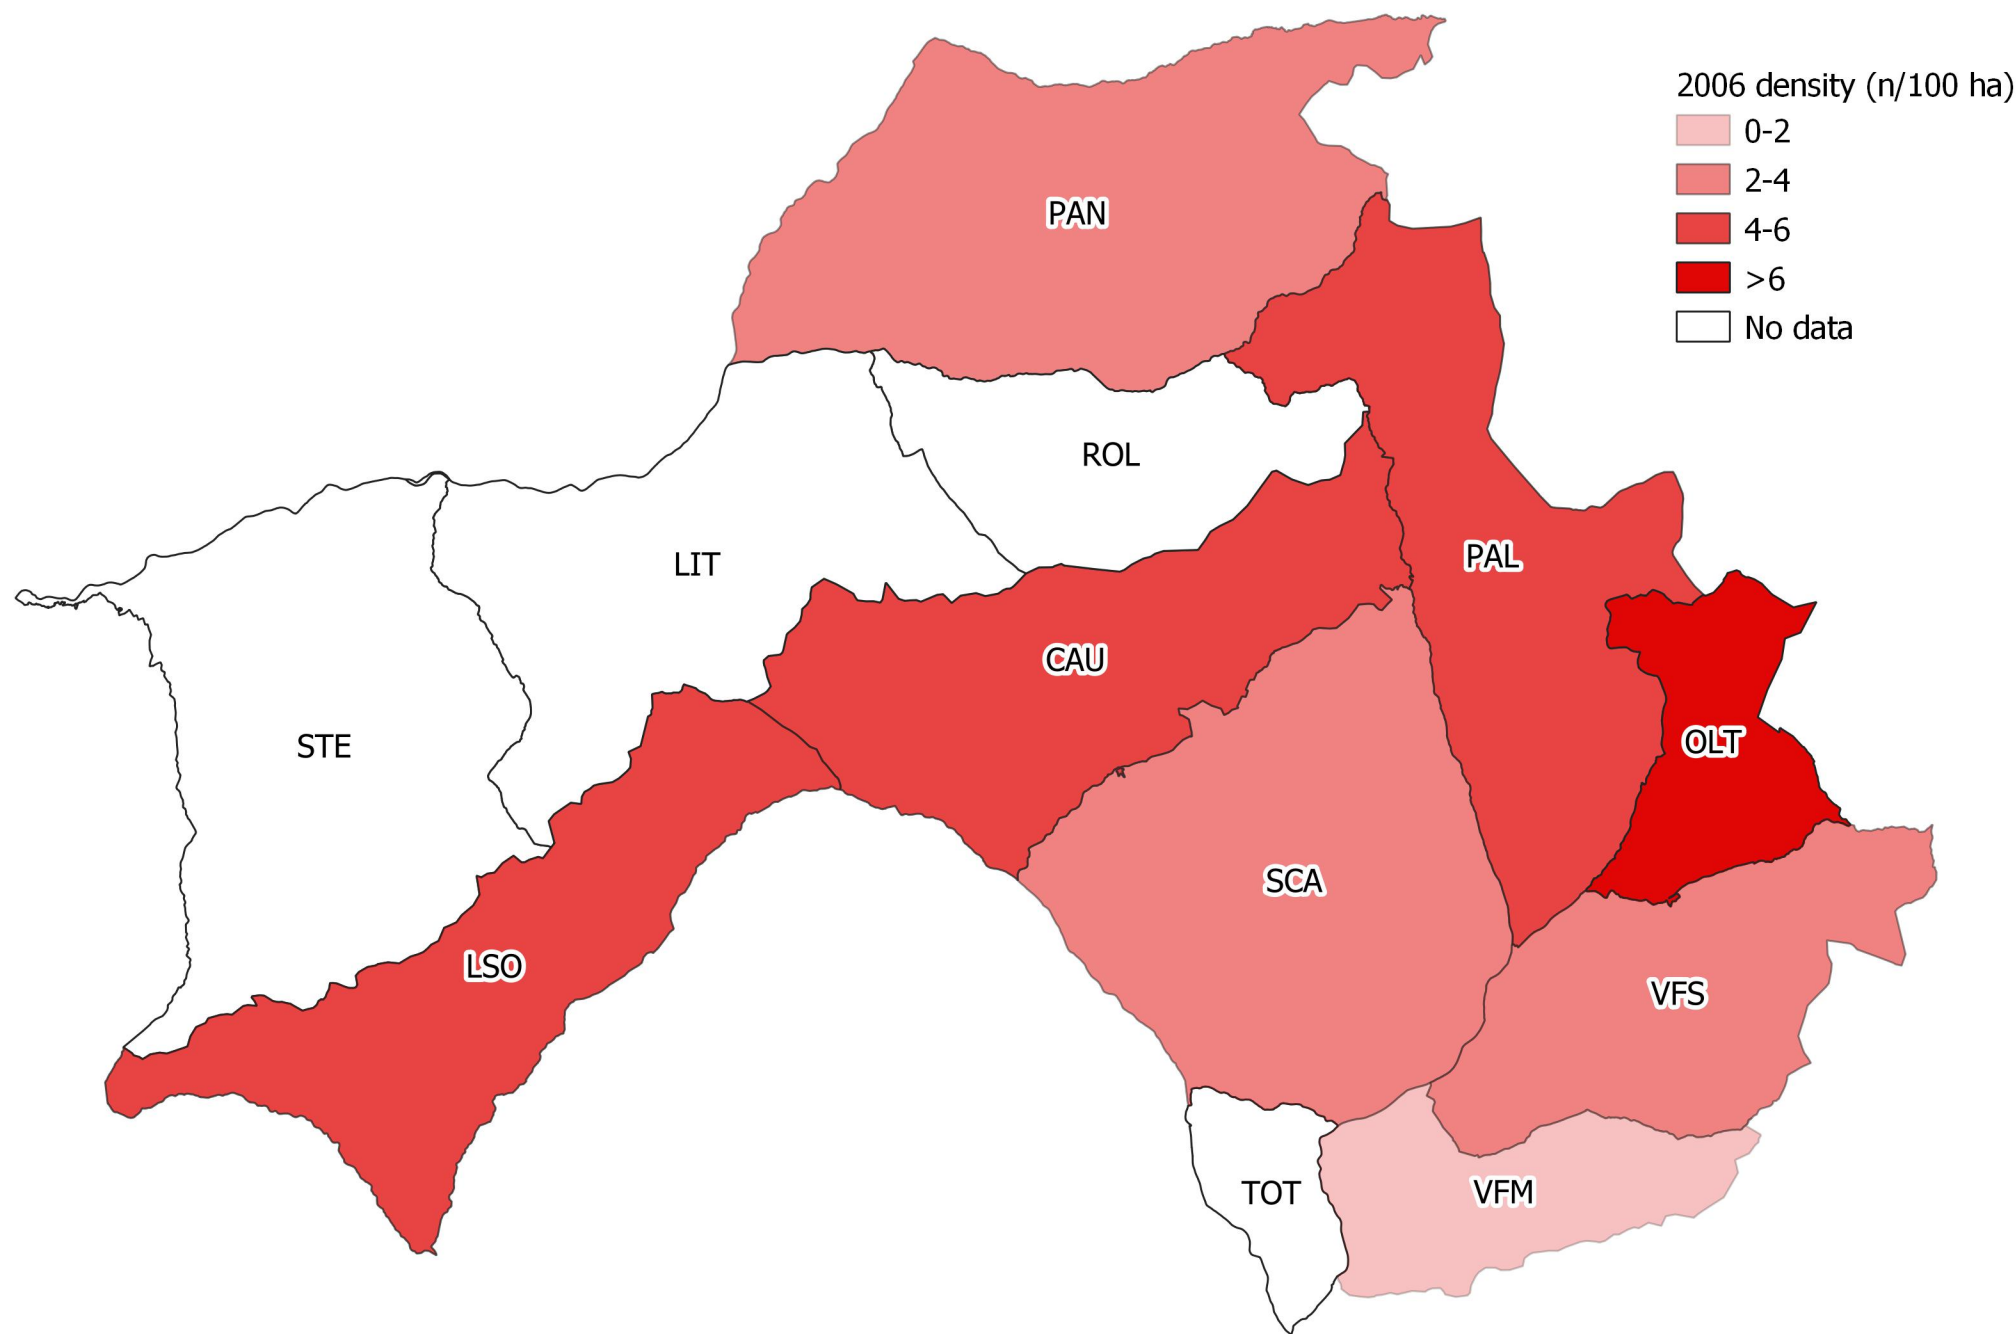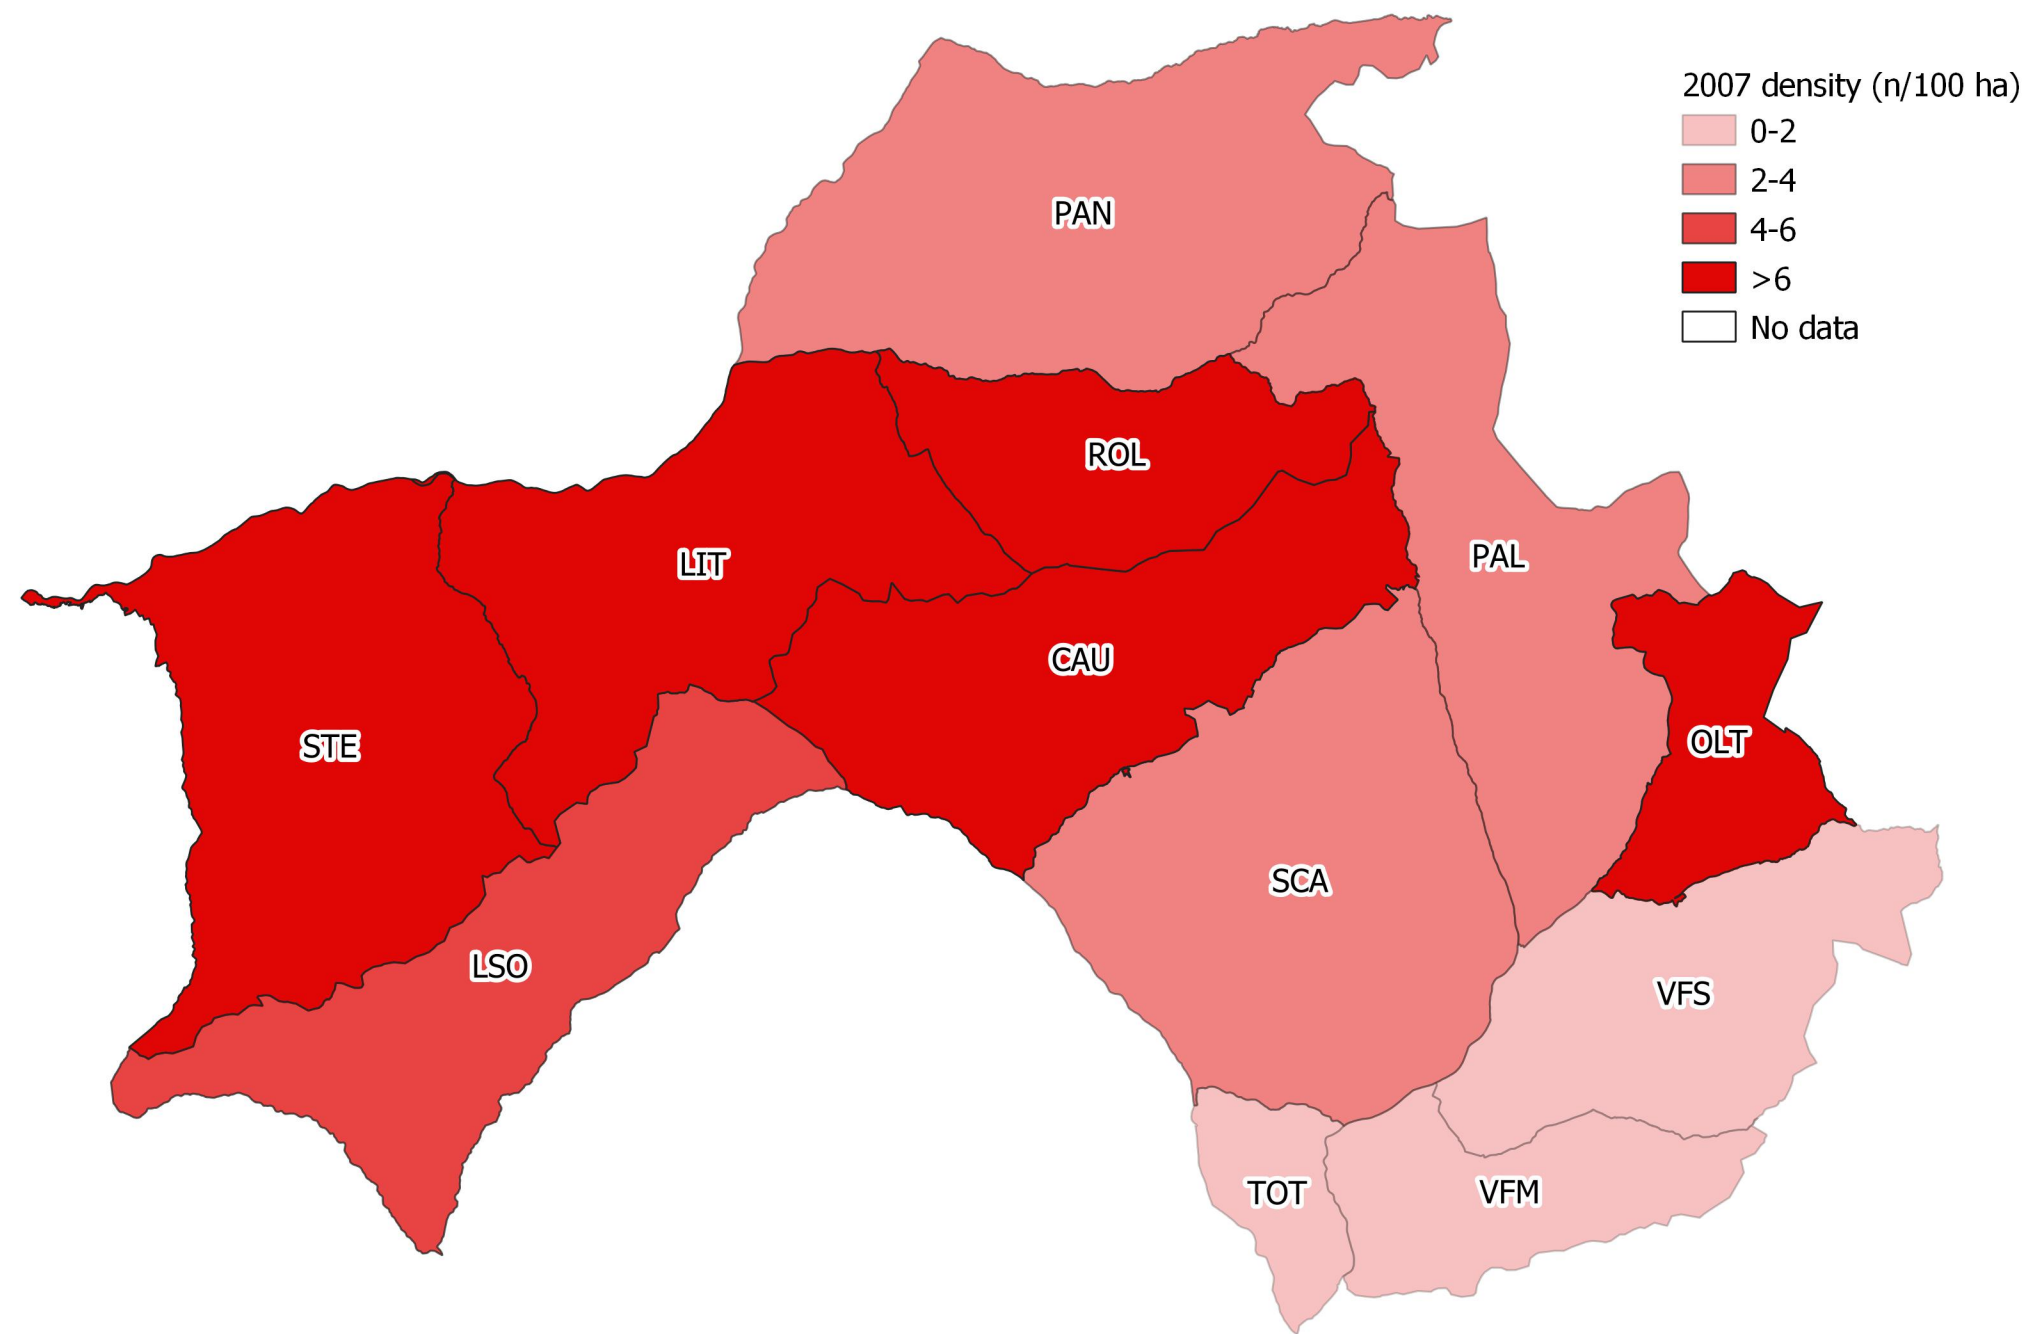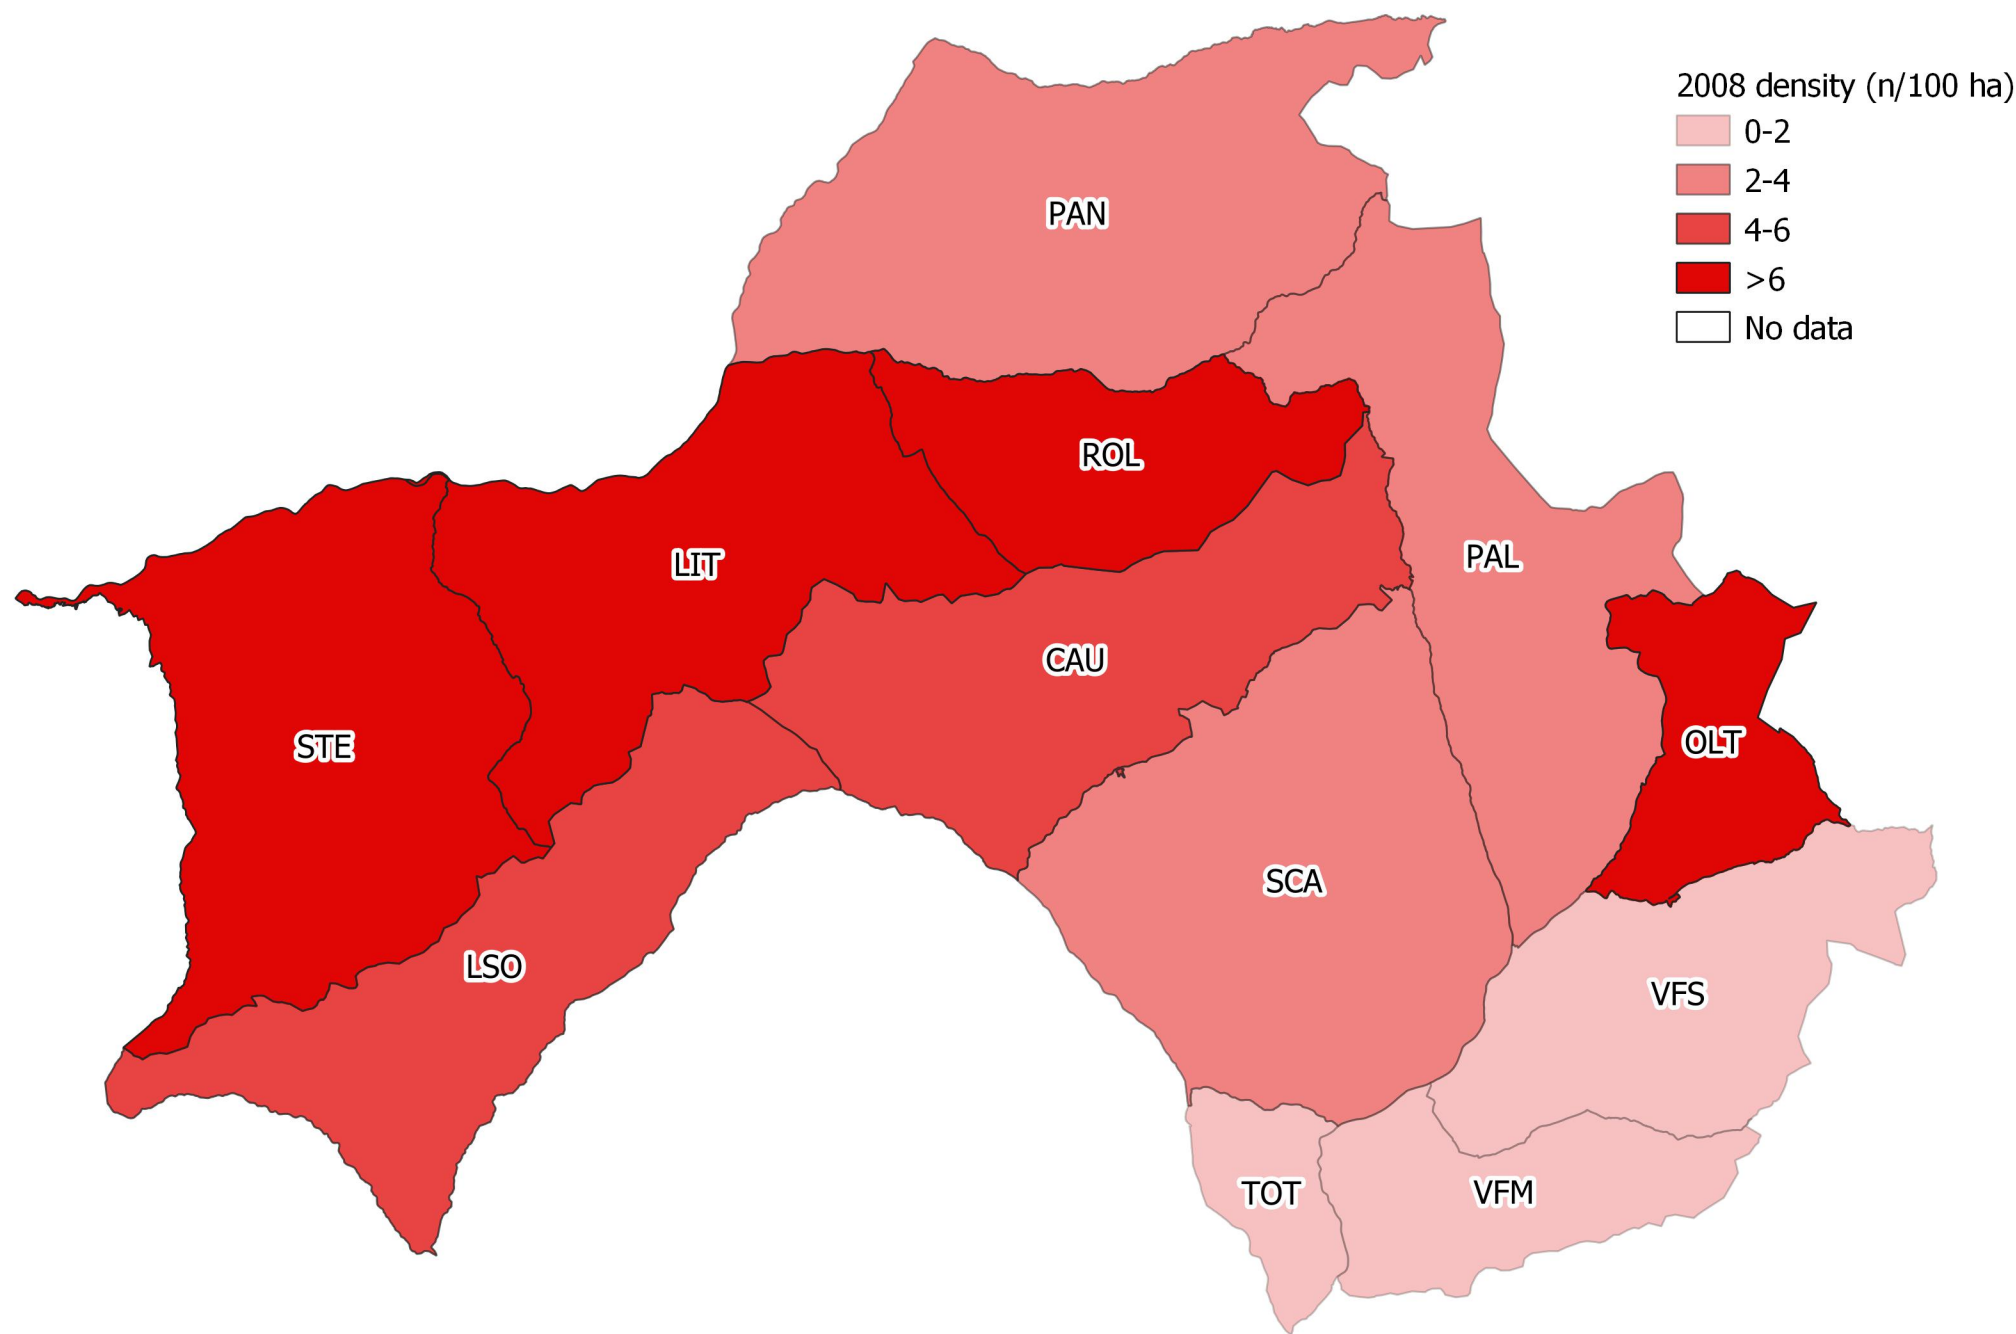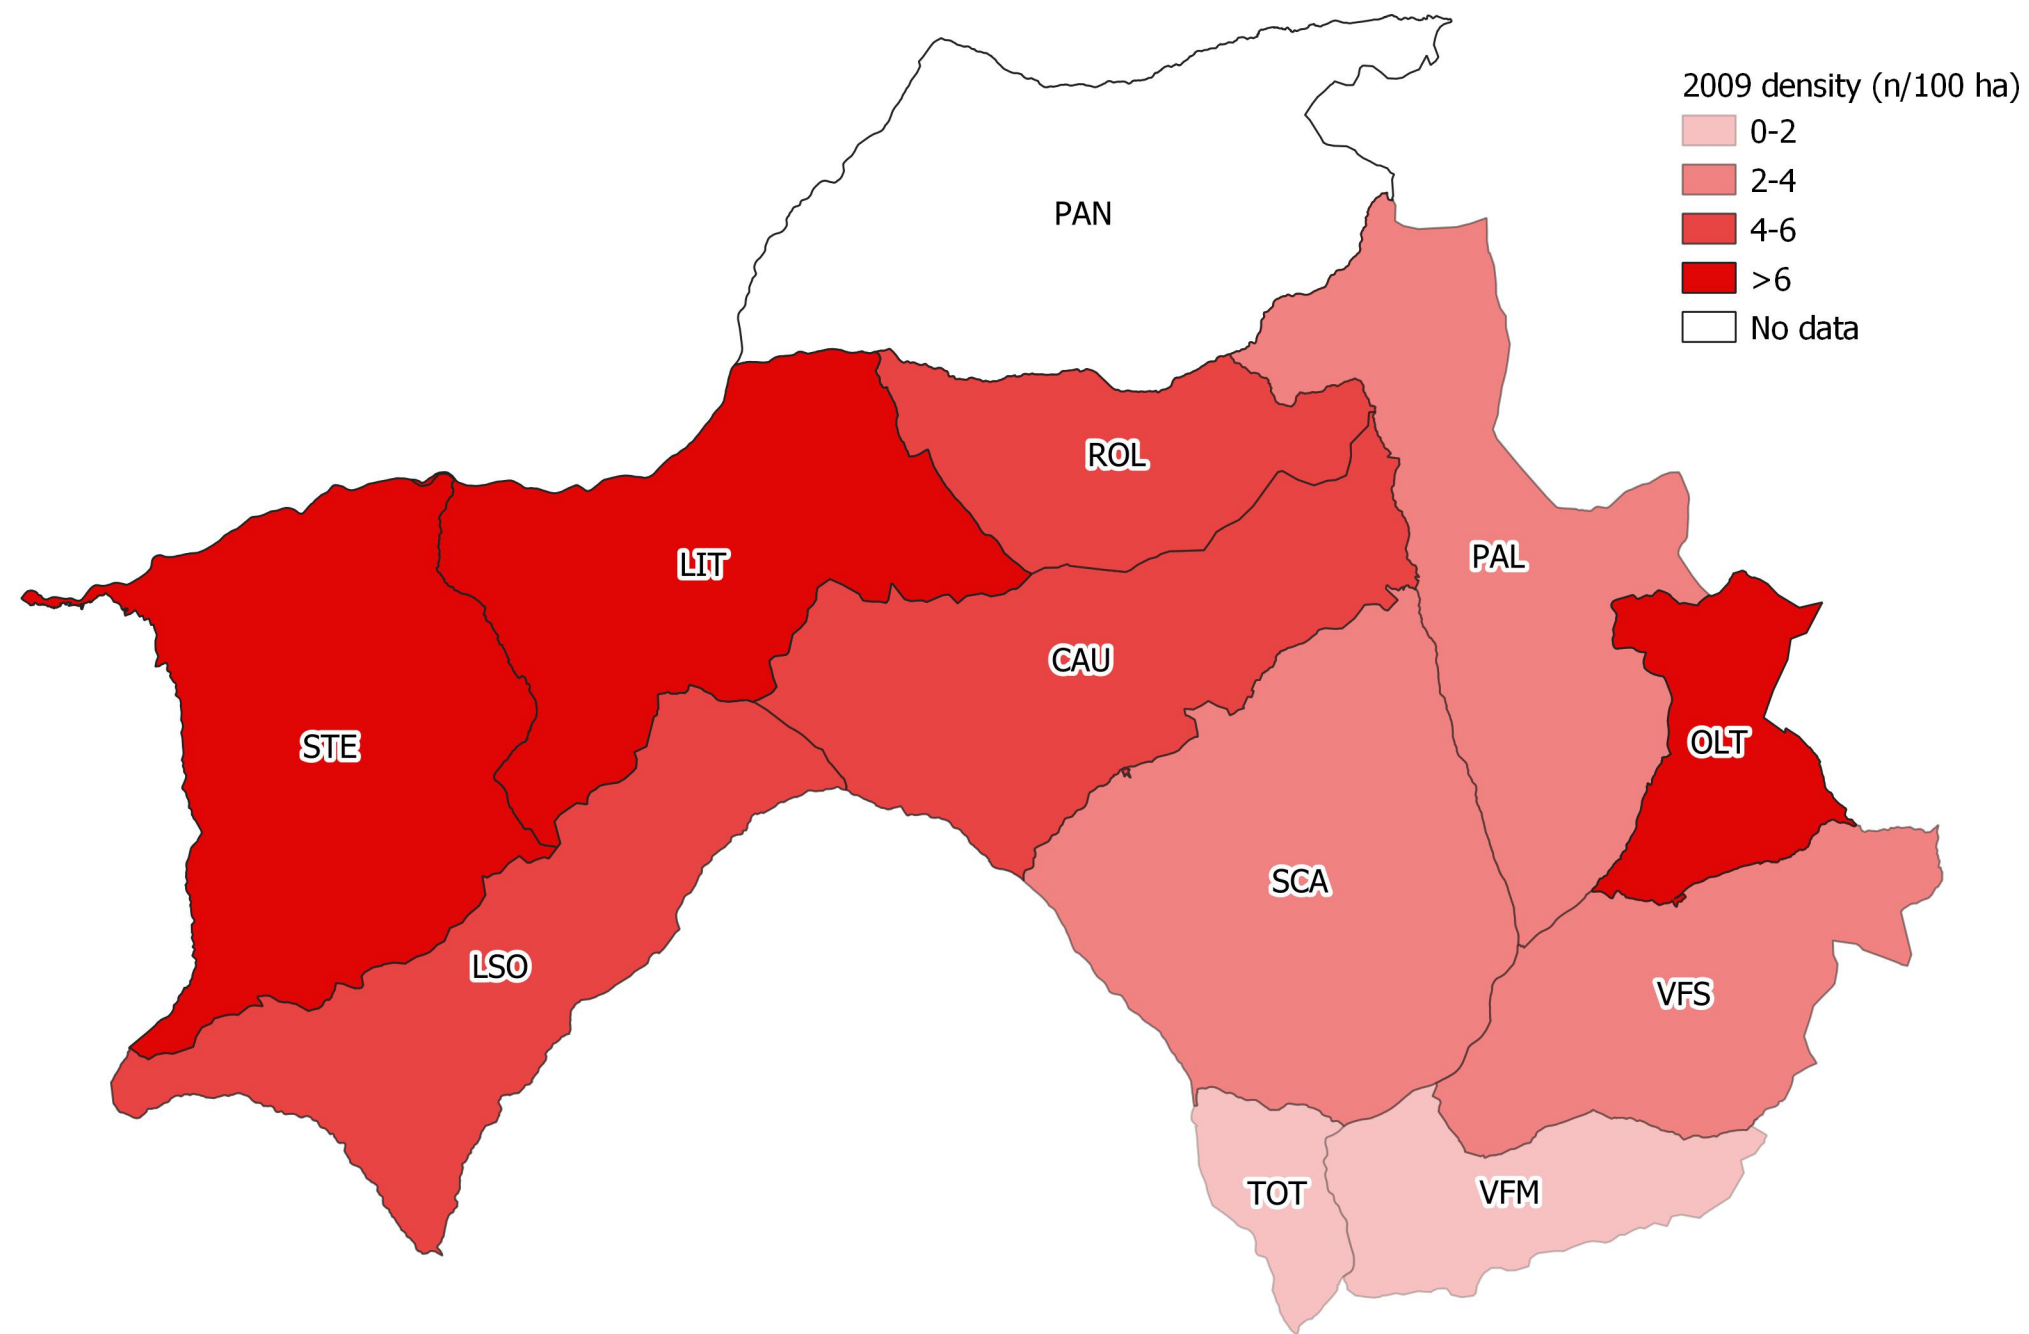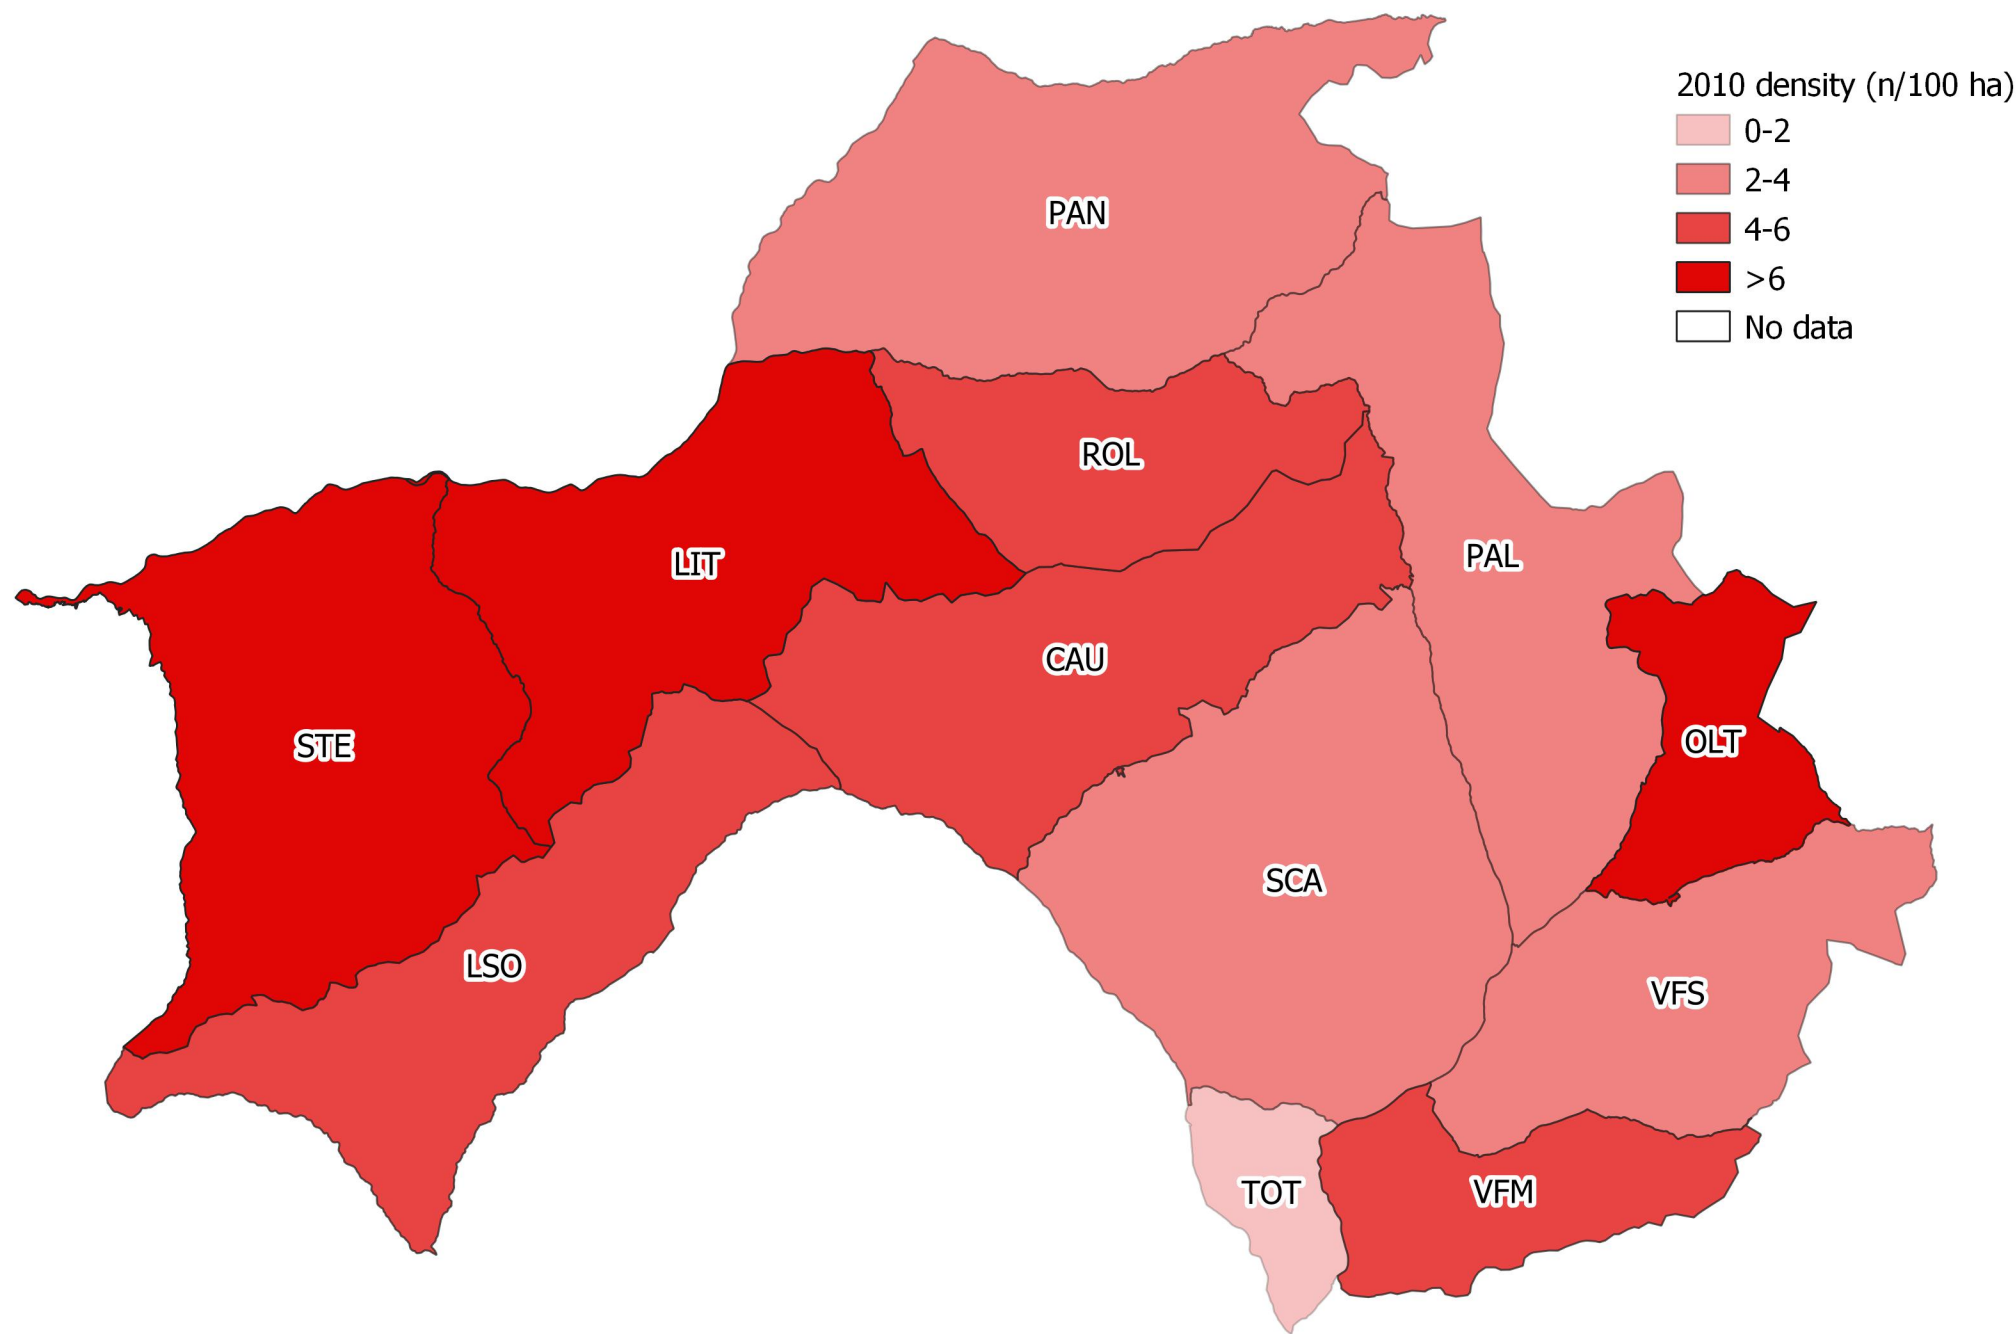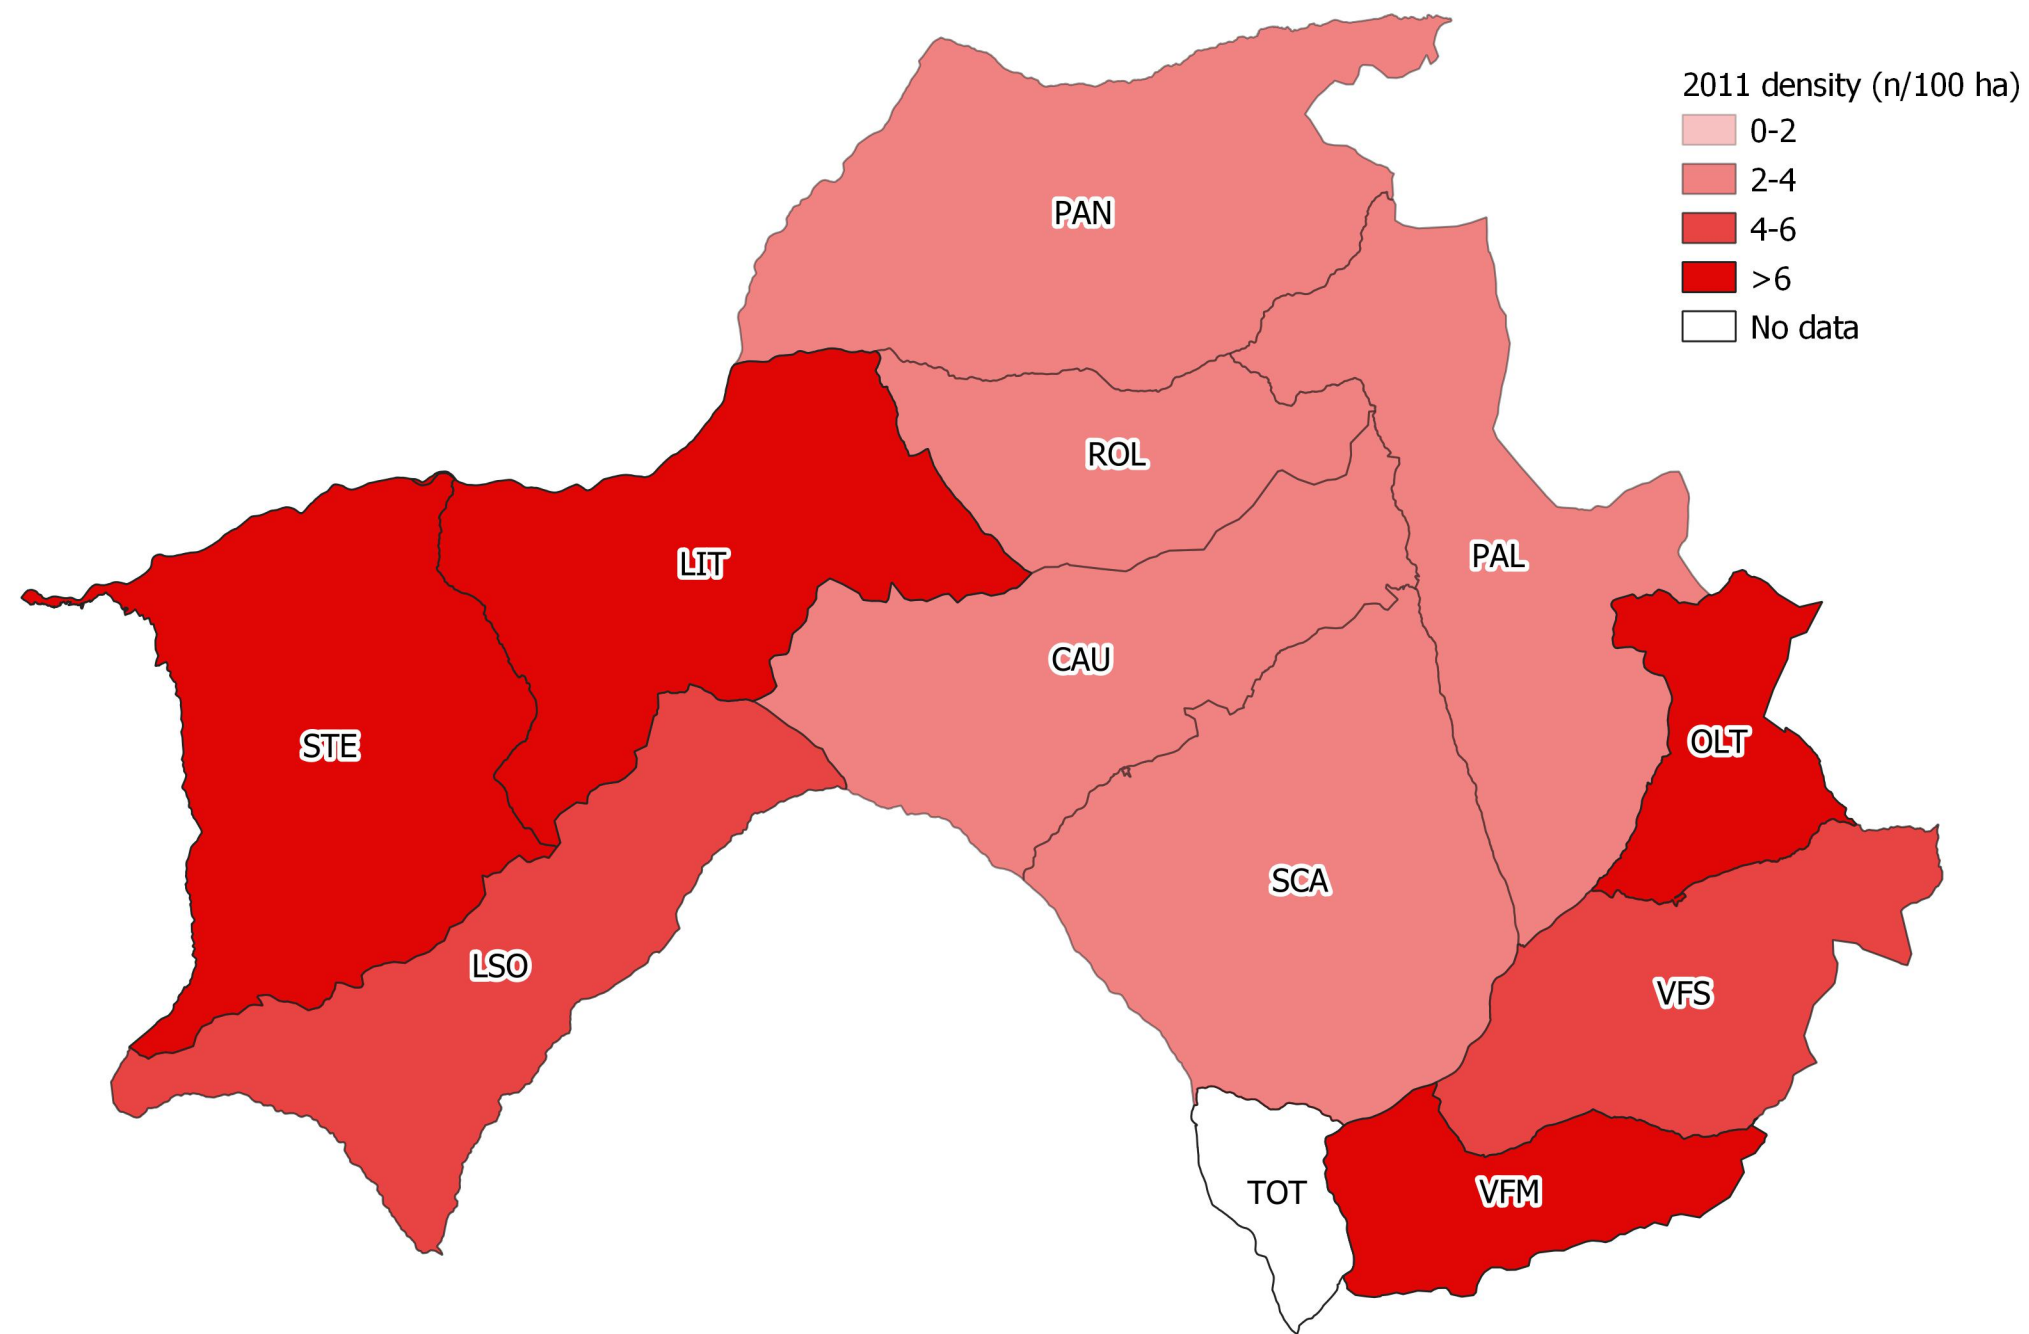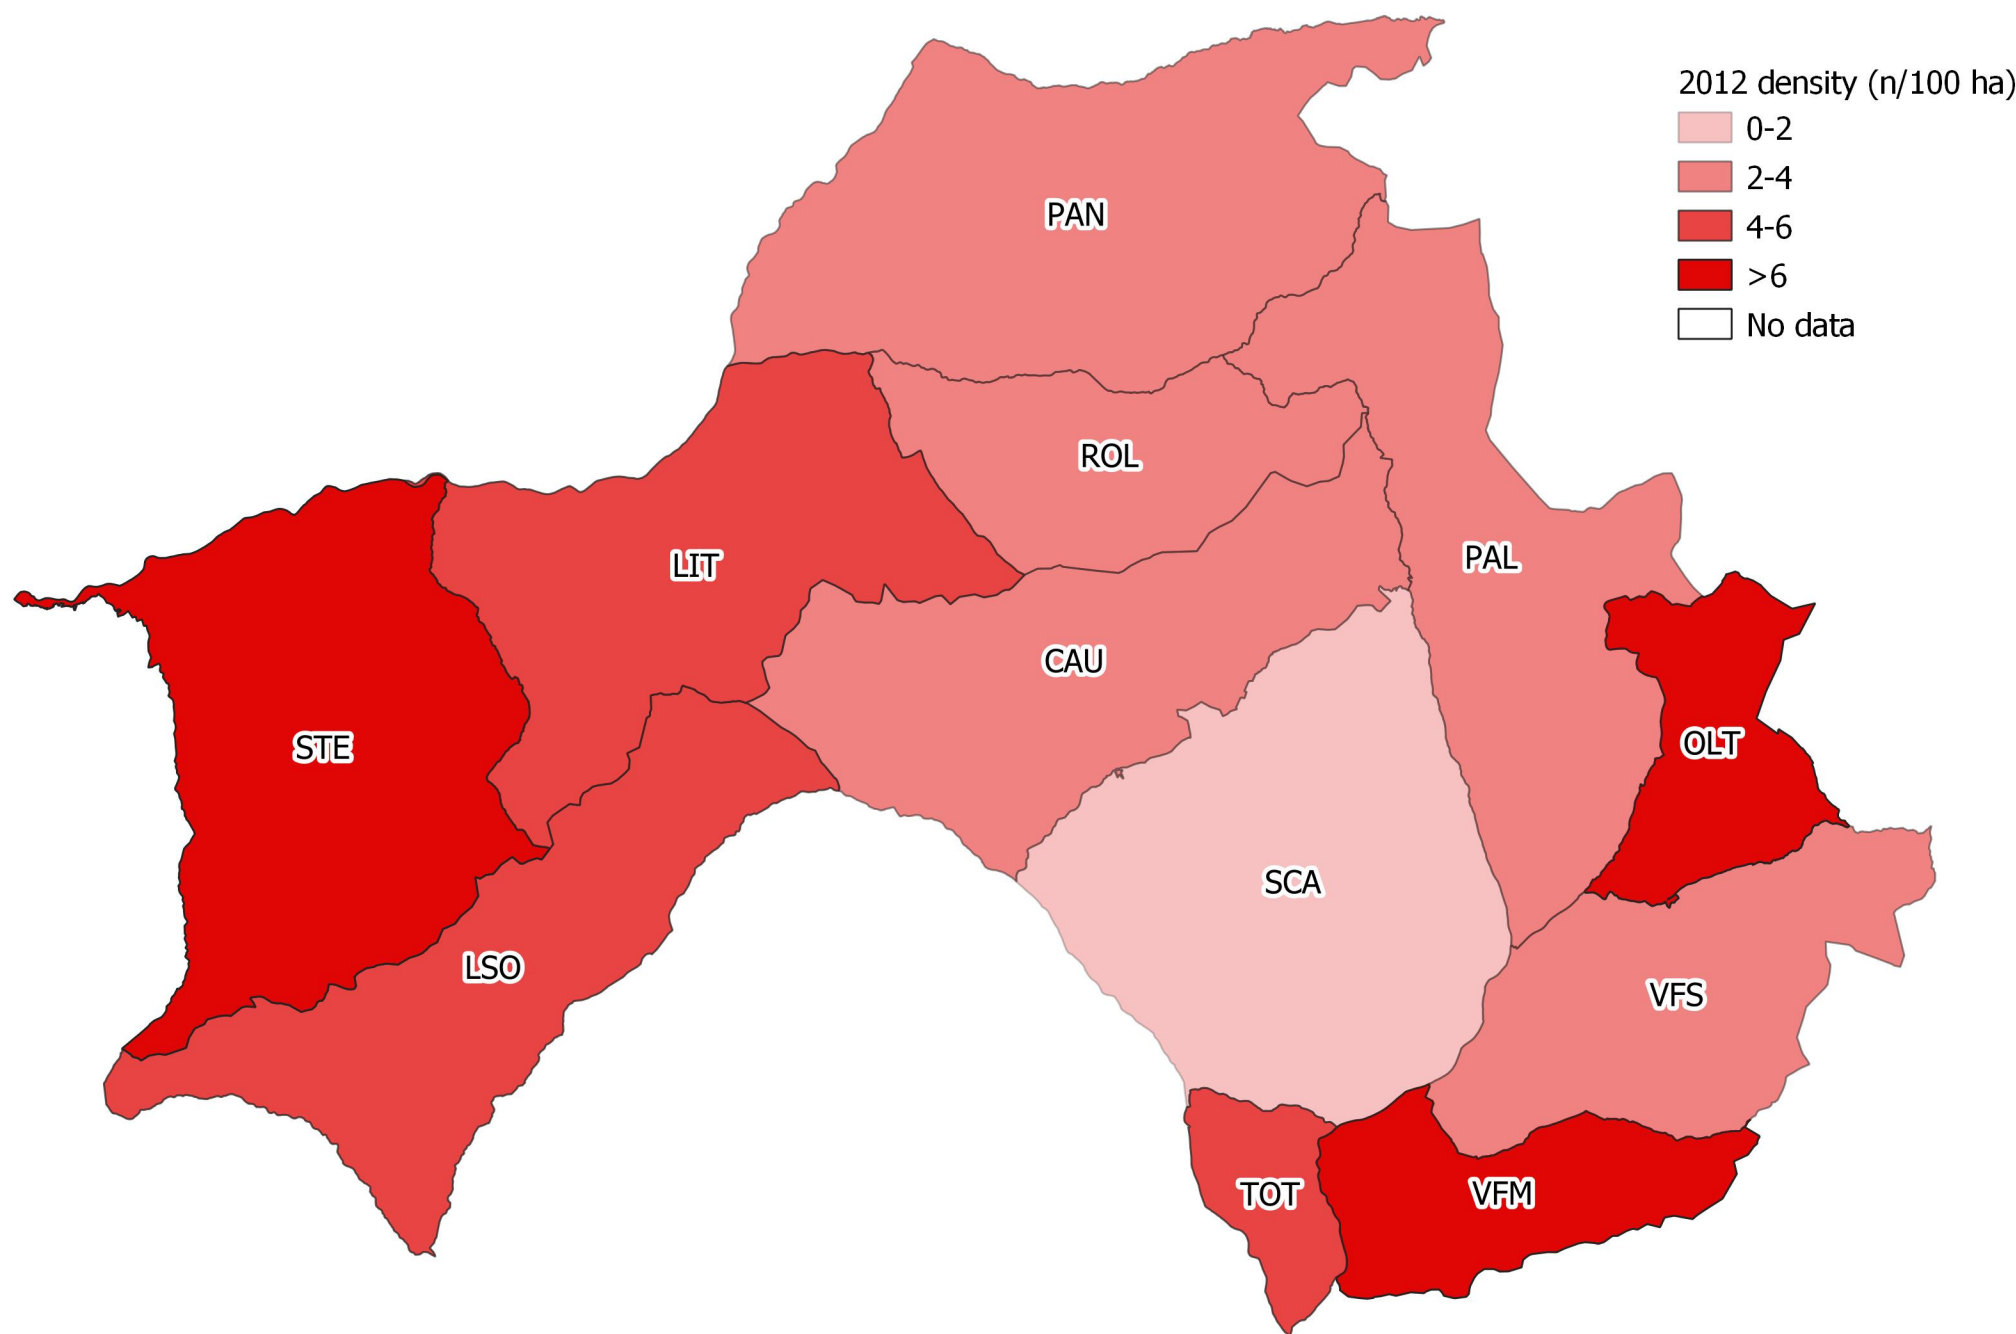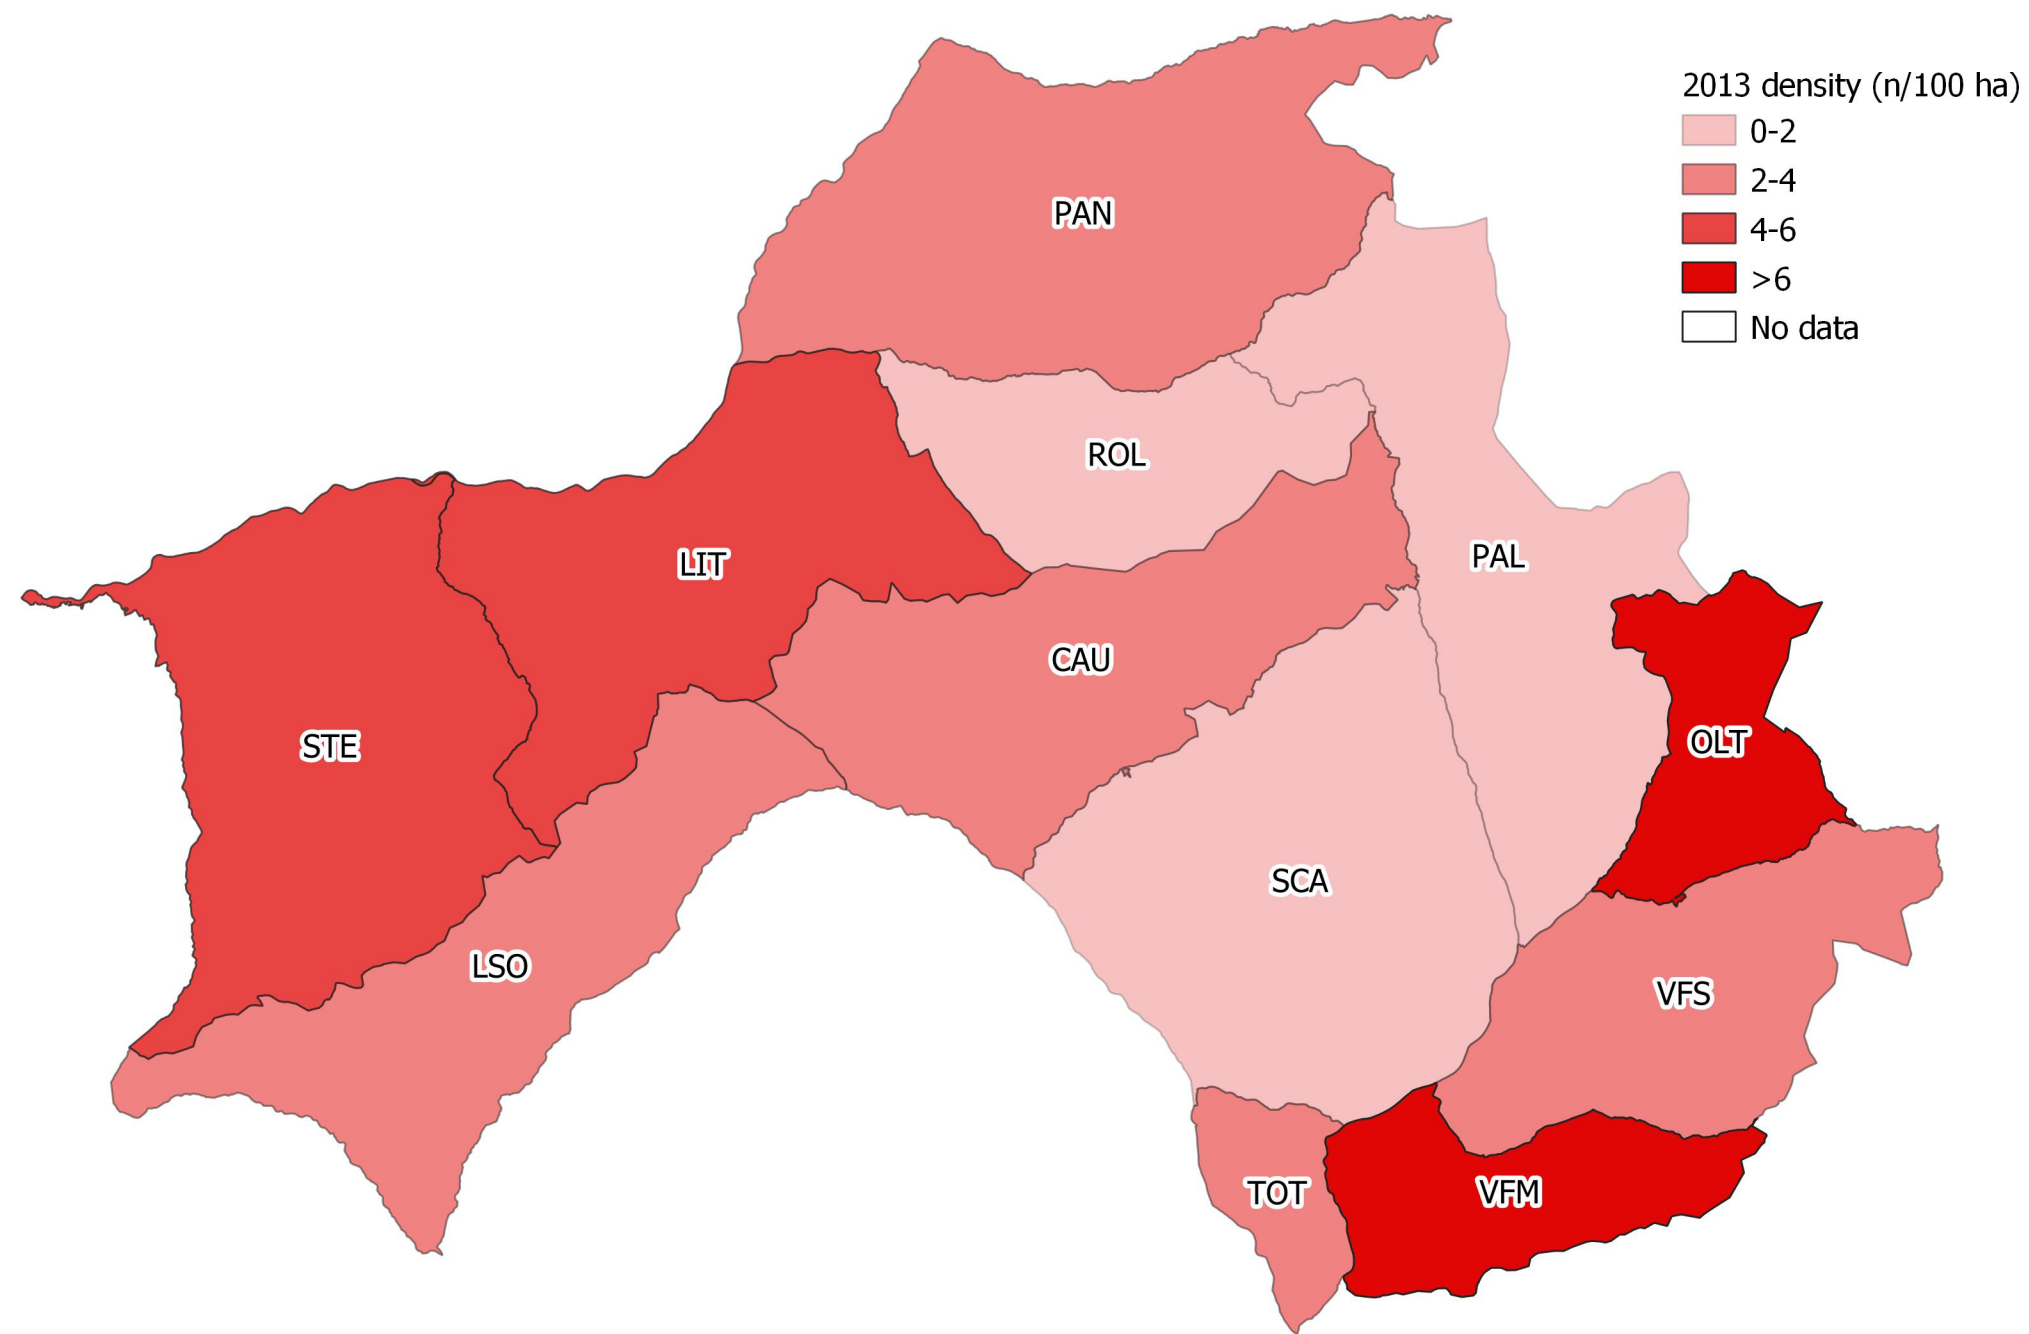



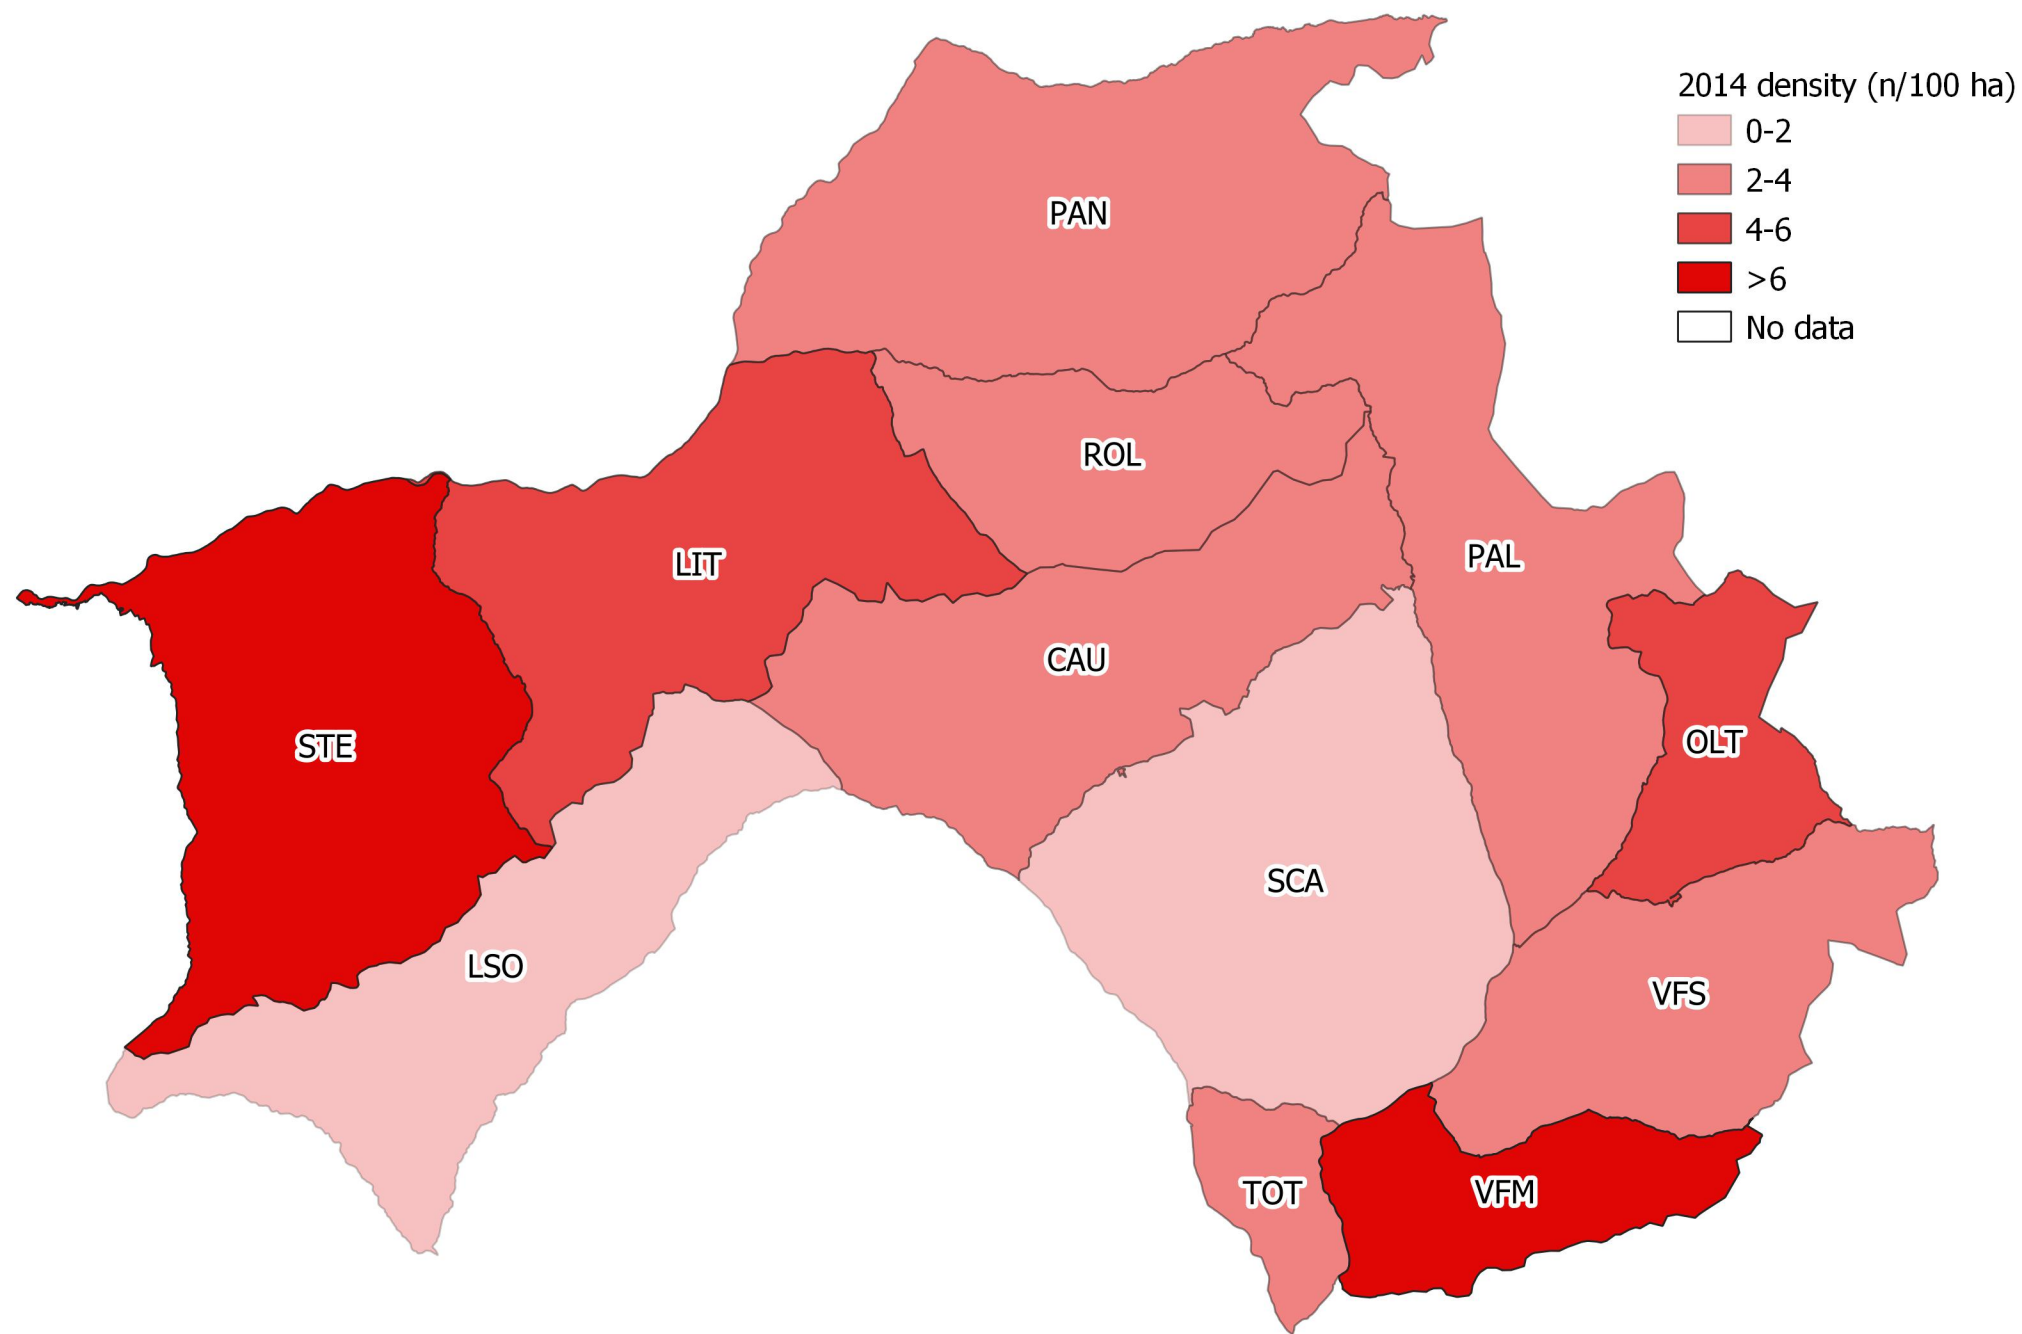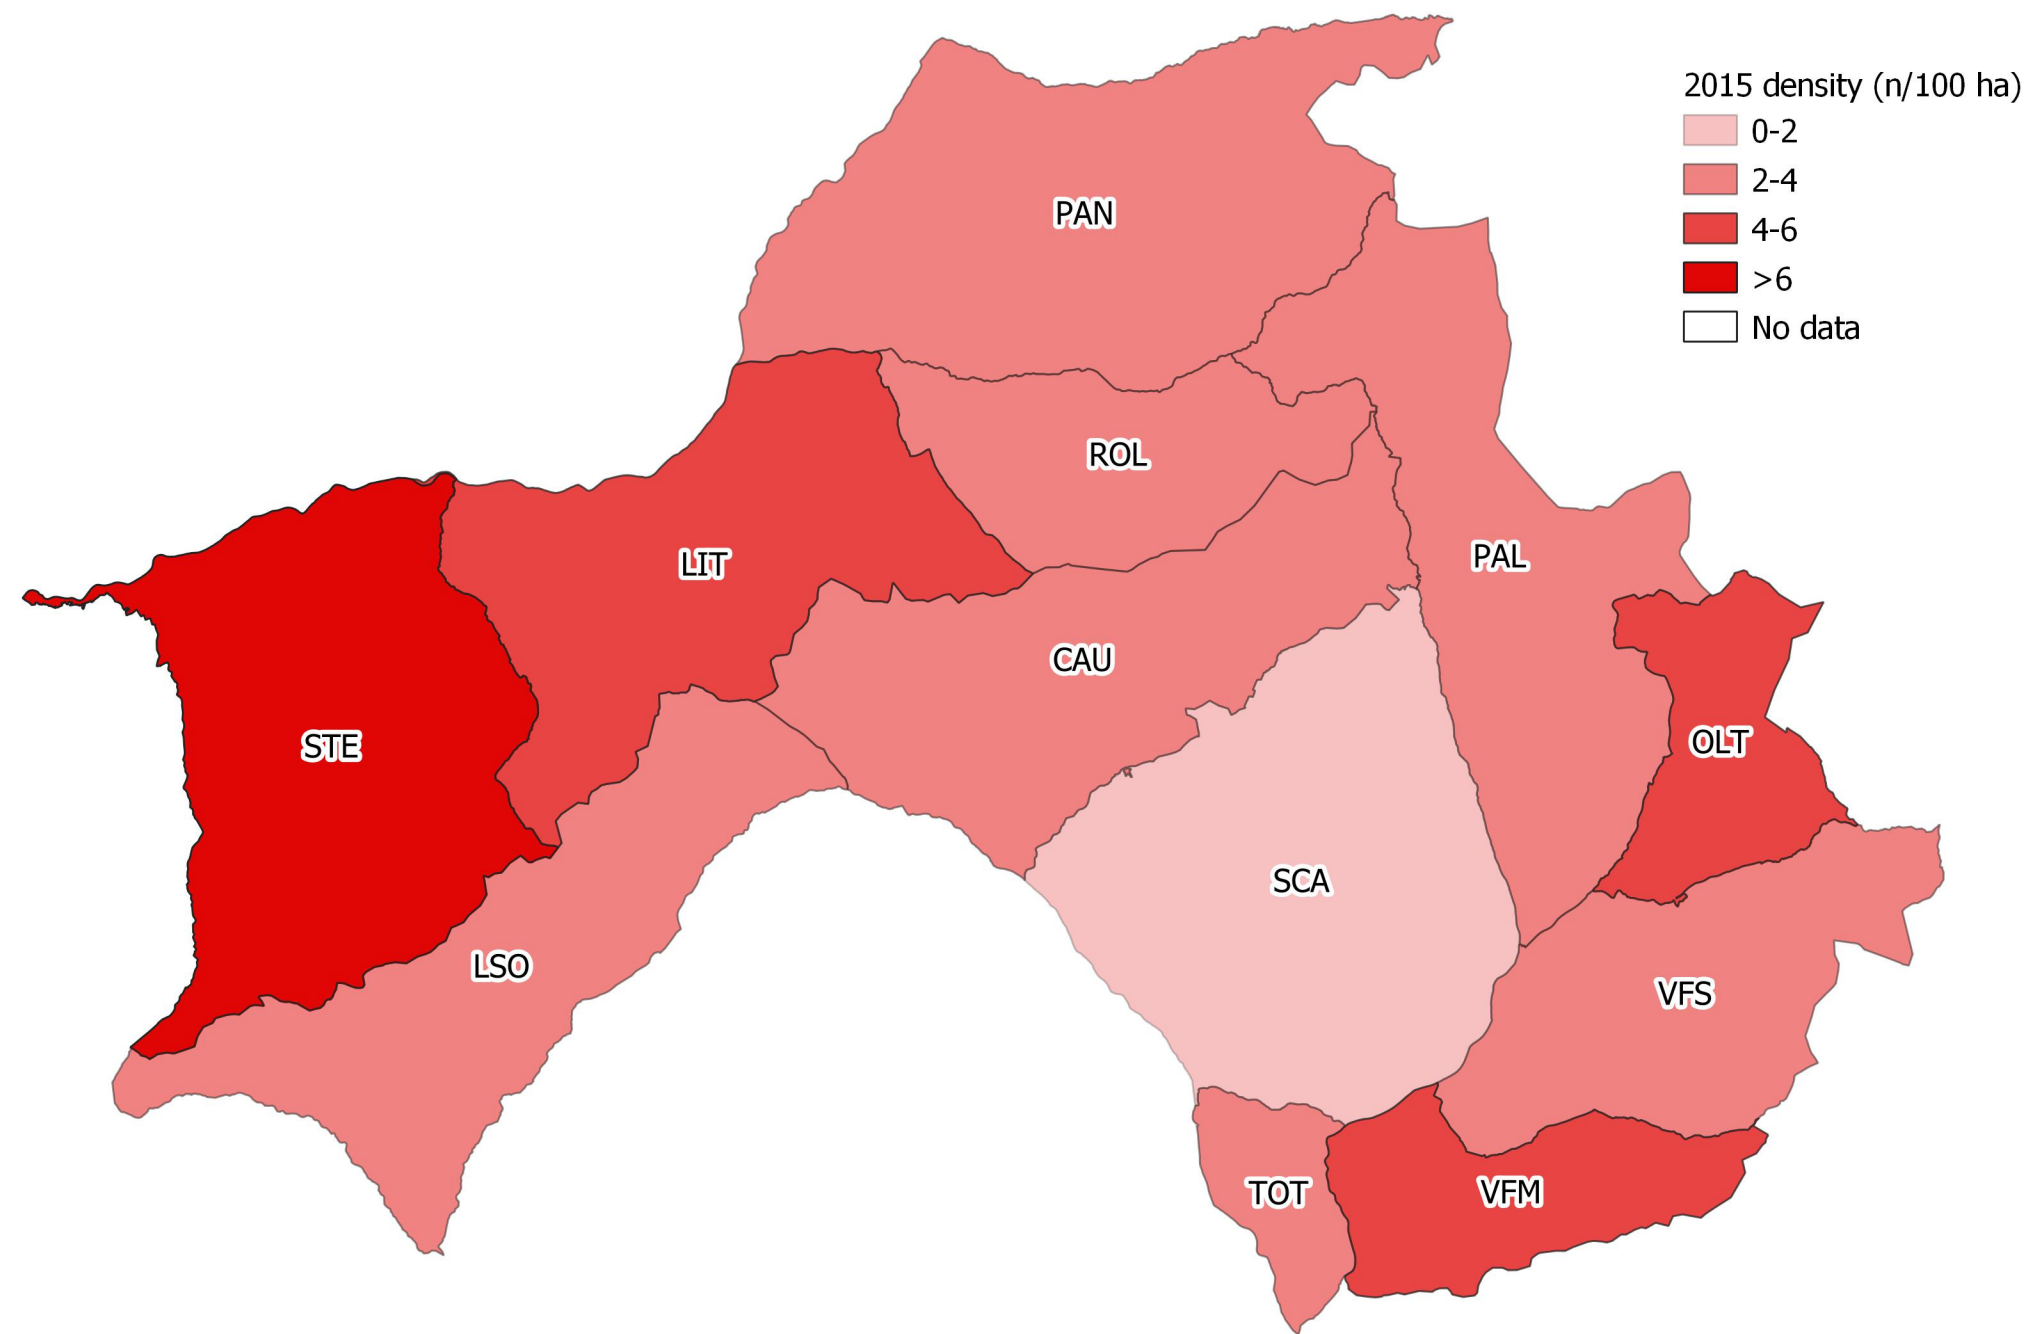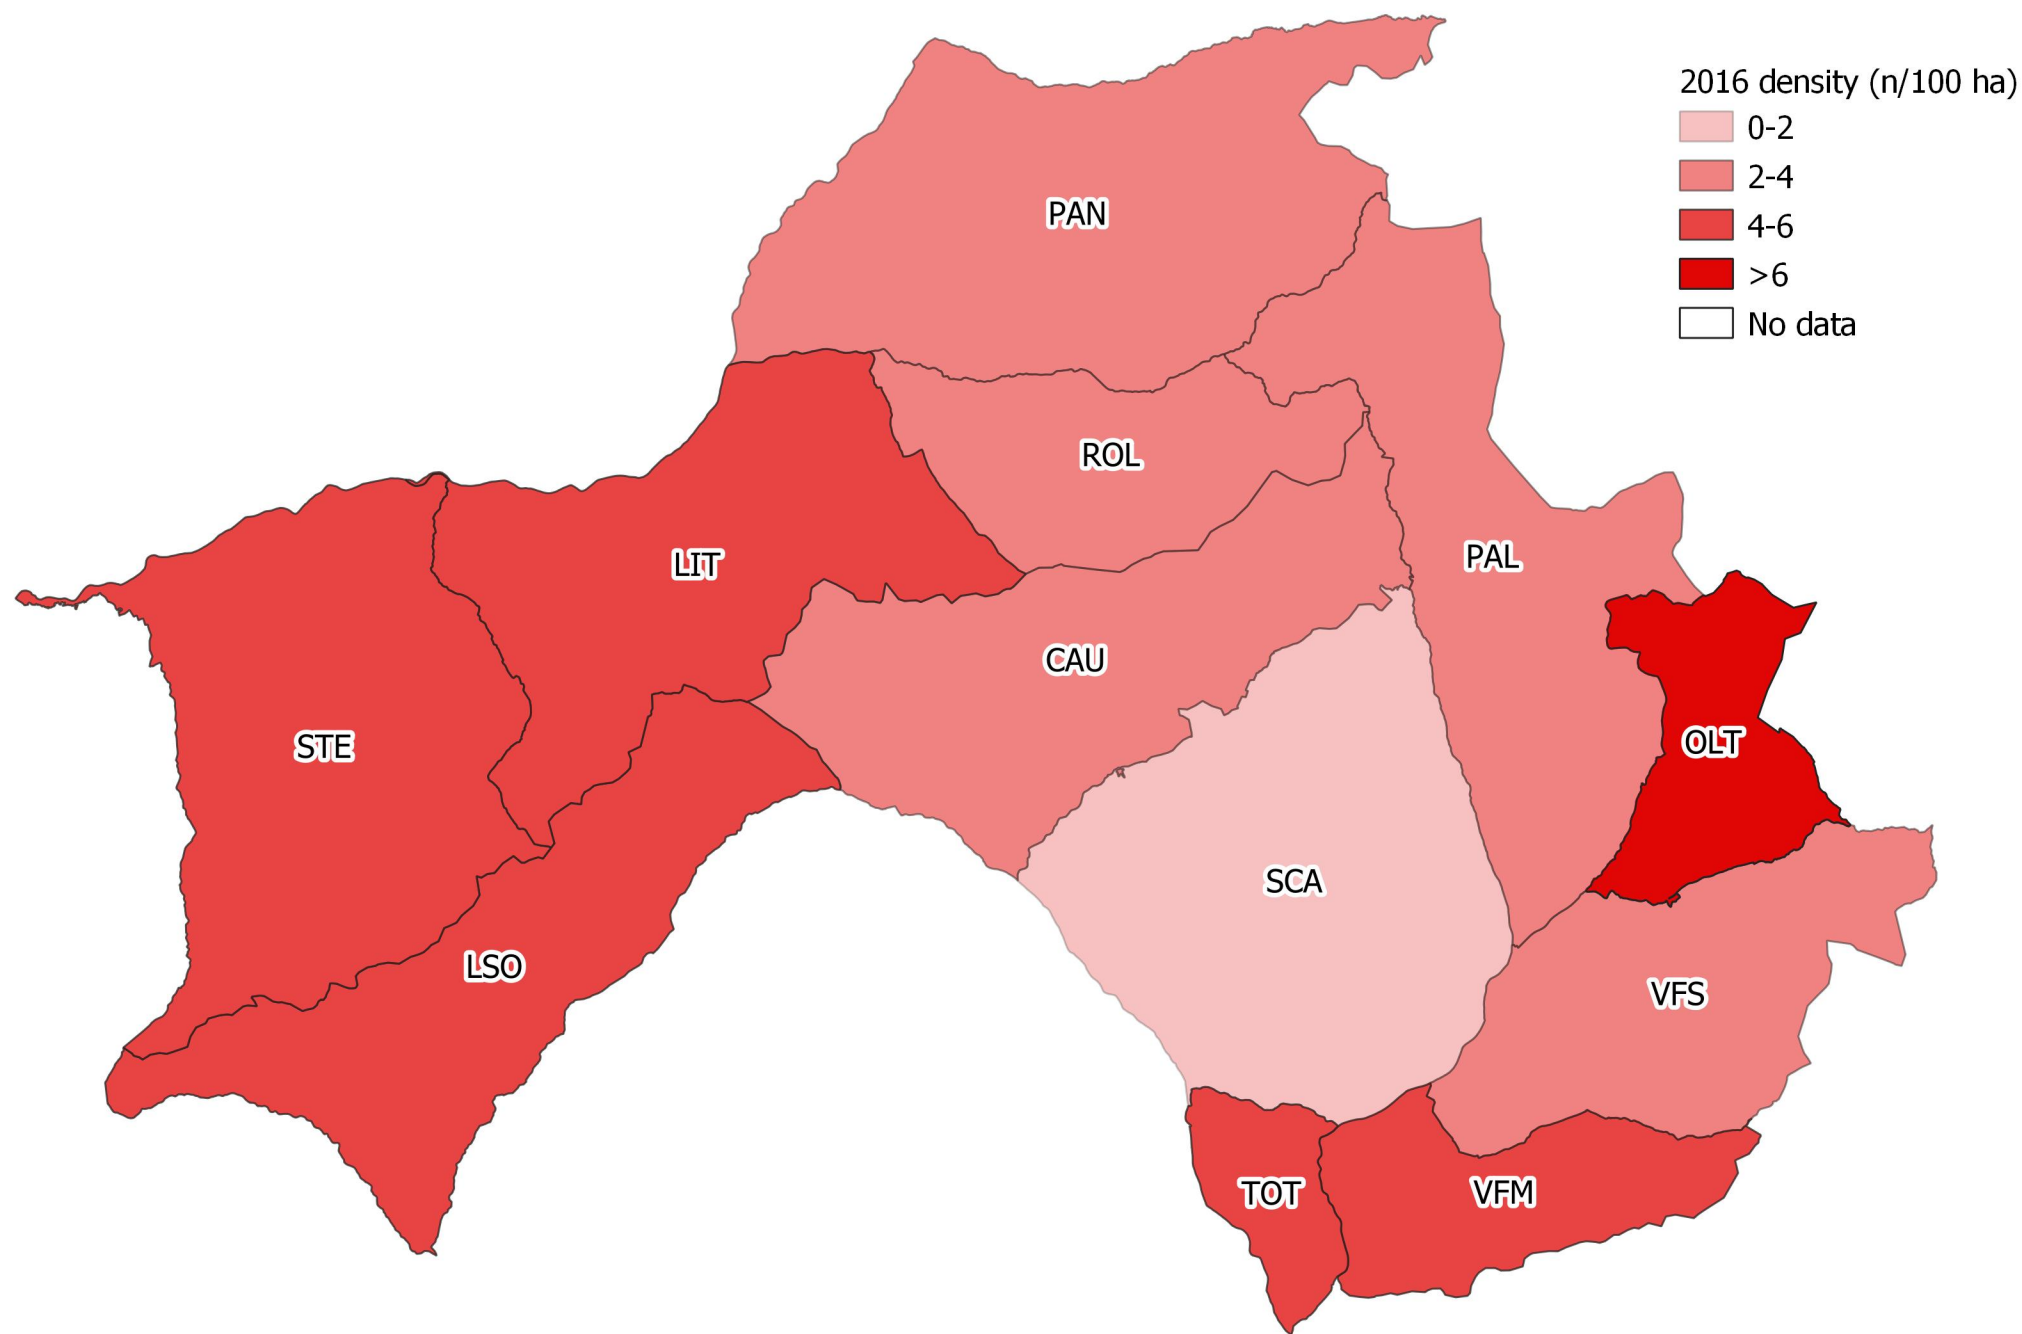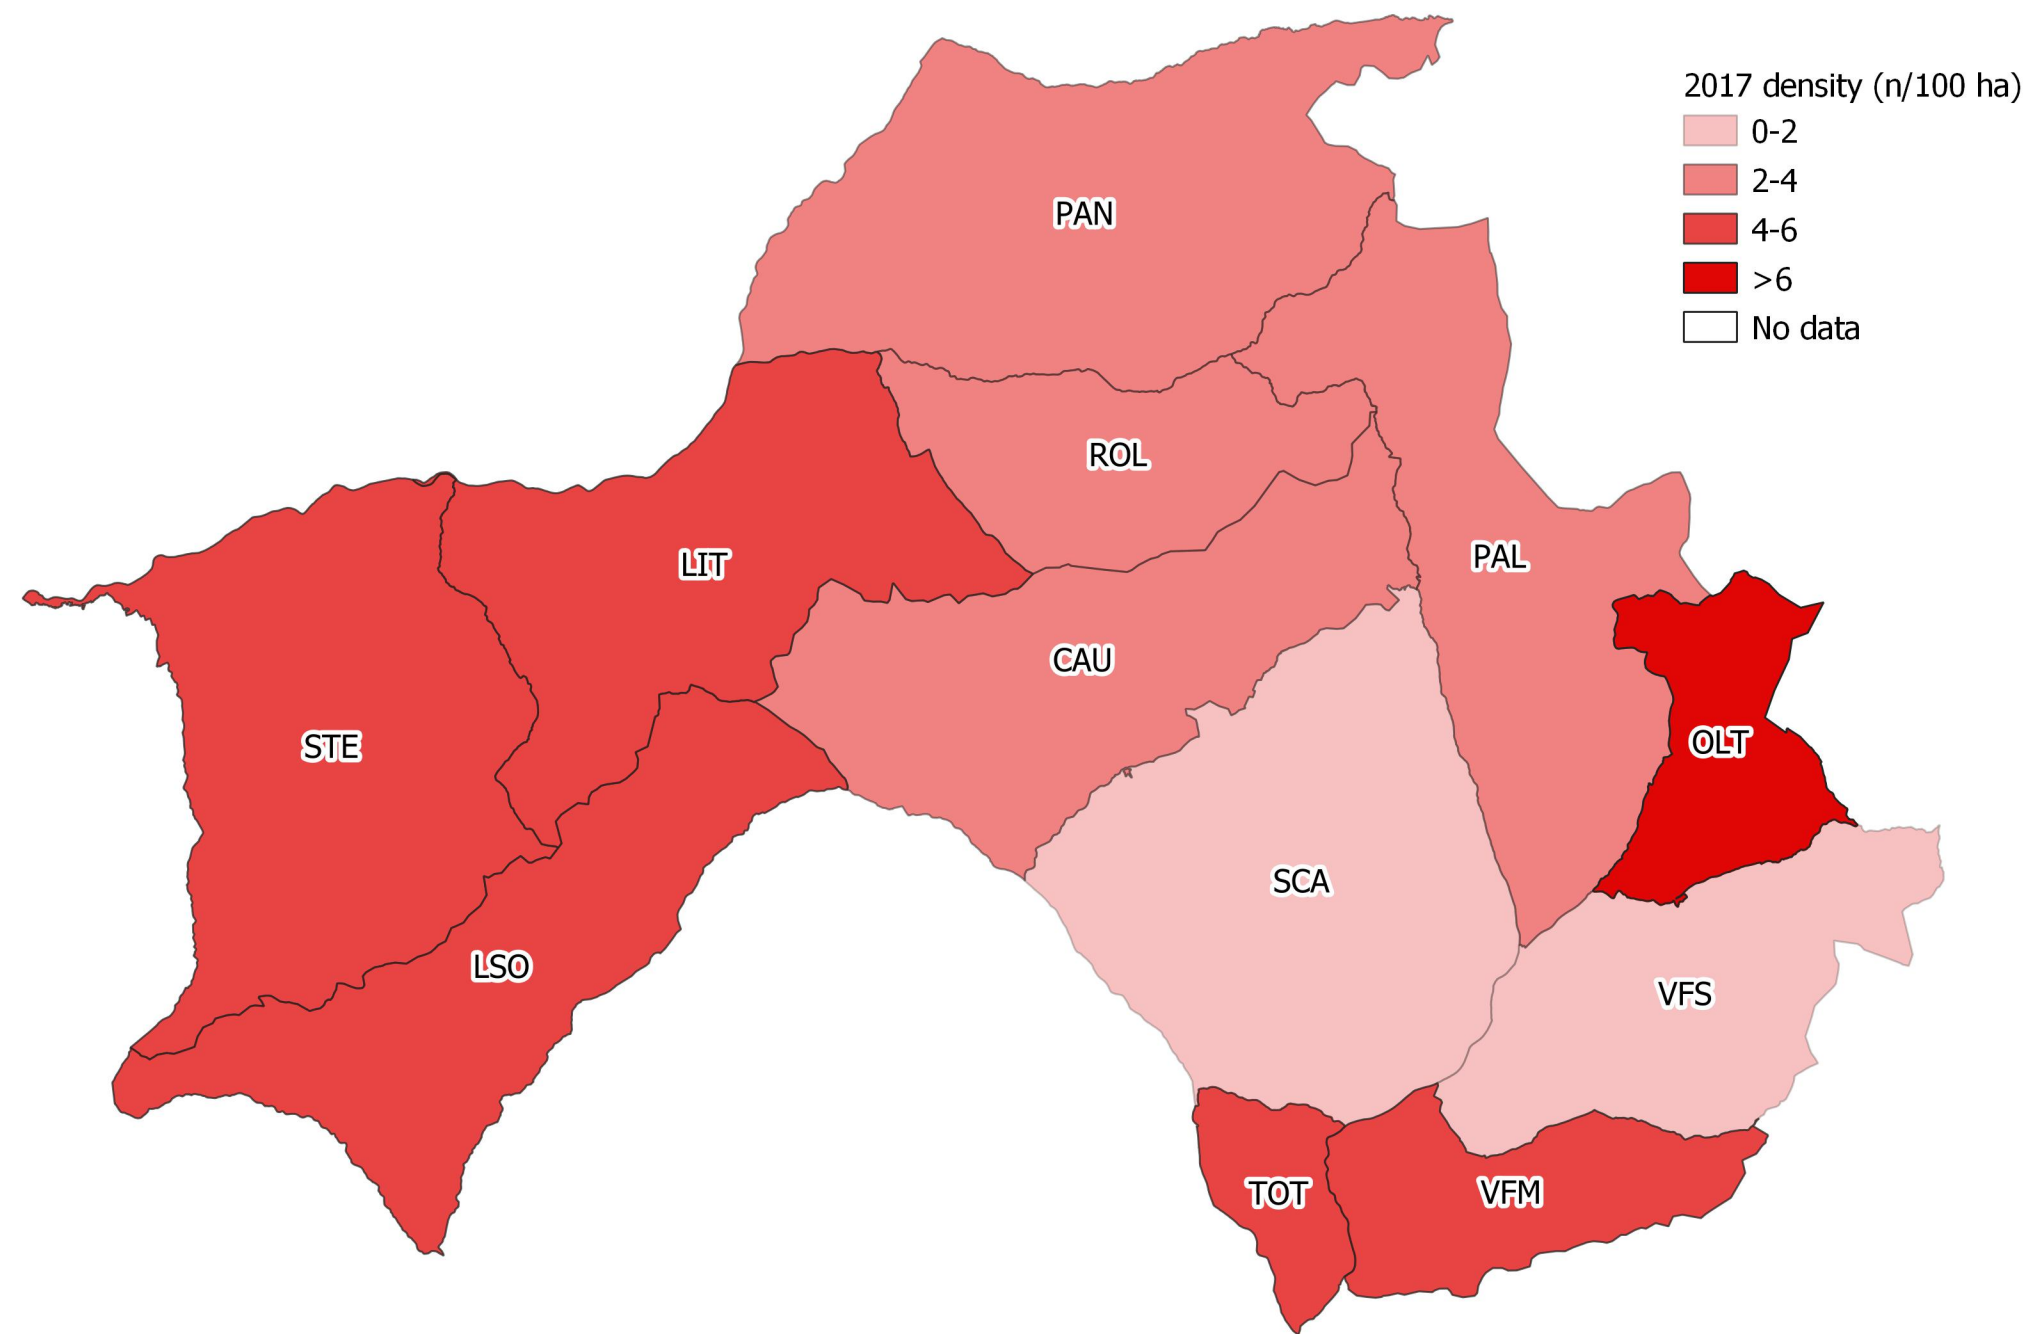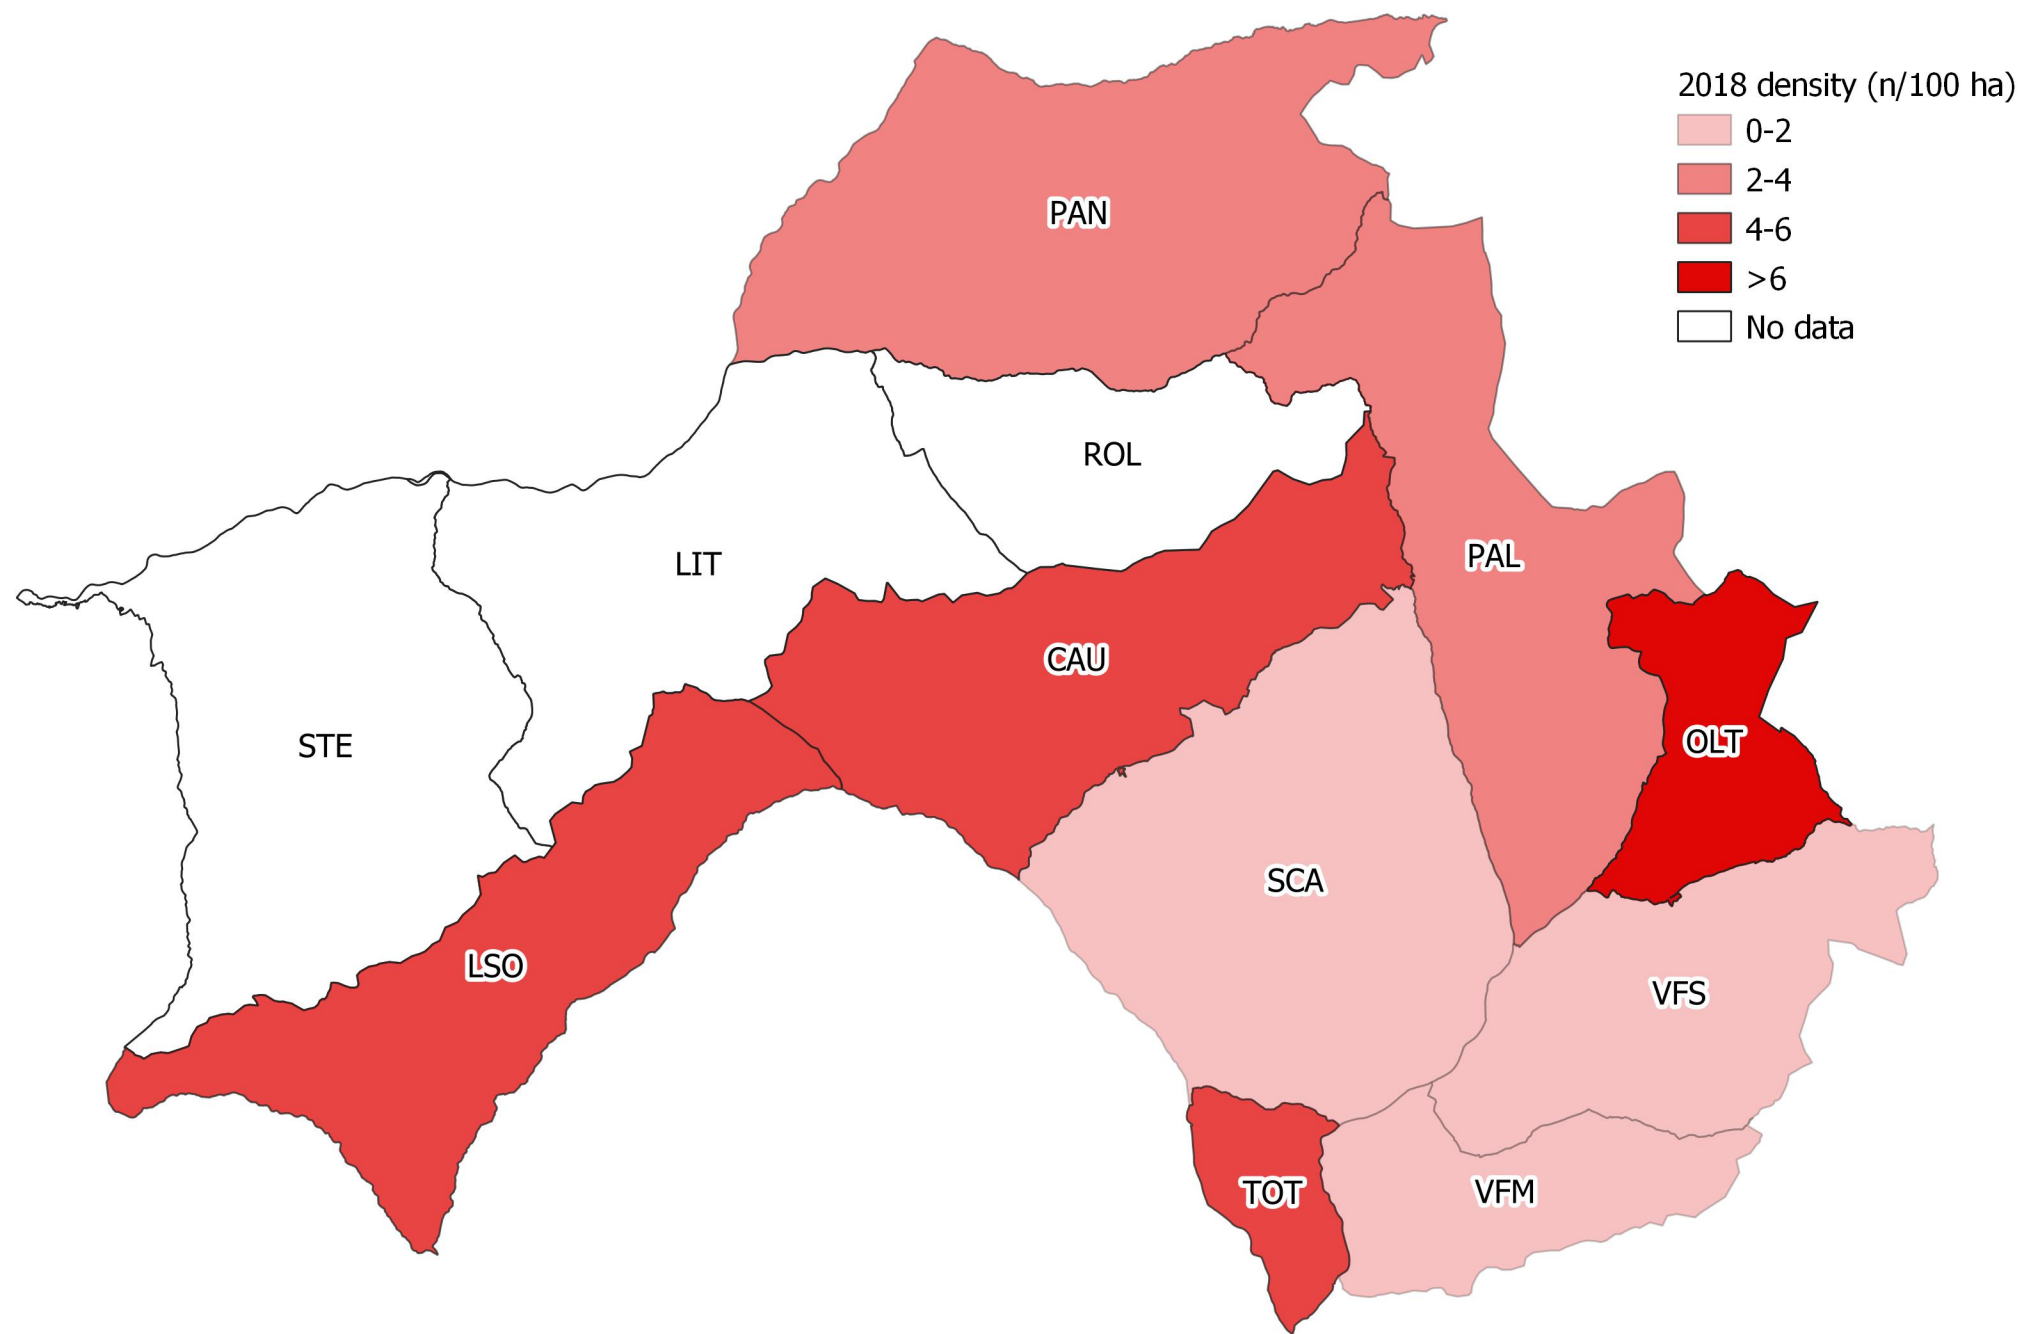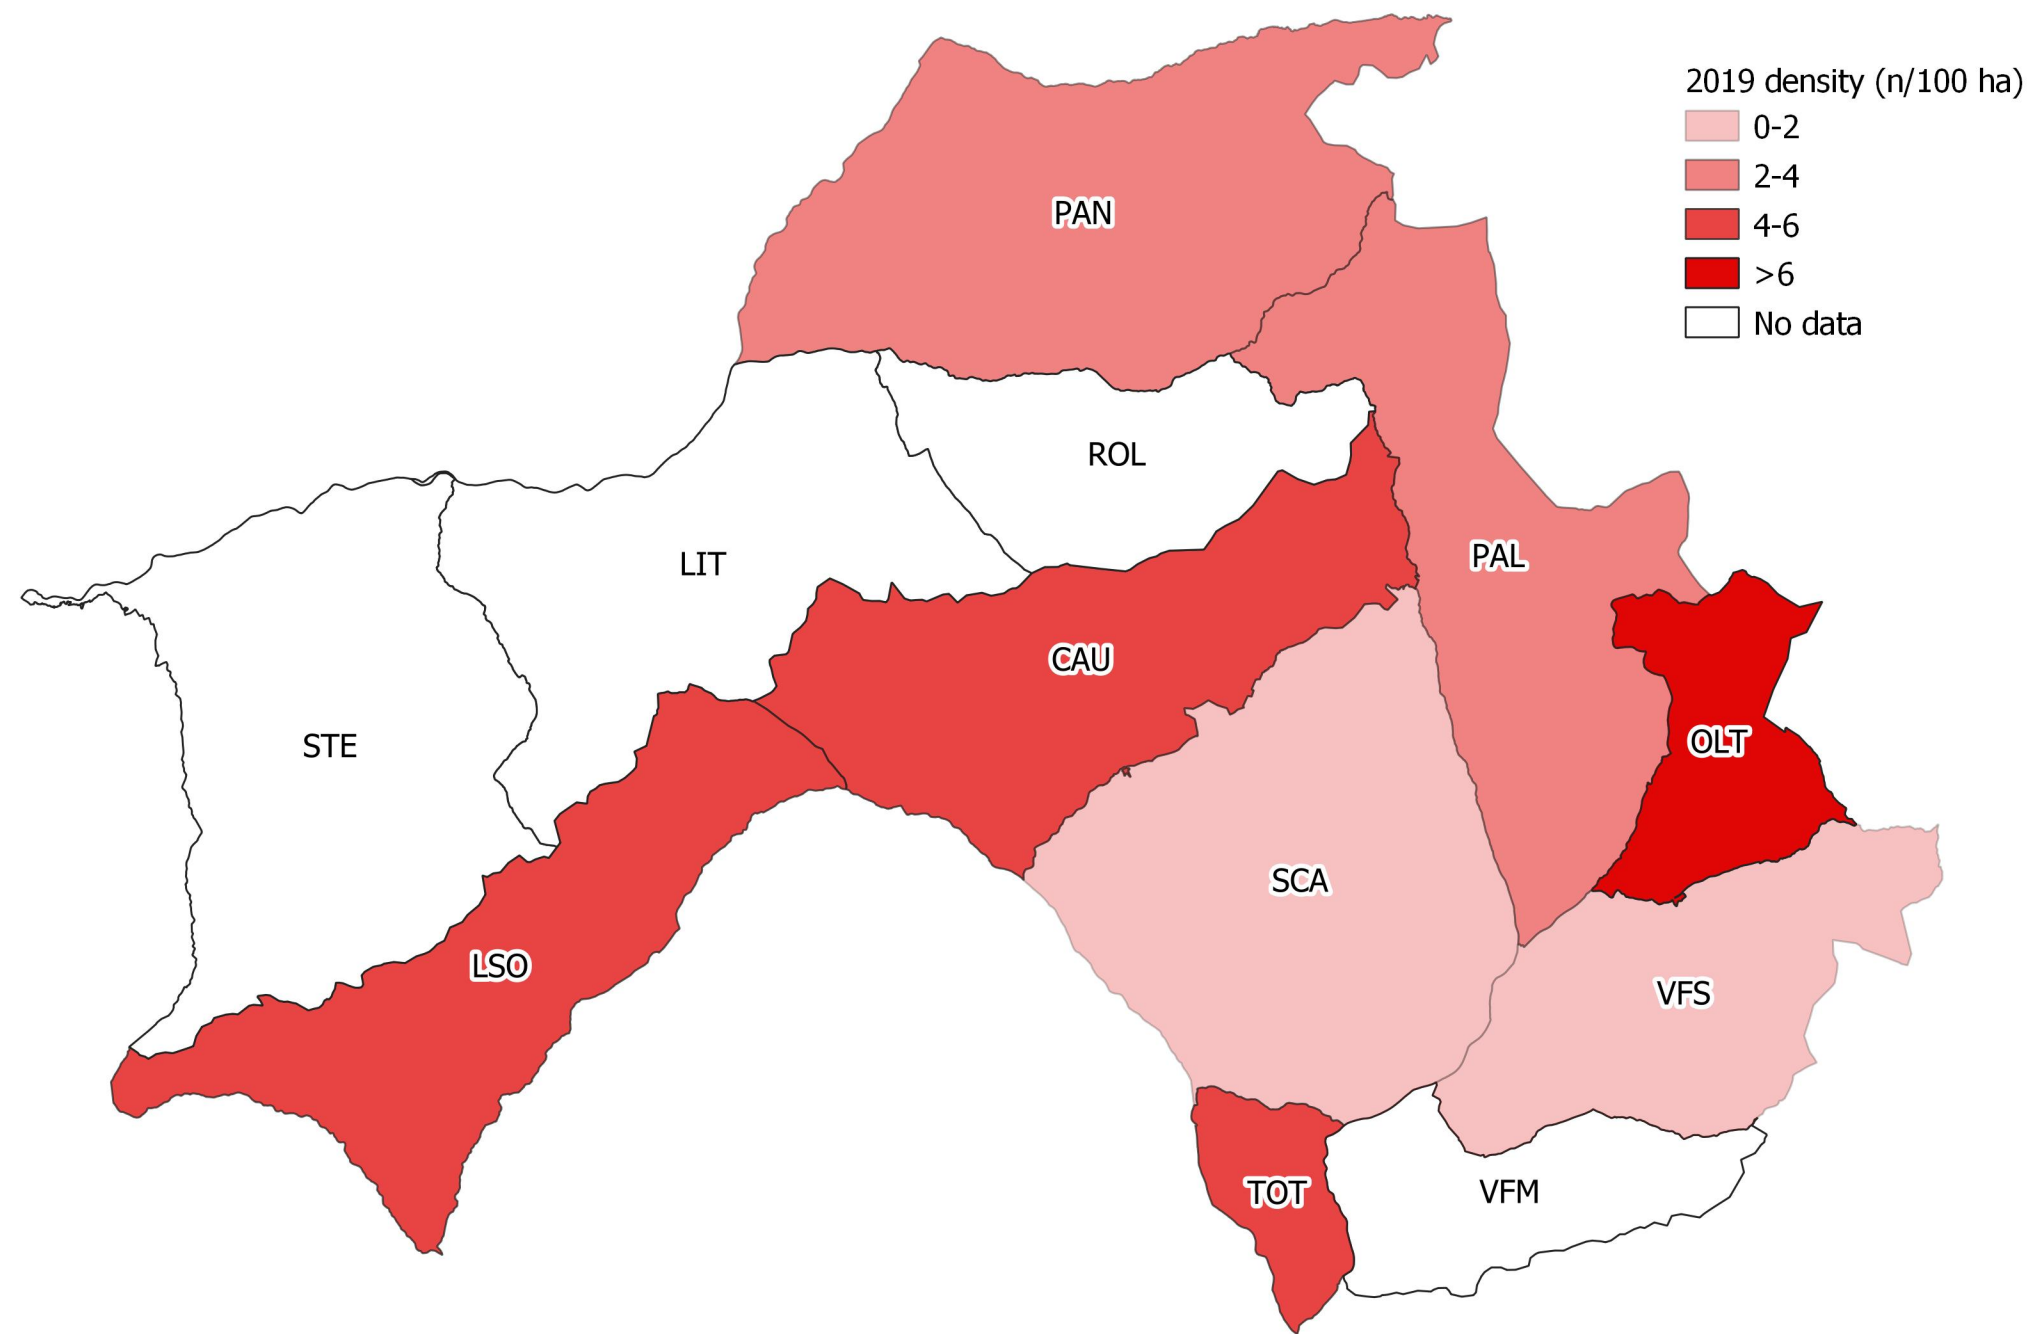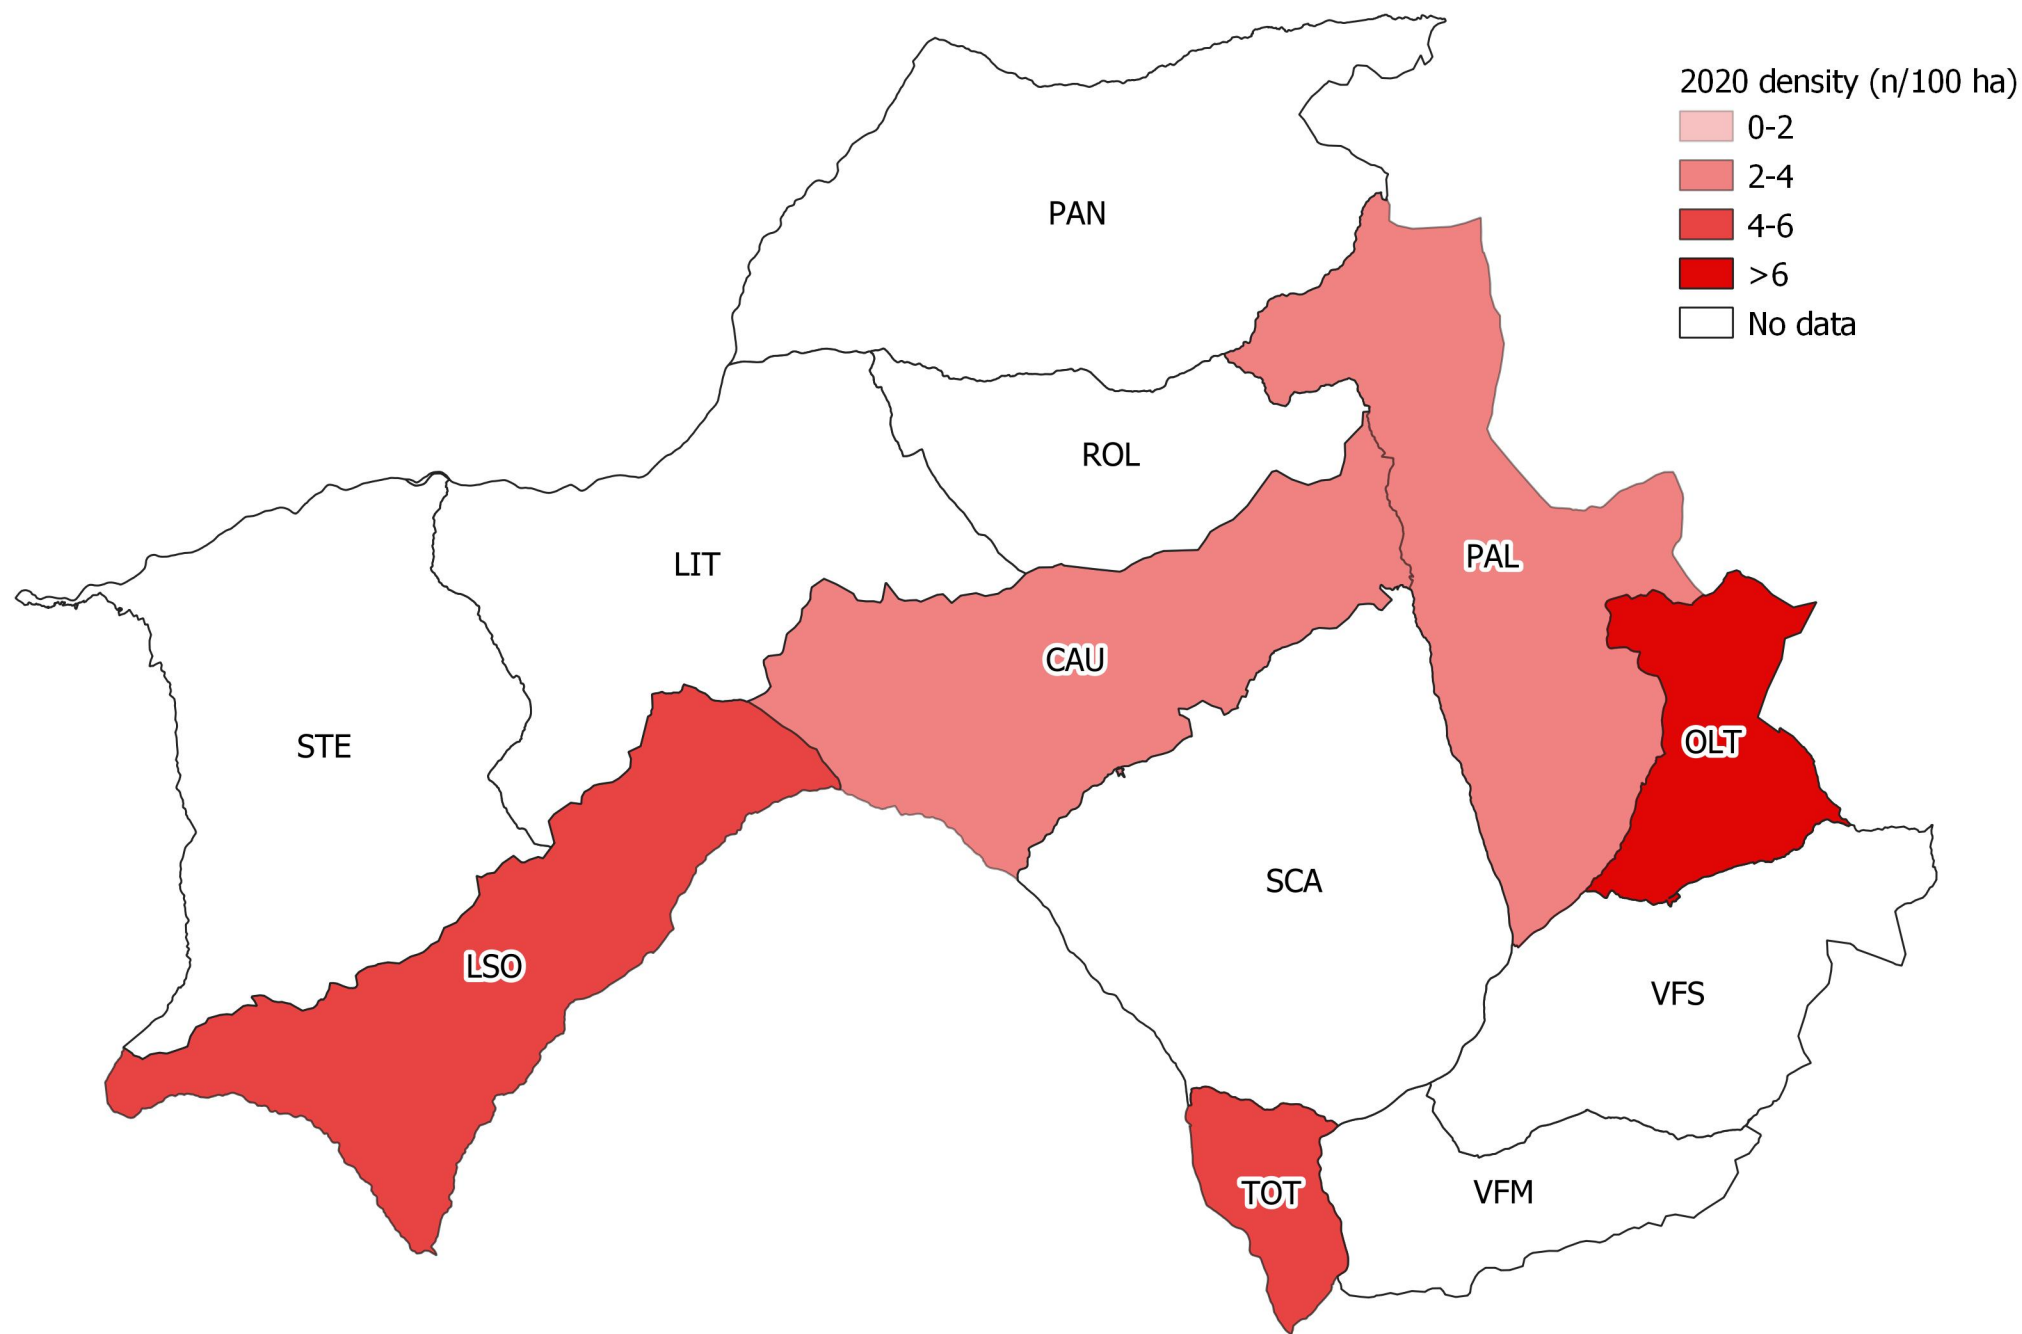

Supplement: s1 [file s1]
